# Supplementary material for: The thiolation of pentafluorobenzene with disulfides by C–H, C–F bond activation and C–S bond formation
Source: Royal Society of Chemistry journal article supplement (doi:10.1039/c7ob02836a), 2018-01-01
Supplement: c7ob02836a1.pdf [file c7ob02836a1.pdf]

## *Supporting Information for*

### **The Thiolation of Pentafluorobenzene with Disulfides by C–H, C–F Bond Activation and C-S Bond Formation**

#### **1) General Information**

Unless otherwise noted, all starting materials were commercially available and were used without further purification. All reactions were carried out under room temperature and air atmosphere.

$^1\text{H}$ ,  $^{13}\text{C}$  and  $^{19}\text{F}$  NMR spectra were recorded on a Bruker AV400 Spectrometer (FT, 400 MHz for  $^1\text{H}$ ; 100 MHz for  $^{13}\text{C}$ ; 376 MHz for  $^{19}\text{F}$ ) at room temperature and  $\text{CDCl}_3$  as the solvent with tetramethylsilane (TMS) as an internal standard. High-resolution mass spectra (HRMS) were recorded on a Bruker Apex IV FTMS mass spectrometer using ESI (electrospray ionization). GC analyses were recorded on TECHCOMP GC7900 spectrometer using FID. Melting points were detected by YUHUA X-4 Micromelting Point Apparatus.

#### **2) Synthesis of Starting Materials**

##### **Preparation of 3a~q**

0.4 mmol pentafluorobenzene, 0.8 mmol disulfides, 0.8 mmol KOH and 2 mL DMF were added to a grinding tube. After that the mixture was stirred at room temperature ( $25^\circ\text{C}$ ) for 10 h. The reaction mixture was quenched with water and extracted with ethyl acetate. The extraction was washed with brine and dried over  $\text{Na}_2\text{SO}_4$ . The solvent was then evaporated in vacuo and the residue was purified by using silicon gel column with petroleum ether to afford the final products.

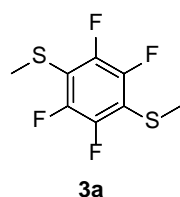

1,4-bis(methylmercapto)-2,3,5,6-tetrafluorobenzene<sup>1</sup> (**3a**): White solid, m.p.  $90 \sim 91^\circ\text{C}$ .  $^1\text{H}$  NMR (400 MHz,  $\text{CDCl}_3$ )  $\delta$ : 2.52 (s, 6H);  $^{13}\text{C}$  NMR (100 MHz,  $\text{CDCl}_3$ )  $\delta$ : 147.90 ~ 147.63 (m), 145.41 ~ 145.15 (m), 115.68 ~ 115.42 (m), 17.72;  $^{19}\text{F}$  NMR (376 MHz,  $\text{CDCl}_3$ )  $\delta$ : -134.84 (s,

4F).

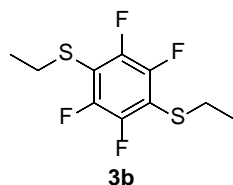

1,4-bis(ethylthio)-2,3,5,6-tetrafluorobenzene<sup>2</sup> (**3b**): White solid, m.p. 43 ~ 44 °C. <sup>1</sup>H NMR (400 MHz, CDCl<sub>3</sub>) δ: 2.97 (q, *J* = 7.2 Hz, 4H), 1.26 (t, *J* = 7.2 Hz, 6H); <sup>13</sup>C NMR (100 MHz, CDCl<sub>3</sub>) δ: 148.26 ~ 148.00 (m), 145.78 ~ 145.52 (m), 114.36 ~ 113.94 (m), 28.82, 15.00. <sup>19</sup>F NMR (376 MHz, CDCl<sub>3</sub>) δ: -134.00 (s, 4F).

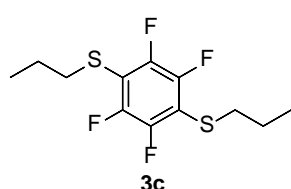

1,4-bis(propylthio)-2,3,5,6-tetrafluorobenzene<sup>3</sup> (**3c**): White solid, m.p. 38 ~ 39 °C. <sup>1</sup>H NMR (400 MHz, CDCl<sub>3</sub>) δ: 2.90 (t, *J* = 7.2 Hz, 4H), 1.63 ~ 1.54 (m, 4H), 1.00 (t, *J* = 7.2 Hz, 6H); <sup>13</sup>C NMR (100 MHz, CDCl<sub>3</sub>) δ: 148.31 ~ 148.04 (m), 145.83 ~ 145.56 (m), 114.67 ~ 114.11 (m), 36.61, 23.20, 12.95. <sup>19</sup>F NMR (376 MHz, CDCl<sub>3</sub>) δ: -134.02 (s, 4F).

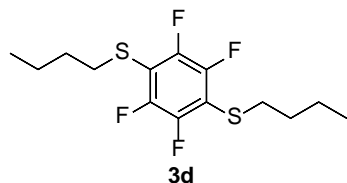

1,4-bis(butylthio)-2,3,5,6-tetrafluorobenzene<sup>3</sup> (**3d**): Colorless oil. <sup>1</sup>H NMR (400 MHz, CDCl<sub>3</sub>) δ: 2.94 (t, *J* = 7.2 Hz, 4H), 1.59 ~ 1.51 (m, 4H), 1.47 ~ 1.38 (m, 4H), 0.90 (t, *J* = 7.2 Hz, 6H); <sup>13</sup>C NMR (100 MHz, CDCl<sub>3</sub>) δ: 148.27 ~ 148.01 (m), 145.79 ~ 145.53 (m), 114.65 ~ 114.23 (m), 34.35, 31.85, 21.54, 13.53. <sup>19</sup>F NMR (376 MHz, CDCl<sub>3</sub>) δ: -134.03 (s, 4F).

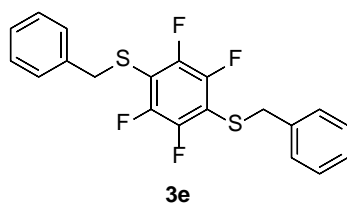

1,4-bis(benzylthio)-2,3,5,6-tetrafluorobenzene (**3e**): White solid, m.p. 140 ~ 143 °C. <sup>1</sup>H NMR (400 MHz, CDCl<sub>3</sub>) δ: 7.25 ~ 7.22 (m, 6H), 7.21 ~ 7.19 (m, 4H), 4.09 (s, 4H); <sup>13</sup>C NMR (100 MHz, CDCl<sub>3</sub>) δ: 148.23 ~ 147.97 (m), 145.74 ~ 145.48 (m), 136.42, 128.77, 128.64, 127.77, 114.22 ~ 113.80 (m), 38.88. <sup>19</sup>F NMR (376 MHz, CDCl<sub>3</sub>) δ: -133.38 (s, 4F). HRMS (ESI) calcd for C<sub>20</sub>H<sub>15</sub>F<sub>4</sub>S<sub>2</sub> [M+H]<sup>+</sup> 395.0551; found 395.0556.

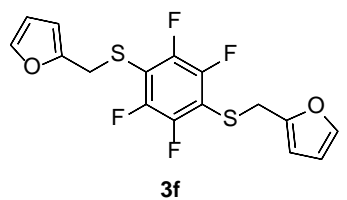

1,4-bis(furfurylthio)-2,3,5,6-tetrafluorobenzene (**3f**): Yellow solid, m.p. 93 ~ 95 °C. <sup>1</sup>H NMR (400 MHz, CDCl<sub>3</sub>) δ: 7.31 (dd, *J* = 1.2 Hz, 0.8 Hz, 2H), 6.22 (dd, *J* = 2 Hz, 1.2 Hz, 2H), 6.03 (d, *J* = 2.8 Hz, 4H); <sup>13</sup>C NMR (100 MHz, CDCl<sub>3</sub>) δ: 149.50, 148.29 ~ 148.03 (m), 145.79 ~ 145.53 (m), 142.92, 113.95 ~ 113.64 (m), 110.50, 108.57, 31.15. <sup>19</sup>F NMR (376 MHz, CDCl<sub>3</sub>) δ: -133.31 (s, 4F). HRMS

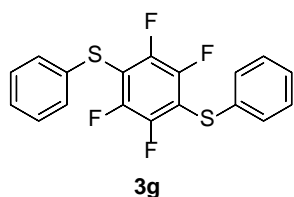

(ESI) calcd for  $C_{16}H_{11}F_4O_2S_2$   $[M+H]^+$  375.0131; found 375.0130.

1,4-bis(phenylthio)-2,3,5,6-tetrafluorobenzene<sup>4</sup> (**3g**): White solid, m.p. 109 ~ 111 °C. <sup>1</sup>H NMR (400 MHz, CDCl<sub>3</sub>) δ: 7.41 ~ 7.38 (m, 4H), 7.33 ~ 7.28 (m, 6H). <sup>13</sup>C NMR (100 MHz, CDCl<sub>3</sub>) δ: 148.36 ~ 148.10 (m), 145.86 ~ 145.55 (m), 132.59, 131.00, 129.41, 128.10, 115.44 ~ 115.03 (m). <sup>19</sup>F NMR (376 MHz, CDCl<sub>3</sub>) δ: -131.96 (s, 4F).

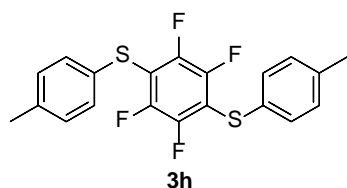

1,4-bis(*p*-tolylthio)-2,3,5,6-tetrafluorobenzene<sup>4</sup> (**3h**):

White solid, m.p. 121 ~ 124 °C. <sup>1</sup>H NMR (400 MHz, CDCl<sub>3</sub>) δ: 7.35 (d, *J* = 8.0 Hz, 4H), 7.13 (d, *J* = 8.0 Hz, 4H), 2.34 (s, 6H). <sup>13</sup>C NMR (100 MHz, CDCl<sub>3</sub>) δ: 148.24 ~ 147.99 (m), 145.74 ~ 145.48 (m), 138.58, 131.81, 130.17, 128.92, 116.00 ~ 115.52 (m), 21.15. <sup>19</sup>F NMR (376 MHz, CDCl<sub>3</sub>) δ: -130.67 (s, 4F).

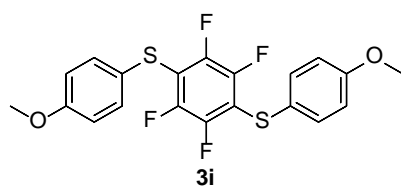

1,4-bis(4-methoxyphenylthio)-2,3,5,6-tetrafluorobenzene<sup>4</sup> (**3i**): White solid, m.p. 110 ~ 112 °C.

<sup>1</sup>H NMR (400 MHz, CDCl<sub>3</sub>) δ: 7.44 (d, *J* = 8.0 Hz, 4H), 6.82 (d, *J* = 8.0 Hz, 4H), 3.78 (s, 6H). <sup>13</sup>C NMR (100 MHz, CDCl<sub>3</sub>) δ: 160.25, 148.00 ~ 147.75 (m), 145.50 ~ 145.25 (m), 134.80, 122.55, 116.46 ~ 116.13 (m), 114.93, 55.37. <sup>19</sup>F NMR (376 MHz, CDCl<sub>3</sub>) δ: -133.36 (s, 4F).

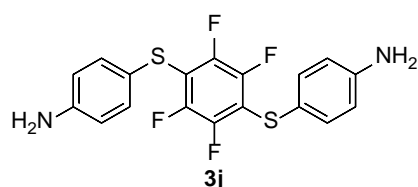

1,4-bis(4-aminophenylthio)-2,3,5,6-tetrafluorobenzene (**3j**): Yellow solid, m.p. 205 ~ 208 °C. <sup>1</sup>H NMR (400 MHz, CDCl<sub>3</sub>) δ: 7.24 (d, *J* = 8.4 Hz, 4H), 6.57 (d, *J* = 8.4 Hz, 4H), 5.77 (s, 4H). <sup>13</sup>C NMR

(100 MHz, CDCl<sub>3</sub>) δ: 147.90 ~ 147.64 (m), 147.13, 145.45 ~ 145.15 (m), 135.38, 119.11, 115.40, 115.16 ~ 114.95 (m). <sup>19</sup>F NMR (376 MHz, CDCl<sub>3</sub>) δ: -133.87 (s, 4F). HRMS (ESI) calcd for  $C_{18}H_{13}F_4N_2S_2$   $[M+H]^+$  397.0451; found 397.0444.

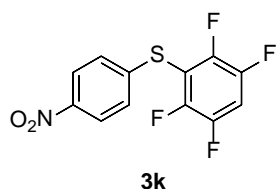

(4-nitrophenyl)(2,3,5,6-tetrafluorophenyl)sulfane<sup>4</sup> (**3k**): Yellow solid, m.p. 94 ~ 96 °C. <sup>1</sup>H NMR (400 MHz, CDCl<sub>3</sub>) δ: 8.13 ~ 8.10 (m, 2H), 7.30 ~ 7.28 (m, 2H), 7.25 ~ 7.21 (m, 1H). <sup>13</sup>C NMR (100 MHz, CDCl<sub>3</sub>) δ: 148.40 ~ 148.20 (m), 147.69 ~ 147.39 (m), 146.58, 145.95 ~ 145.72 (m), 145.18 ~ 144.89 (m), 142.64, 127.97, 124.42, 111.69 ~ 111.29 (m), 108.87 ~ 108.42 (m). <sup>19</sup>F NMR (376 MHz, CDCl<sub>3</sub>) δ: -131.27 ~ -131.37 (m, 2F), -135.95 ~ -136.05 (m, 2F).

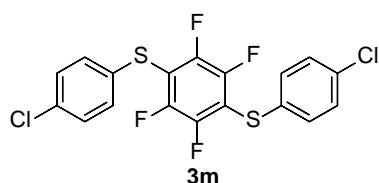

1,4-bis(4-chlorophenylthio)-2,3,5,6-tetrafluorobenzene<sup>4</sup> (**3m**): White solid, m.p. 164 ~ 167 °C. <sup>1</sup>H NMR (400 MHz, CDCl<sub>3</sub>) δ: 7.35 (d, *J* = 8.4 Hz, 4H), 7.28 (d, *J* = 8.4 Hz, 4H). <sup>13</sup>C NMR (100 MHz, CDCl<sub>3</sub>) δ: 148.24 ~ 147.99 (m), 145.72 ~ 145.47 (m), 134.63, 132.67, 130.79, 129.64, 115.44 ~ 115.17 (m). <sup>19</sup>F NMR (376 MHz, CDCl<sub>3</sub>) δ: -131.77 (s, 4F).

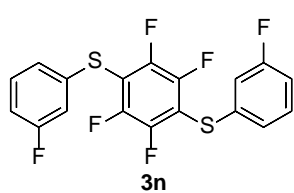

1,4-bis(3-fluorophenylthio)-2,3,5,6-tetrafluorobenzene<sup>4</sup> (**3n**): White solid, m.p. 75 ~ 76 °C. <sup>1</sup>H NMR (400 MHz, CDCl<sub>3</sub>) δ: 7.29 ~ 7.23 (m, 2H), 7.14 (d, *J* = 8.0 Hz, 2H), 7.06 ~ 7.03 (m, 2H), 6.99 ~ 76.94 (m, 2H). <sup>13</sup>C NMR (100 MHz, CDCl<sub>3</sub>) δ: 162.8 (d, *J* = 248.4 Hz), 148.42 ~ 148.17 (m), 145.90 ~ 145.65 (m), 134.56 (d, *J* = 7.8 Hz), 130.73 (d, *J* = 8.4 Hz), 126.12 (d, *J* = 3.1 Hz), 117.25 (d, *J* = 23.3 Hz), 115.21 (d, *J* = 21.0 Hz), 115.01 ~ 114.76 (m). <sup>19</sup>F NMR (376 MHz, CDCl<sub>3</sub>) δ: -110.91 (s, 2F), -131.21 (s, 4F).

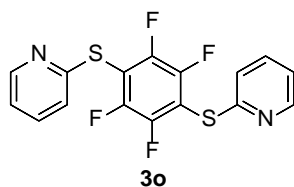

2,3,5,6-tetrafluoro-1,4-bis(2-pyridylsulfenyl)benzene (**3o**): White solid, m.p. 155 ~ 158 °C. <sup>1</sup>H NMR (400 MHz, CDCl<sub>3</sub>) δ: 8.43 (d, *J* = 4.4 Hz, 2H), 7.60 ~ 7.55 (m, 4H), 7.09 ~ 7.06 (m, 2H). <sup>13</sup>C NMR (100 MHz, CDCl<sub>3</sub>) δ: 155.47, 150.11, 148.70 ~ 148.45 (m), 146.19 ~ 145.93 (m), 137.07, 121.92, 121.19, 112.69 ~ 112.26 (m). <sup>19</sup>F NMR (376 MHz, CDCl<sub>3</sub>) δ: -130.68 (s, 4F)

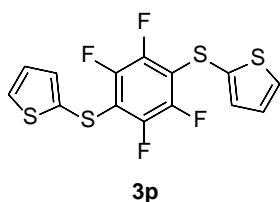

2,3,5,6-tetrafluoro-1,4-bis(2-thienylsulfenyl)benzene (**3p**):

Yellow solid, m.p. 115 ~ 117 °C. <sup>1</sup>H NMR (400 MHz, CDCl<sub>3</sub>)

δ: 7.40 (dd, *J* = 5.2, 1.2 Hz, 2H), 7.36 (dd, *J* = 3.8, 0.8 Hz, 2H),

6.97 (dd, *J* = 5.2, 3.6 Hz, 2H). <sup>13</sup>C NMR (100 MHz, CDCl<sub>3</sub>) δ:

147.93 ~ 147.65 (m), 145.39 ~ 145.14 (m), 136.69, 131.56,

128.69, 127.68, 116.80 ~ 116.39 (m). <sup>19</sup>F NMR (376 MHz, CDCl<sub>3</sub>) δ: -133.02 (s, 4F).

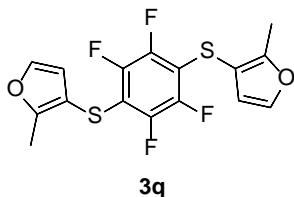

2,3,5,6-tetrafluoro-1,4-bis(2-methyl-3-furyl)sulfenyl)benzene (**3q**):

Yellow solid, m.p. 100 ~ 102 °C. <sup>1</sup>H NMR (400 MHz, CDCl<sub>3</sub>)

δ: 7.24 (d, *J* = 2 Hz, 2H), 6.38 (d, *J* = 1.6 Hz, 2H), 2.41 (s,

6H). <sup>13</sup>C NMR (100 MHz, CDCl<sub>3</sub>) δ: 157.30, 147.95 ~ 147.66

(m), 145.45 ~ 145.23 (m), 140.84, 115.24, 111.86 ~ 111.68 (m), 107.09, 11.86. <sup>19</sup>F NMR

(376 MHz, CDCl<sub>3</sub>) δ: -133.97 (s, 4F). HRMS (ESI) calcd for C<sub>16</sub>H<sub>11</sub>F<sub>4</sub>O<sub>2</sub>S<sub>2</sub> [M+H]<sup>+</sup>

375.0131; found 375.0129.

### Preparation of 7a and 7b

5 mmol pentafluorobenzene, 5 mmol arylthiols sodium and 25 mL DMF were added to a round bottomed flask. After that the mixture was stirred at room temperature (25 °C) for 10 h. The reaction mixture was quenched with water and extracted with ethyl acetate. The extraction was washed with brine and dried over Na<sub>2</sub>SO<sub>4</sub>. The solvent was then evaporated in vacuo and the residue was purified by using silicon gel column with petroleum ether to afford the final products.

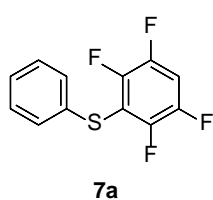

1-phenylthio-2,3,5,6-tetrafluorobenzene<sup>5</sup> (**7a**): Colorless liquid. <sup>1</sup>H

NMR (400 MHz, CDCl<sub>3</sub>) δ: 7.42 ~ 7.39 (m, 2H), 7.35 ~ 7.29 (m,

3H), 7.18 ~ 7.09 (m, 1H). <sup>13</sup>C NMR (100 MHz, CDCl<sub>3</sub>) δ: 148.26 ~

148.07 (m), 147.47 ~ 147.17 (m), 145.81 ~ 145.61 (m), 144.98 ~

144.68 (m), 133.04, 130.55, 129.36, 127.85, 115.08 ~ 114.68 (m), 107.24 ~ 106.79 (m).

<sup>19</sup>F NMR (376 MHz, CDCl<sub>3</sub>) δ: -132.63 ~ -132.72 (m, 2F), -137.50 ~ -137.60 (m, 2F).

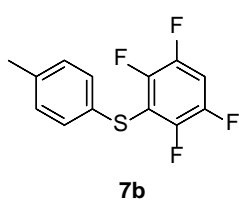

1-phenylthio-2,3,5,6-tetrafluorobenzene (**7b**): Colorless liquid.  $^1\text{H}$  NMR (400 MHz,  $\text{CDCl}_3$ )  $\delta$ : 7.32 (d,  $J = 8$  Hz, 2H), 7.11 (d,  $J = 8$  Hz, 2H), 2.33 (s, 3H).  $^{13}\text{C}$  NMR (100 MHz,  $\text{CDCl}_3$ )  $\delta$ : 148.13 ~ 147.94 (m), 147.41 ~ 147.15 (m), 145.68 ~ 145.48 (m), 144.92 ~ 144.62 (m), 138.35, 131.44, 130.12, 129.25, 115.68 (t,  $J = 20$  Hz), 106.67 (t,  $J = 22.6$  Hz), 21.13.  $^{19}\text{F}$  NMR (376 MHz,  $\text{CDCl}_3$ )  $\delta$ : -133.03 ~ -133.13 (m, 2F), -137.71 ~ -137.81 (m, 2F).

### Preparation of 5b and 5h

0.4 mmol pentafluorobenzene, 0.4 mmol arylsulfane tetrafluorobenzene and 2 mL DMF were added to a grinding tube. After that the mixture was stirred at room temperature (25 °C) for 10 h. The reaction mixture was quenched with water and extracted with ethyl acetate. The extraction was washed with brine and dried over  $\text{Na}_2\text{SO}_4$ . The solvent was then evaporated in vacuo and the residue was purified by using silicon gel column with petroleum ether to afford the final products.

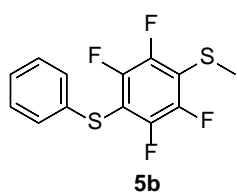

1-methylmercapto-4-phenylmercapto-2,3,5,6-tetrafluorobenzene (**5b**): Colorless liquid.  $^1\text{H}$  NMR (400 MHz,  $\text{CDCl}_3$ )  $\delta$ : 7.41 ~ 7.39 (m, 2H), 7.35 ~ 7.29 (m, 3H), 2.58 (s, 3H).  $^{13}\text{C}$  NMR (100 MHz,  $\text{CDCl}_3$ )  $\delta$ : 148.32 ~ 147.61 (m), 145.82 ~ 145.19 (m), 133.09, 130.58, 129.35, 127.86, 118.17 ~ 117.72 (m), 113.19 ~ 112.64 (m), 17.47 (t,  $J = 4.3$  Hz).  $^{19}\text{F}$  NMR (376 MHz,  $\text{CDCl}_3$ )  $\delta$ : -132.85 ~ -132.95 (m, 2F), -134.12 ~ -134.23 (m, 2F).

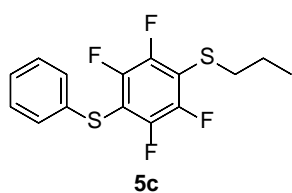

propyl(2,3,5,6-tetrafluoro-4-(p-tolylthio)phenyl)-sulfane (**5c**): Colorless liquid.  $^1\text{H}$  NMR (400 MHz,  $\text{CDCl}_3$ )  $\delta$ : 7.37 ~ 7.35 (m, 2H), 7.30 ~ 7.24 (m, 3H), 2.93 (t,  $J = 7.2$  Hz, 2H), 1.64 ~ 1.55 (m, 2H), 1.00 (t,  $J = 7.2$  Hz, 3H).  $^{13}\text{C}$  NMR (100 MHz,  $\text{CDCl}_3$ )  $\delta$ : 148.31 ~ 148.02 (m), 145.90 ~ 145.66 (m), 133.02, 130.60, 129.37, 127.88, 129.21, 116.38 (t,  $J = 20$  Hz), 113.29 (t,  $J = 20$  Hz), 36.52 (t,  $J = 3.1$  Hz), 23.26, 13.02.  $^{19}\text{F}$  NMR (376 MHz,  $\text{CDCl}_3$ )  $\delta$ : -133.15 ~ -133.26 (m, 2F), -133.34 ~ -133.45 (m, 2F). HRMS (ESI) calcd for  $\text{C}_{15}\text{H}_{13}\text{F}_4\text{S}_2$   $[\text{M}+\text{H}]^+$  333.0395; found 333.0398.

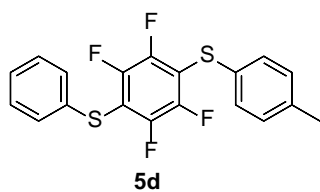

phenyl(2,3,5,6-tetrafluoro-4-(*p*-tolylthio)phenyl)-sulfane

**(5d)**: White solid, m.p. 78 ~ 79 °C. <sup>1</sup>H NMR (400 MHz, CDCl<sub>3</sub>) δ: 7.40 ~ 7.28 (m, 7H), 7.13 (d, *J* = 8 Hz 2H), 2.34 (s, 3H). <sup>13</sup>C NMR (100 MHz, CDCl<sub>3</sub>) δ: 148.30 ~ 148.06

(m), 145.83 ~ 145.44 (m), 138.67, 132.70, 131.90, 130.90, 130.20, 129.83, 129.41, 128.76, 128.53, 128.05, 116.21 (t, *J* = 20 Hz), 114.78 (t, *J* = 20 Hz), 21.19. <sup>19</sup>F NMR (376 MHz, CDCl<sub>3</sub>) δ: -132.09 ~ -132.20 (m, 2F), -132.31 ~ -132.42 (m, 2F).

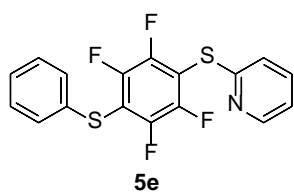

2-((2,3,5,6-tetrafluoro-4-(phenylthio)phenyl)thio)-pyridine

**(5e)**: White solid, m.p. 114 ~ 115 °C. <sup>1</sup>H NMR (400 MHz, CDCl<sub>3</sub>) δ: 8.38 ~ 8.37 (m, 1H), 7.62 ~ 7.58 (m, 1H), 7.46 ~ 7.44 (m, 2H), 7.37 ~ 7.31 (m, 3H), 7.28 ~ 7.24 (m, 1H), 7.12

~ 7.09 (m, 1H). <sup>13</sup>C NMR (100 MHz, CDCl<sub>3</sub>) δ: 155.39, 150.11, 148.61 ~ 148.11 (m), 146.16 ~ 145.63 (m), 137.05, 132.55, 131.03, 129.43, 128.12, 121.91, 121.19, 116.14 (t, *J* = 20 Hz), 111.56 (t, *J* = 20 Hz). <sup>19</sup>F NMR (376 MHz, CDCl<sub>3</sub>) δ: -130.54 ~ -130.66 (m, 2F), -132.04 ~ -132.16 (m, 2F). HRMS (ESI) calcd for C<sub>17</sub>H<sub>10</sub>F<sub>4</sub>NS<sub>2</sub> [M+H]<sup>+</sup> 368.0185; found 368.0180.

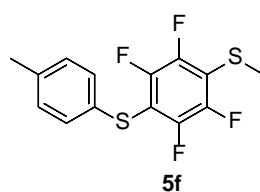

methyl(2,3,5,6-tetrafluoro-4-(*p*-tolylthio)phenyl)sulfane **(5f)**:

Colorless liquid. <sup>1</sup>H NMR (400 MHz, CDCl<sub>3</sub>) δ: 7.33 (d, *J* = 8 Hz, 2H), 7.12 (d, *J* = 8 Hz, 2H), 2.55 (s, 3H), 2.34 (s, 3H). <sup>13</sup>C NMR (100 MHz, CDCl<sub>3</sub>) δ: 148.19 ~ 147.63 (m), 145.73 ~

145.11 (m), 138.39, 131.48, 130.13, 129.27, 117.42 (t, *J* = 20 Hz), 113.80 (t, *J* = 20 Hz), 21.13, 17.53 (t, *J* = 4.3 Hz). <sup>19</sup>F NMR (376 MHz, CDCl<sub>3</sub>) δ: -133.19 ~ -133.29 (m, 2F), -134.23 ~ -134.34 (m, 2F).

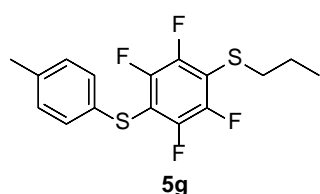

propyl(2,3,5,6-tetrafluoro-4-(*p*-tolylthio)phenyl)-sulfane

**(5g)**: Colorless liquid. <sup>1</sup>H NMR (400 MHz, CDCl<sub>3</sub>) δ: 7.32 (d, *J* = 8 Hz, 2H), 7.11 (d, *J* = 8 Hz, 2H), 2.93 (t, *J* = 7.2 Hz, 2H), 2.33 (s, 3H), 1.63 ~ 1.58 (m, 2H), 1.01 (t, *J* = 7.2 Hz,

3H). <sup>13</sup>C NMR (100 MHz, CDCl<sub>3</sub>) δ: 148.36 ~ 147.93 (m), 145.85 ~ 145.42 (m), 138.41, 131.53, 131.45, 130.13, 129.21, 115.88 (t, *J* = 20 Hz), 114.22 (t, *J* = 20 Hz), 36.54 (t, *J* = 2.9 Hz), 23.25, 21.14, 13.01. <sup>19</sup>F NMR (376 MHz, CDCl<sub>3</sub>) δ: -133.15 ~ -133.26 (m,

2F), -133.34 ~ -133.45 (m, 2F). HRMS (ESI) calcd for C<sub>16</sub>H<sub>15</sub>F<sub>4</sub>S<sub>2</sub> [M+H]<sup>+</sup> 347.0551; found 347.0555.

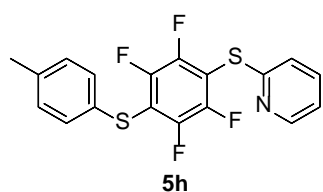

2-((2,3,5,6-tetrafluoro-4-(p-tolylthio)phenyl)thio)-pyridine

(**5h**): White solid, m.p. 89 ~ 90 °C. <sup>1</sup>H NMR (400 MHz, CDCl<sub>3</sub>) δ: 8.36 ~ 8.35 (m, 1H), 7.59 ~ 7.55 (m, 1H), 7.38 (d, *J* = 7.6 Hz 2H), 7.21 (d, *J* = 8 Hz 1H), 7.13 (d, *J* = 8 Hz 2H),

7.10 ~ 7.06 (m, 1H), 2.34 (s, 3H). <sup>13</sup>C NMR (100 MHz, CDCl<sub>3</sub>) δ: 155.49, 150.09, 148.57 ~ 148.17 (m), 146.13 ~ 145.51 (m), 138.60, 137.03, 131.89, 130.19, 128.71, 121.84, 121.15, 117.03 (t, *J* = 20 Hz), 111.07 (t, *J* = 20 Hz), 21.17. <sup>19</sup>F NMR (376 MHz, CDCl<sub>3</sub>) δ: -130.78 ~ -130.90 (m, 2F), -132.45 ~ -132.56 (m, 2F). HRMS (ESI) calcd for C<sub>18</sub>H<sub>12</sub>F<sub>4</sub>NS<sub>2</sub> [M+H]<sup>+</sup> 382.0342; found 382.0345.

## Preparation of 8

0.4 mmol pentafluorobenzene, 2.4 mmol sodium thiophenolate and 2 mL DMF were added to a grinding tube. After that the mixture was stirred at room temperature (25 °C) for 10 h. The reaction mixture was quenched with water and extracted with ethyl acetate. The extraction was washed with brine and dried over Na<sub>2</sub>SO<sub>4</sub>. The solvent was then evaporated in vacuo and the residue was purified by using silicon gel column with petroleum ether to afford the final products.

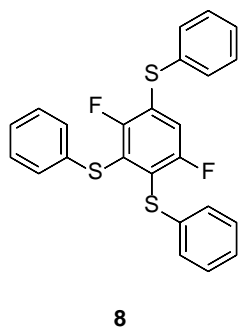

1,2,4-tris(phenylthio)-3,6-difluorobenzene<sup>6</sup> (**8**): White solid. m.p. 93 - 95 °C. <sup>1</sup>H NMR (400 MHz, CDCl<sub>3</sub>) δ: 7.57-7.54 (m, 2H), 7.48-7.46 (m, 3H), 7.28-7.19 (m, 10H), 6.65 (dd, *J* = 8.4, 6.4 Hz, 1H). <sup>13</sup>C NMR (100 MHz, CDCl<sub>3</sub>) δ: 159.27 (dd, *J* = 246.8, 2.9 Hz), 155.51 (dd, *J* = 243.4, 2.8 Hz), 135.31 (dd, *J* = 55.7, 1.6 Hz), 134.45, 130.26 - 130.18 (m), 129.98, 129.54, 129.43, 129.03,

128.98, 128.78, 128.10 (d, *J* = 18.9 Hz), , 126.85, 126.55, 123.82 (d, *J* = 19.5 Hz), 116.11 (dd, *J* = 29.2, 2.8 Hz). <sup>19</sup>F NMR (376 MHz, CDCl<sub>3</sub>) δ: -102.75 (d, *J* = 14.7 Hz, 1F), -104.38 (d, *J* = 14.7 Hz, 1F).



### 3) Scanned $^1\text{H}$ NMR, $^{13}\text{C}$ NMR and $^{19}\text{F}$ NMR spectra

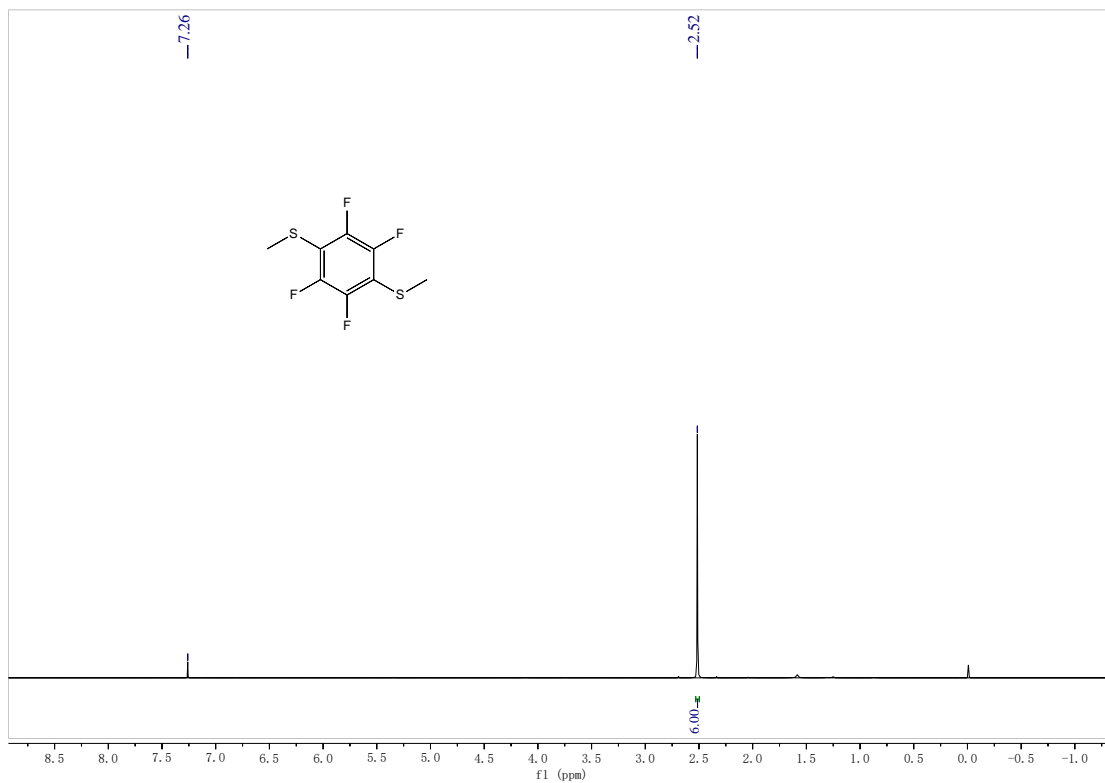

$^1\text{H}$  NMR (400 MHz,  $\text{CDCl}_3$ ): 1,4-bis(methylmercapto)-2,3,5,6-tetrafluorobenzene (**3a**)

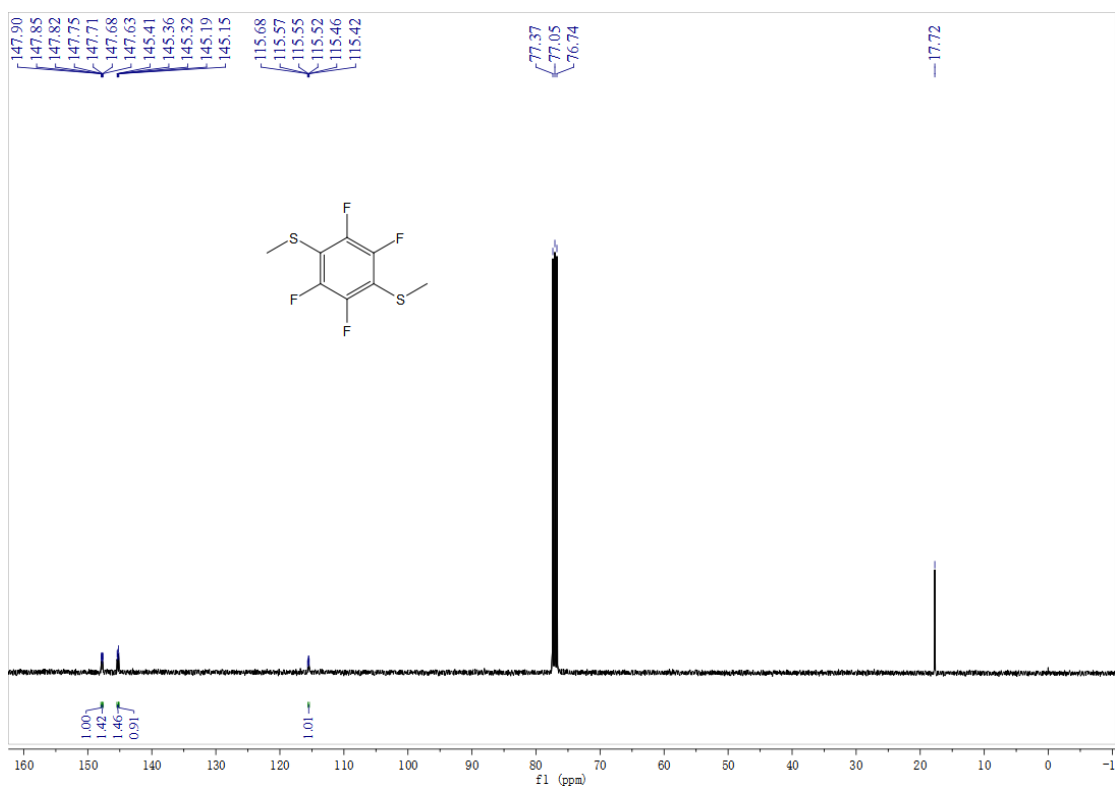

$^{13}\text{C}$  NMR (100 MHz,  $\text{CDCl}_3$ ): 1,4-bis(methylmercapto)-2,3,5,6-tetrafluorobenzene (**3a**)

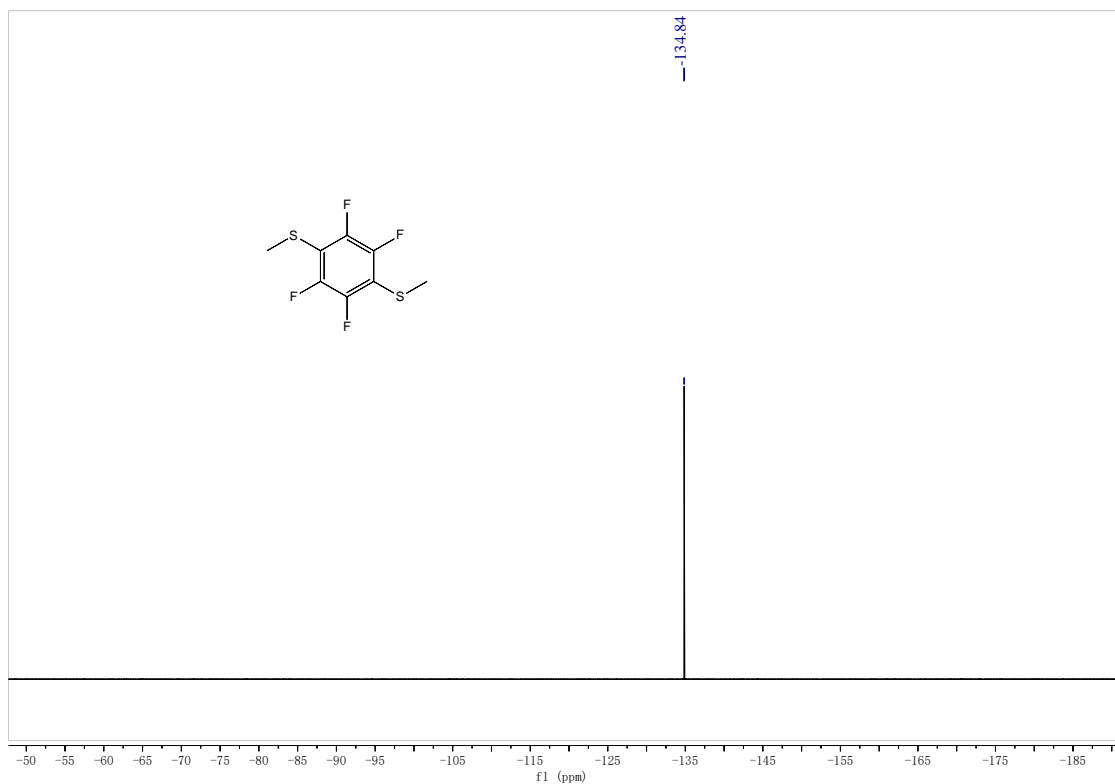

$^{19}\text{F}$  NMR (376 MHz,  $\text{CDCl}_3$ ): 1,4-bis(methylmercapto)-2,3,5,6-tetrafluorobenzene (**3a**)

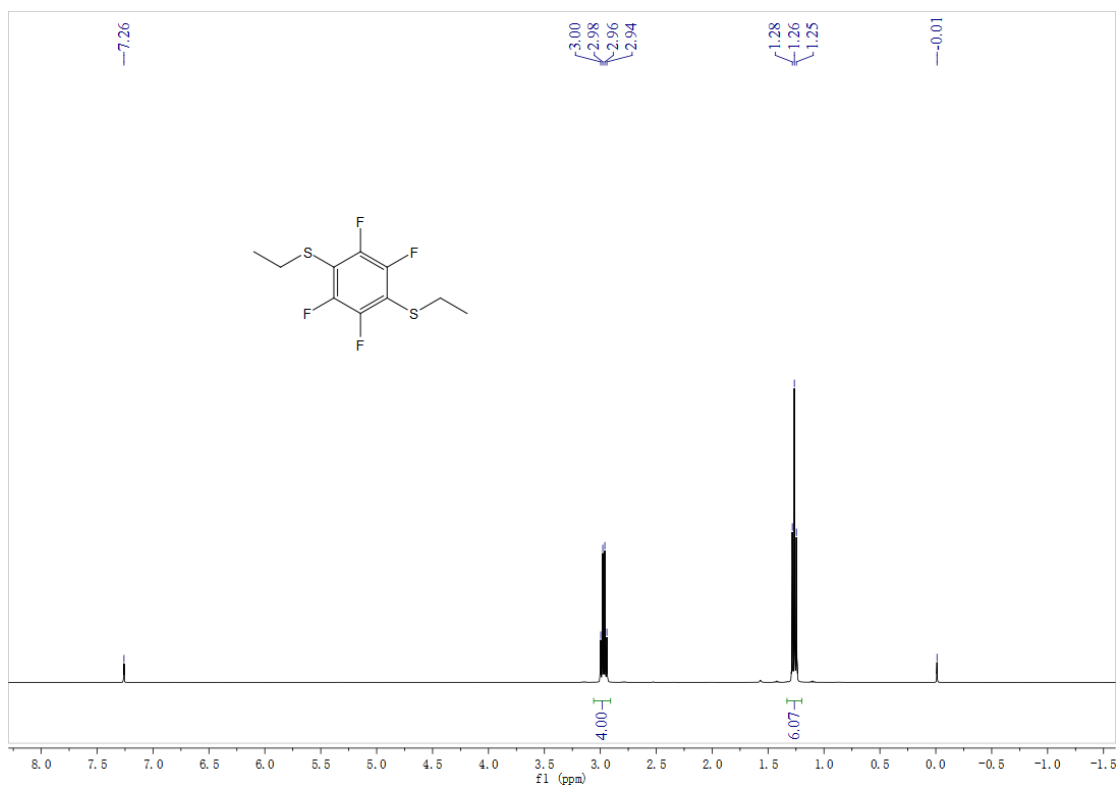

$^1\text{H}$  NMR (400 MHz,  $\text{CDCl}_3$ ): 1,4-bis(ethylthio)-2,3,5,6-tetrafluorobenzene (**3b**)

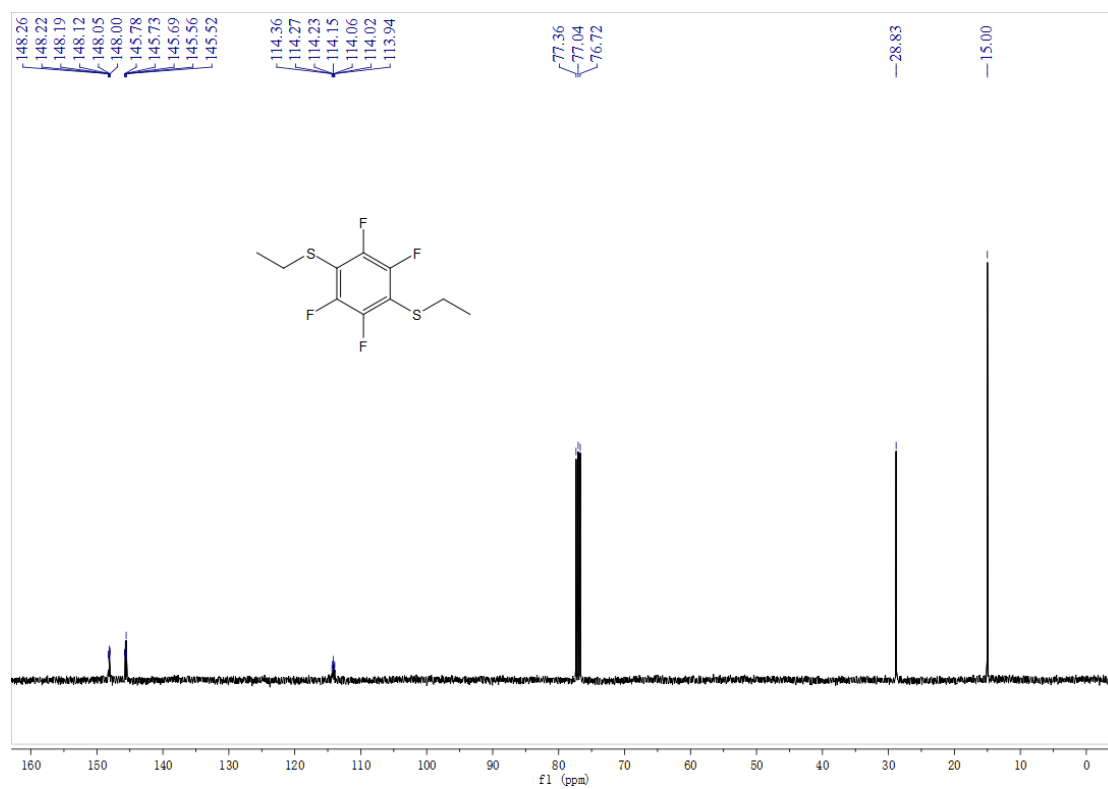

<sup>13</sup>C NMR (100 MHz, CDCl<sub>3</sub>): 1,4-bis(ethylthio)-2,3,5,6-tetrafluorobenzene (**3b**)

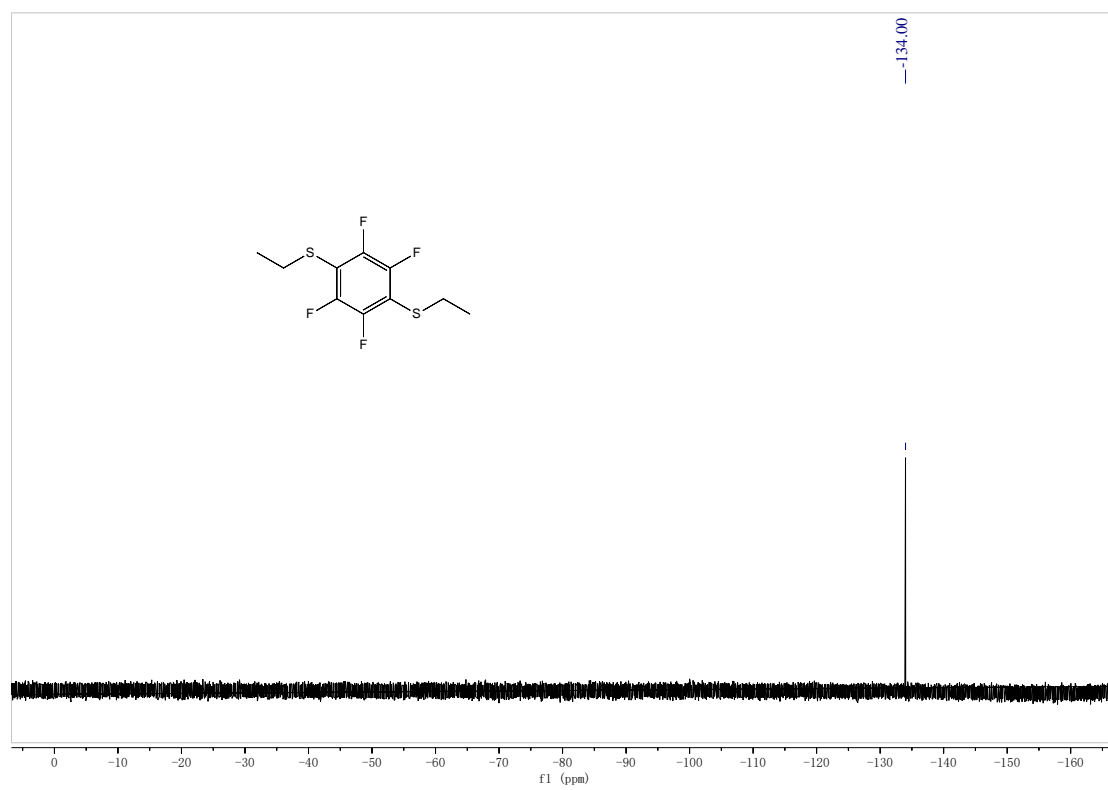

<sup>19</sup>F NMR (376 MHz, CDCl<sub>3</sub>): 1,4-bis(ethylthio)-2,3,5,6-tetrafluorobenzene (**3b**)

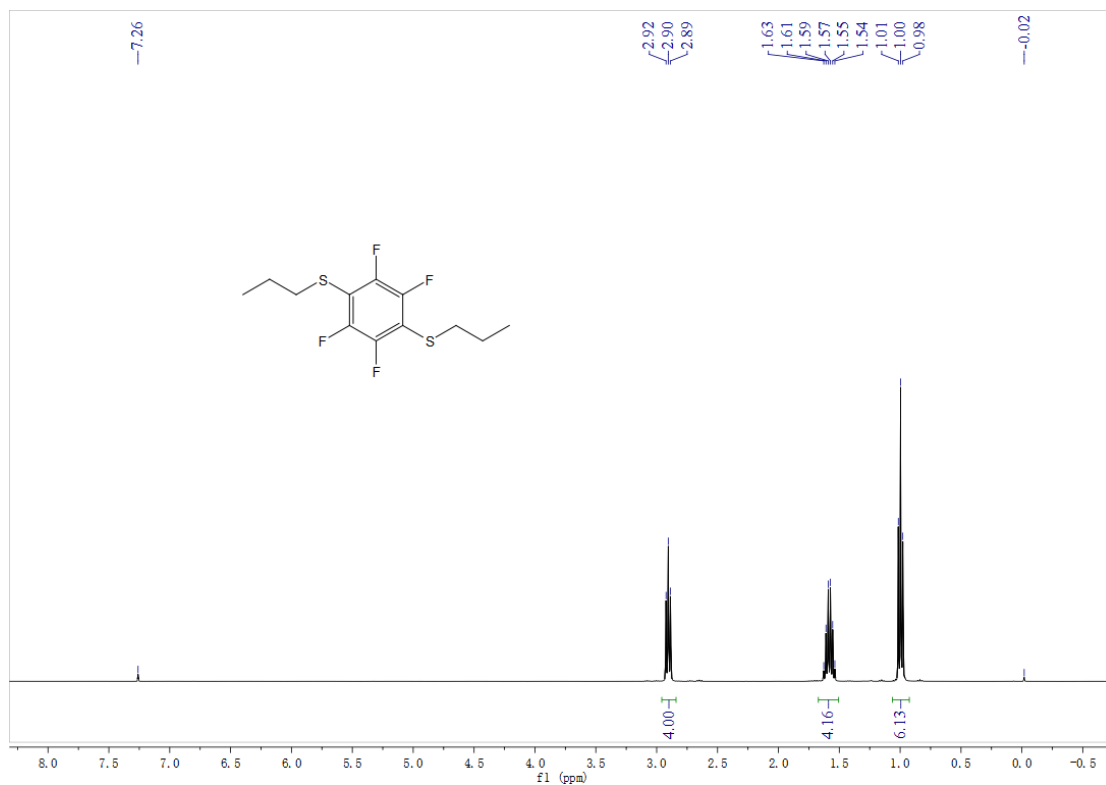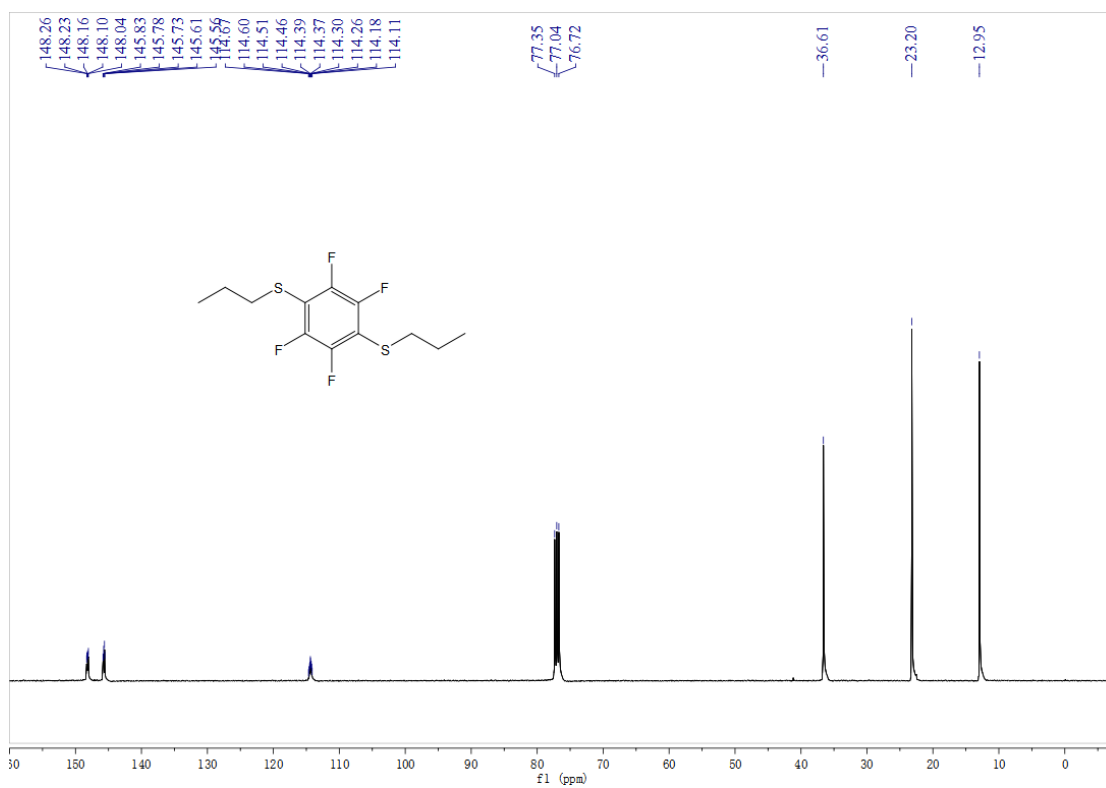

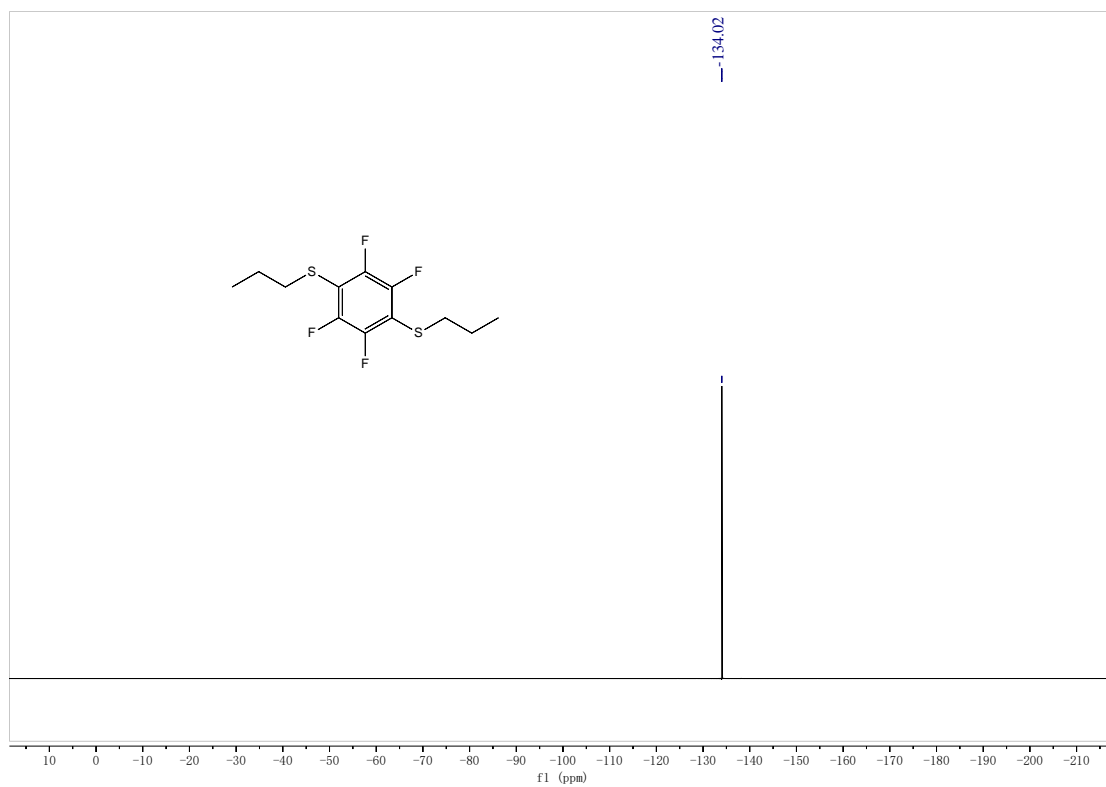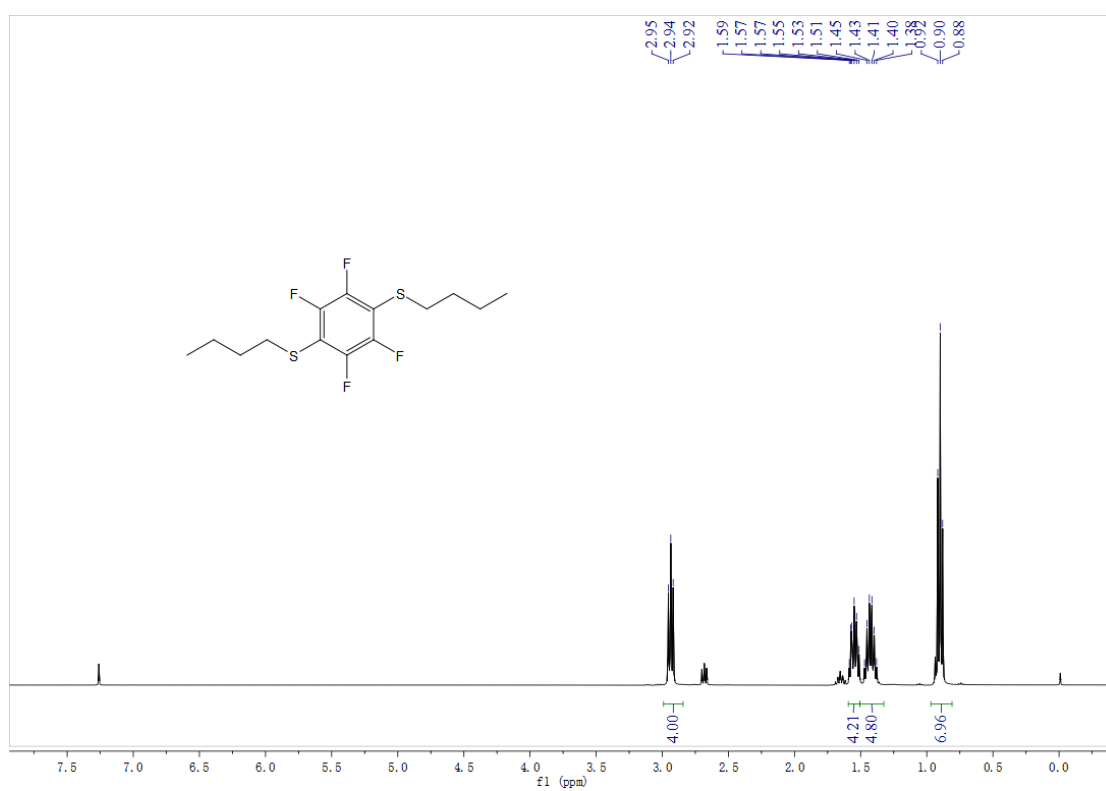

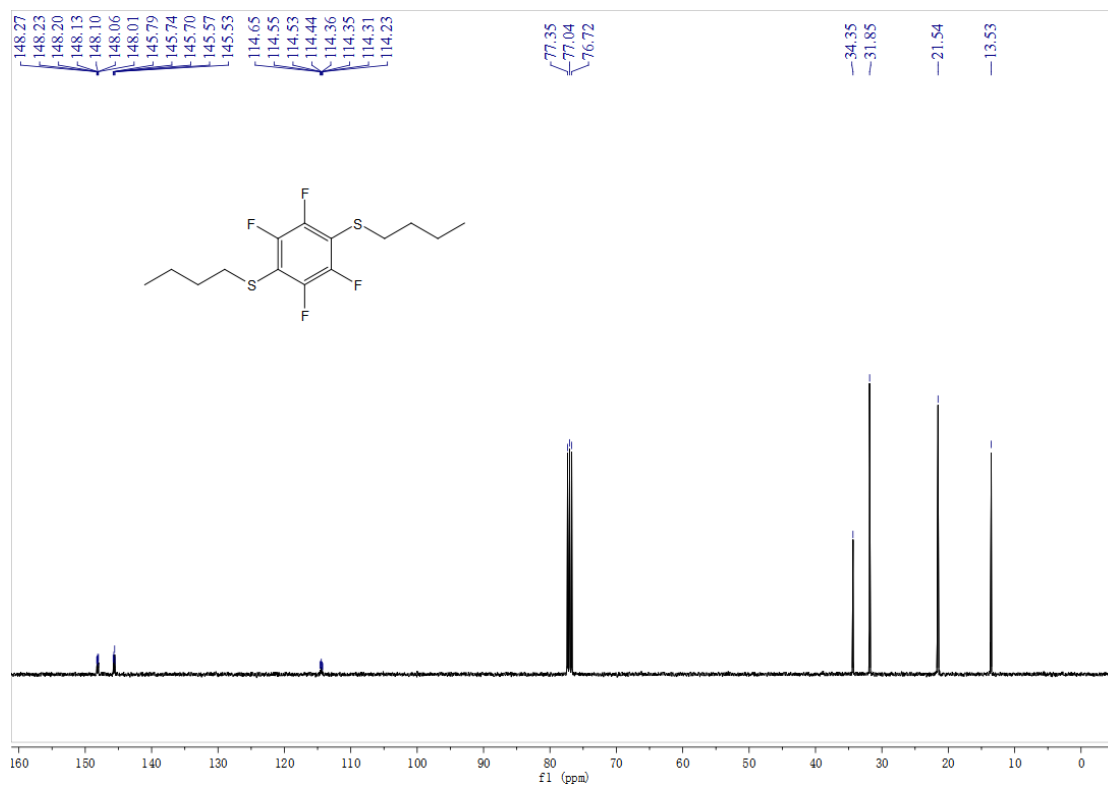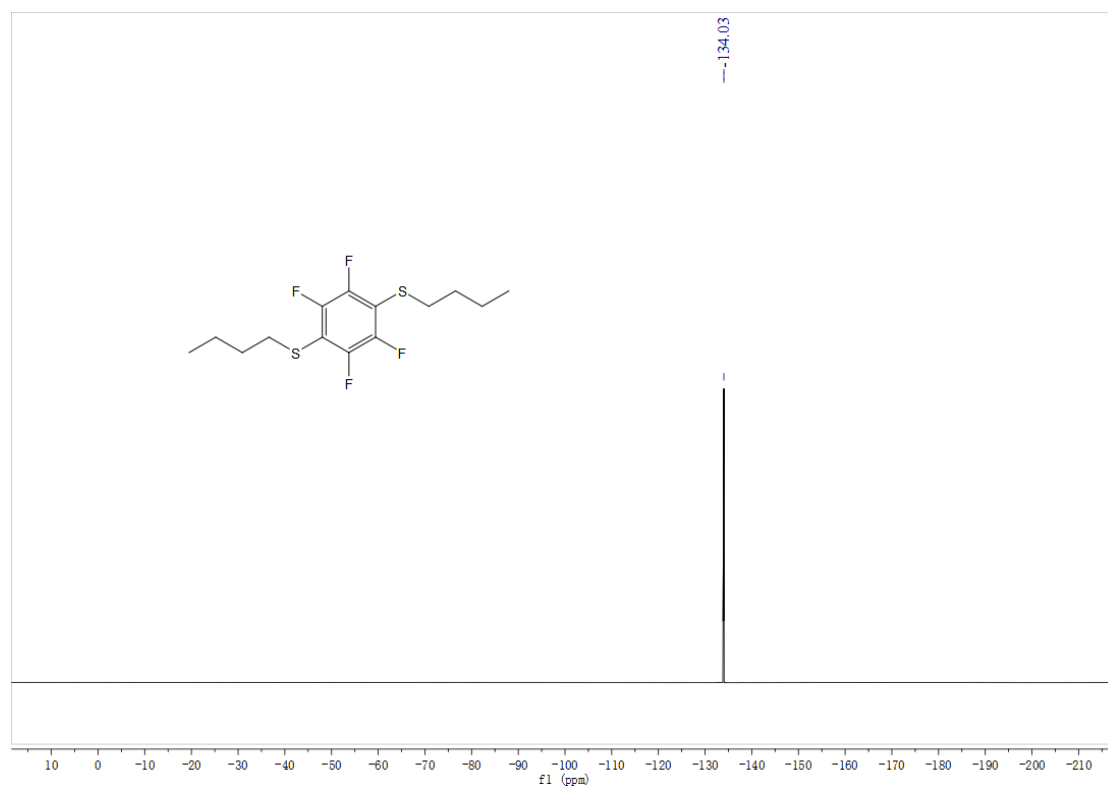

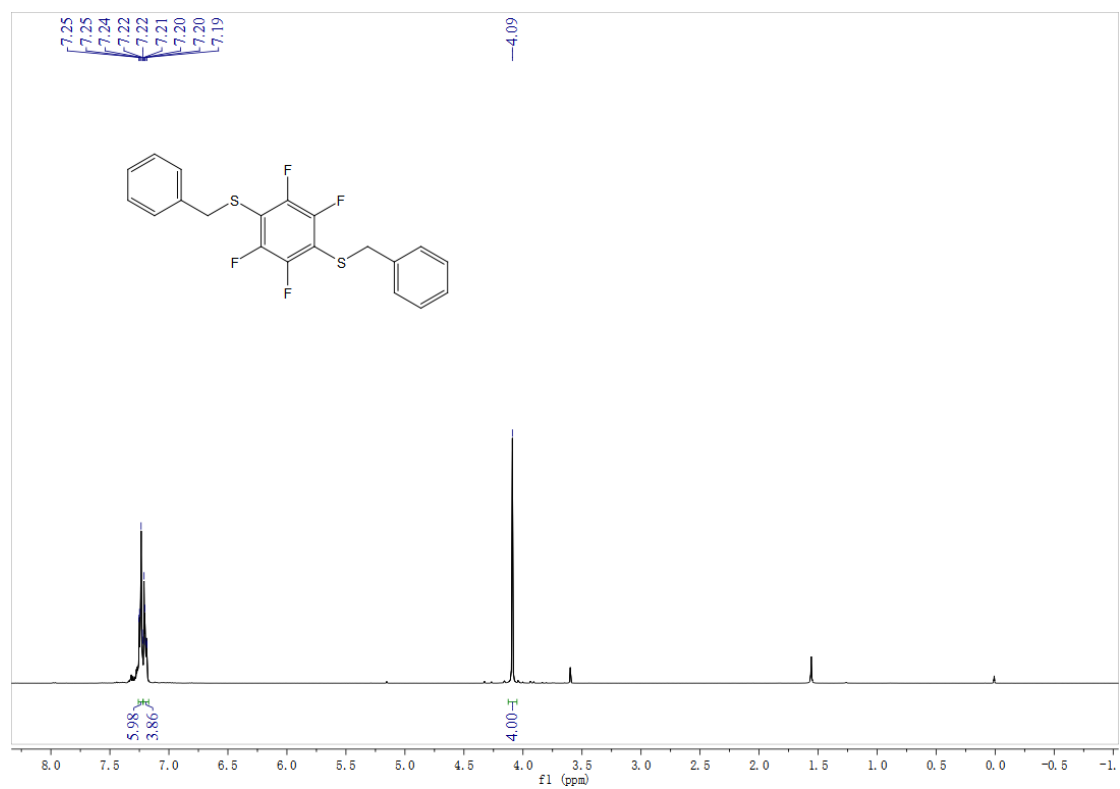

<sup>1</sup>H NMR (400 MHz, CDCl<sub>3</sub>): 1,4-bis(benzylthio)-2,3,5,6-tetrafluorobenzene (**3e**)

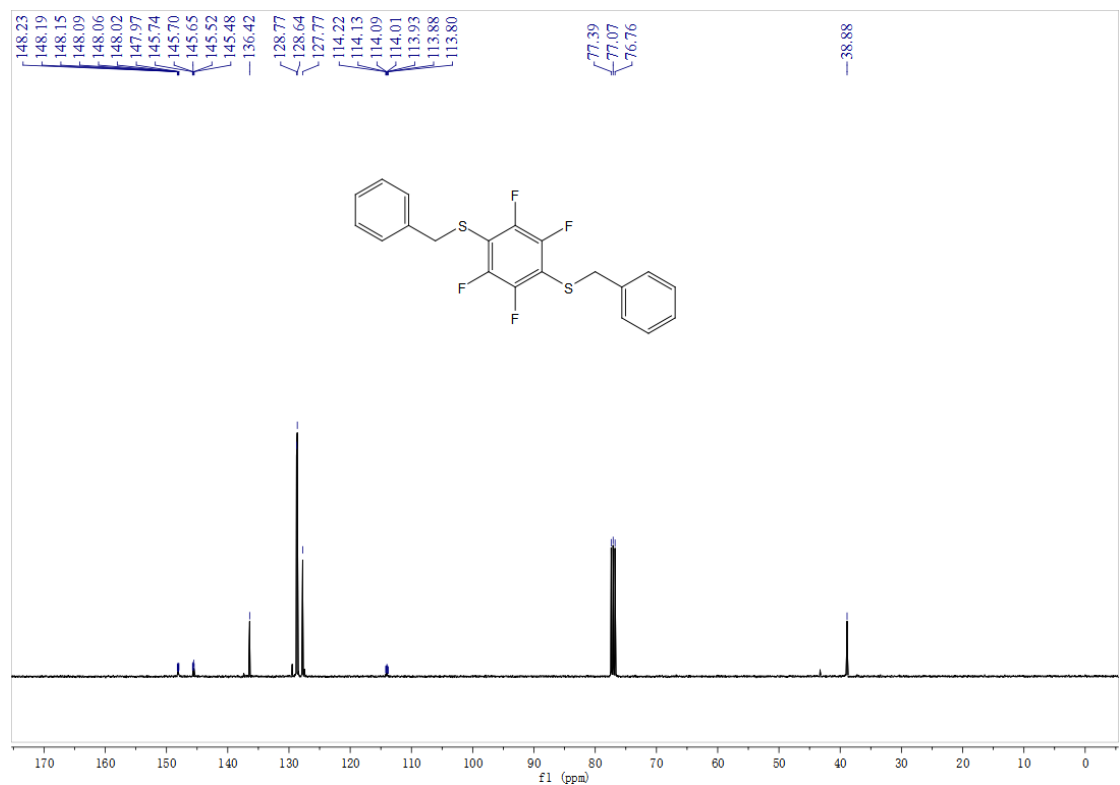

<sup>13</sup>C NMR (100 MHz, CDCl<sub>3</sub>): 1,4-bis(benzylthio)-2,3,5,6-tetrafluorobenzene (**3e**)

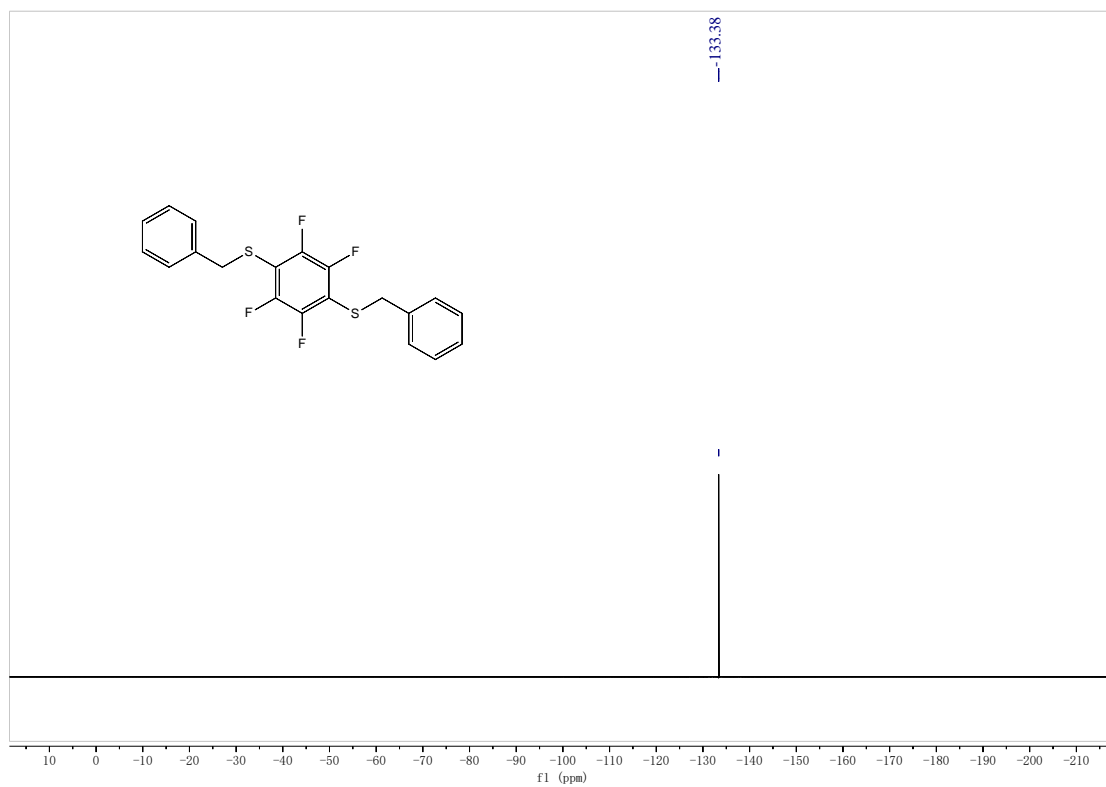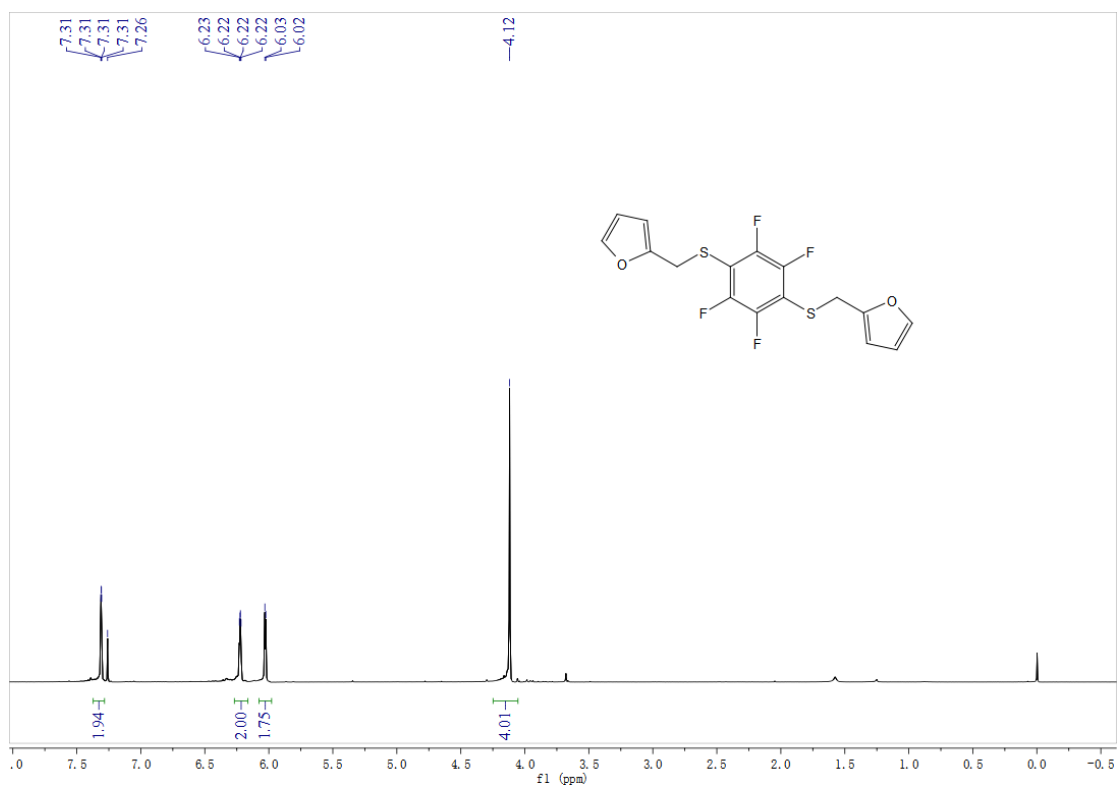



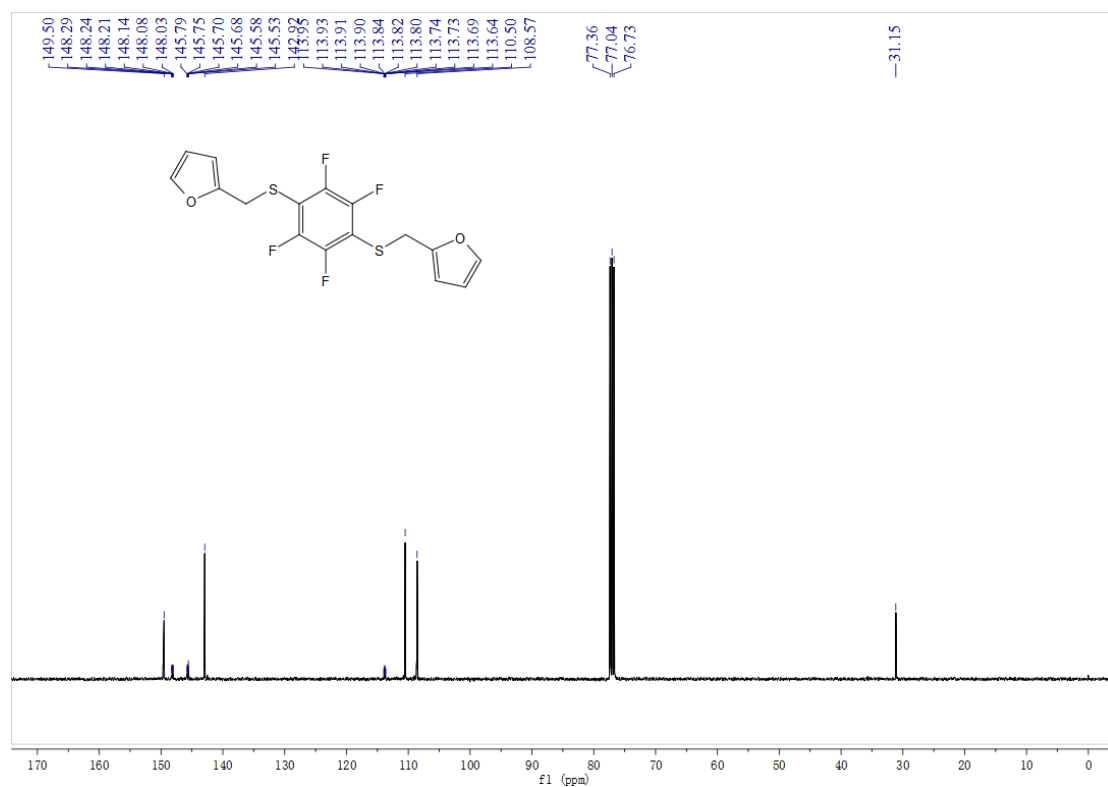

<sup>13</sup>C NMR (100 MHz, CDCl<sub>3</sub>): 1,4-bis(furfurylthio)-2,3,5,6-tetrafluorobenzene (3f)

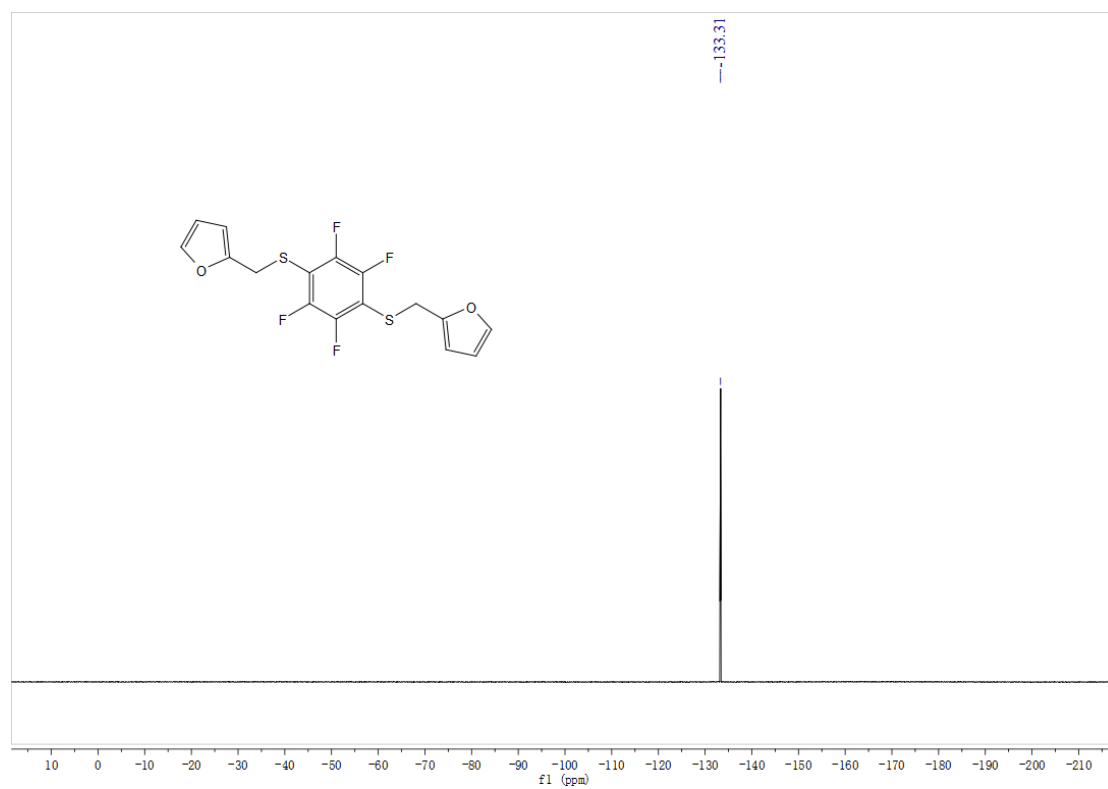

<sup>19</sup>F NMR (376 MHz, CDCl<sub>3</sub>): 1,4-bis(furfurylthio)-2,3,5,6-tetrafluorobenzene (3f)

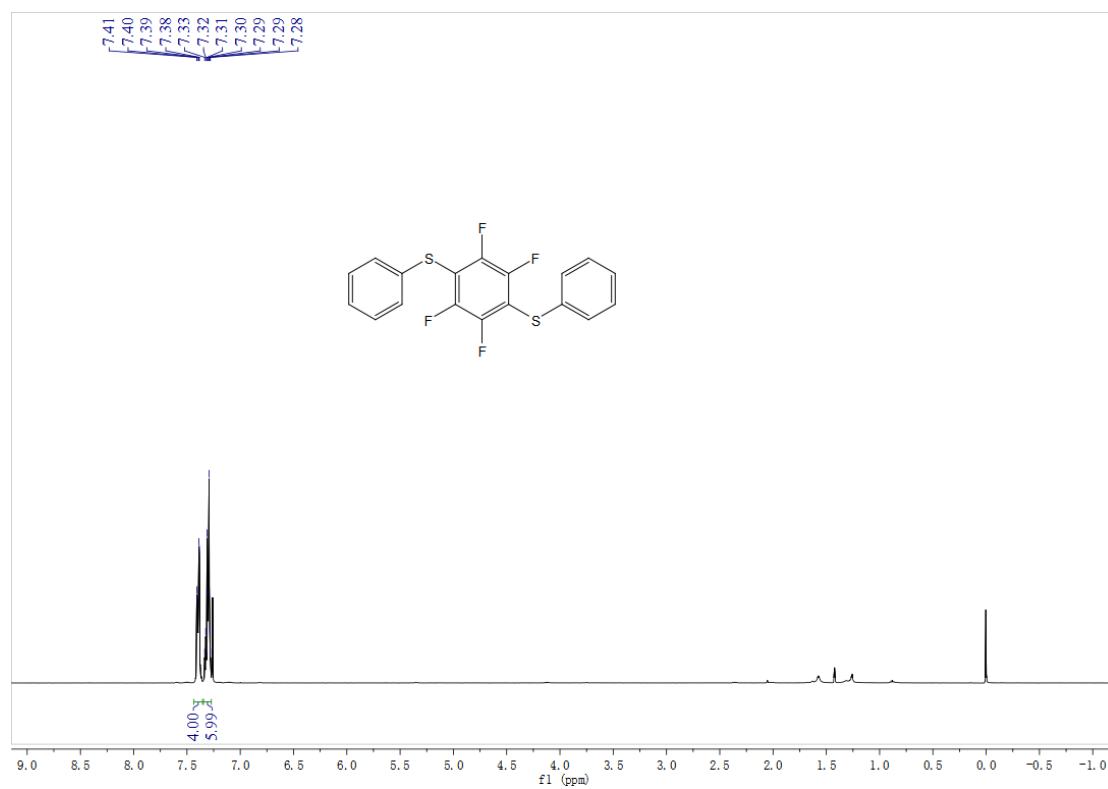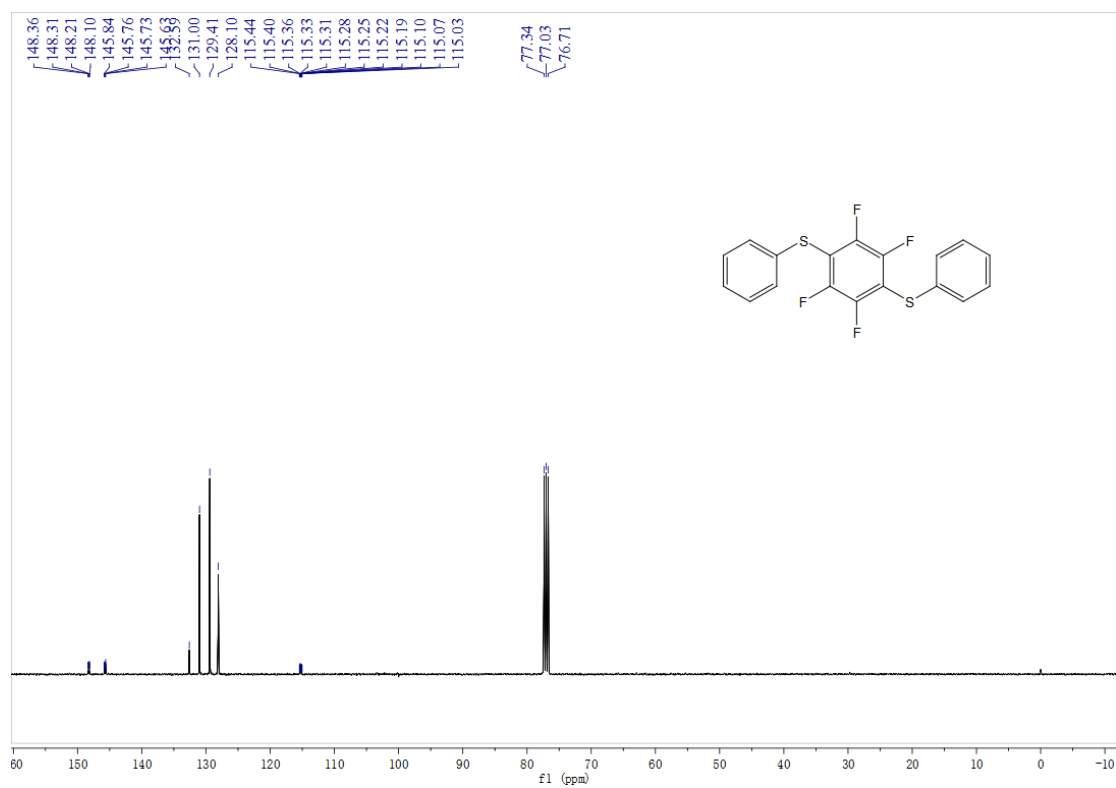

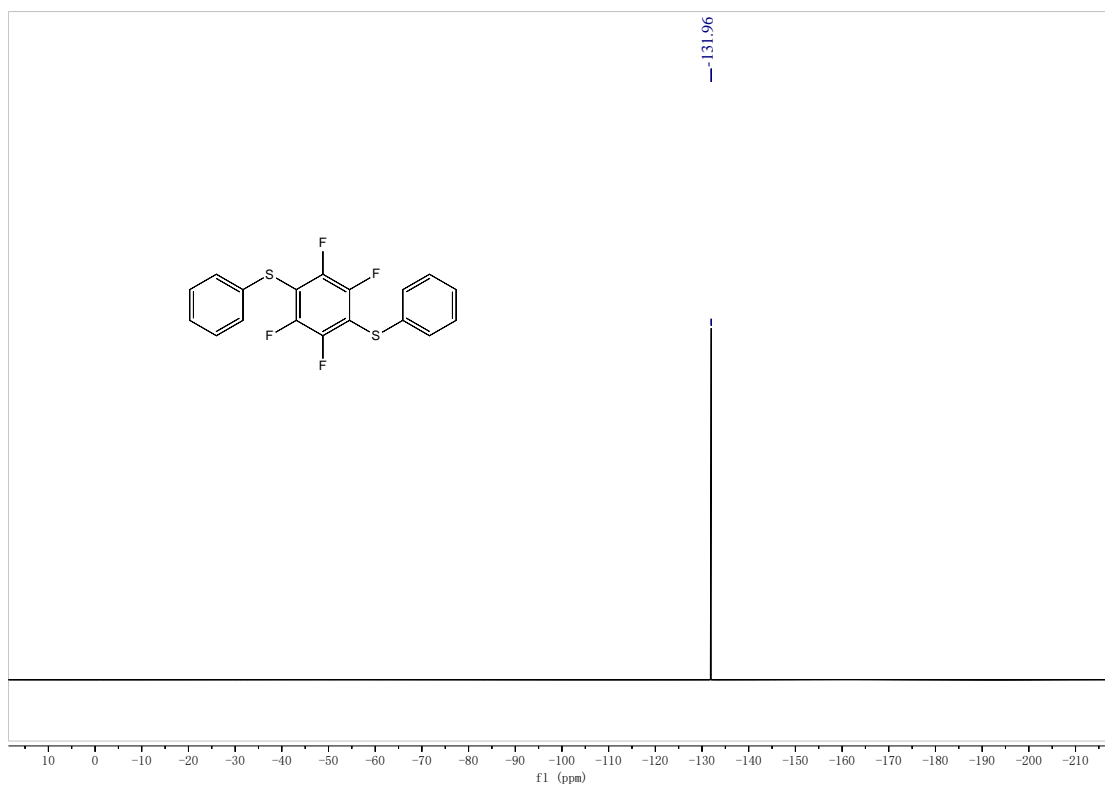

$^{19}\text{F}$  NMR (376 MHz,  $\text{CDCl}_3$ ): 1,4-bis(phenylthio)-2,3,5,6-tetrafluorobenzene (**3g**)

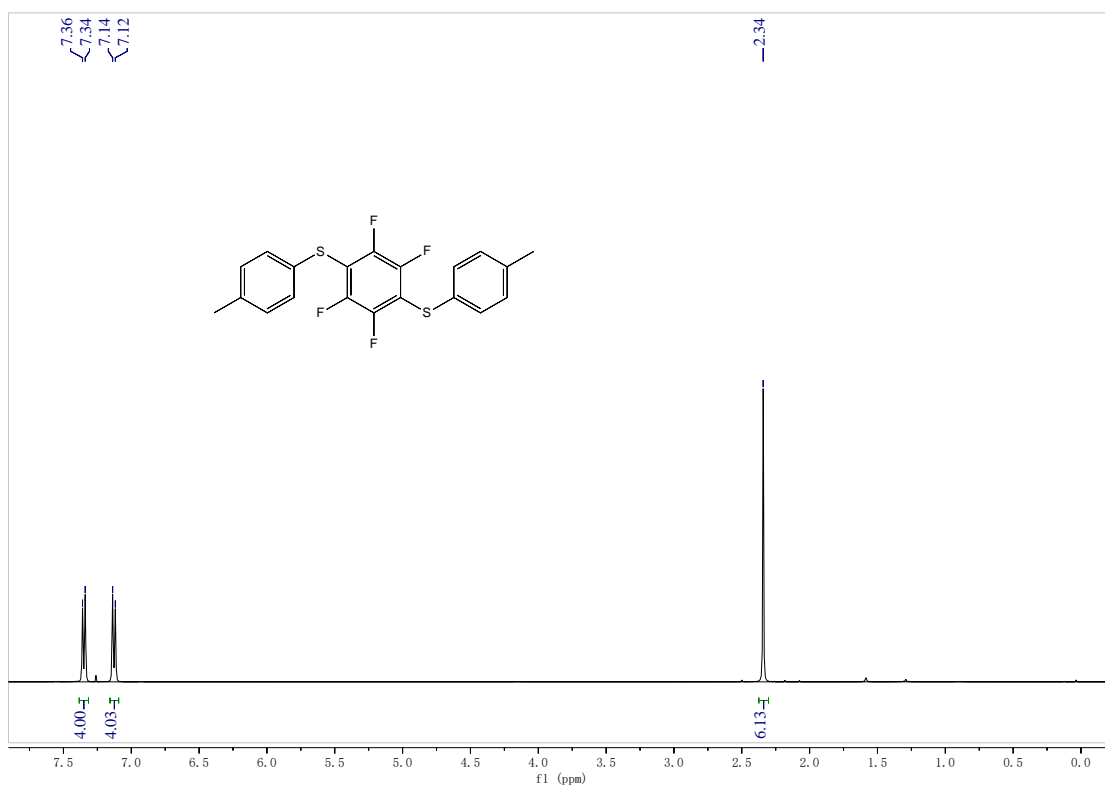

$^1\text{H}$  NMR (400 MHz,  $\text{CDCl}_3$ ): 1,4-bis(*p*-tolylthio)-2,3,5,6-tetrafluorobenzene (**3h**)

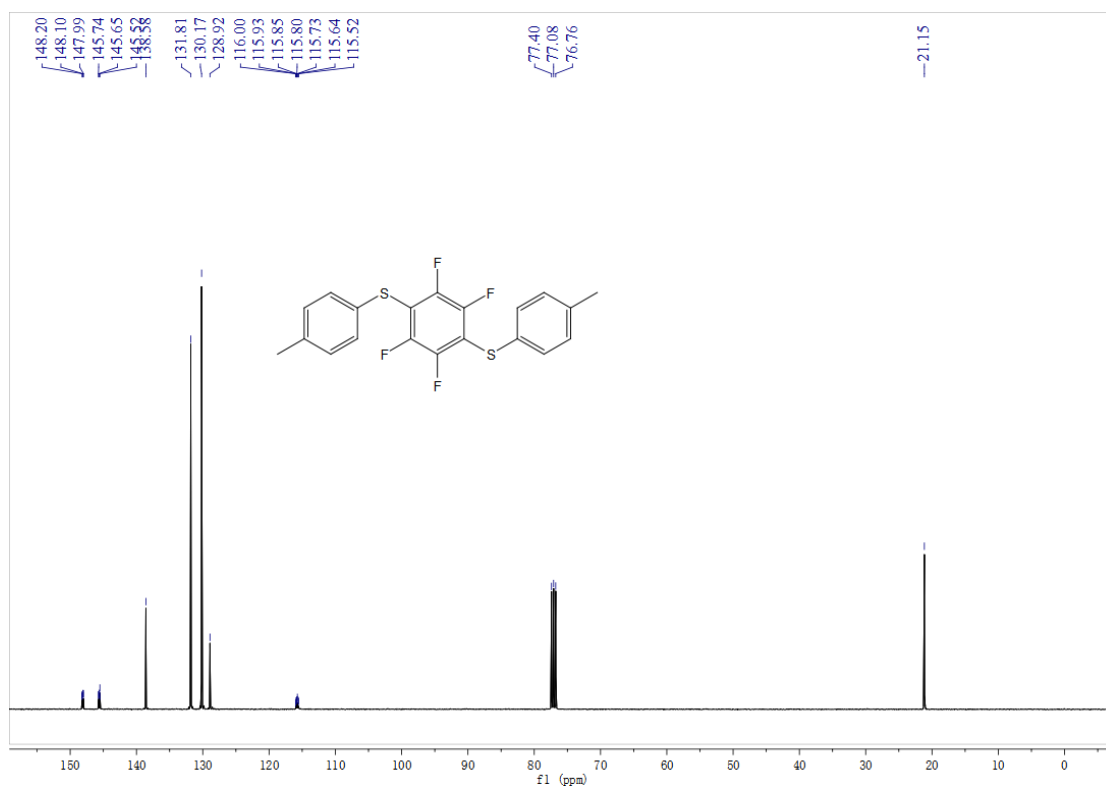

<sup>13</sup>C NMR (100 MHz, CDCl<sub>3</sub>): 1,4-bis(*p*-tolylthio)-2,3,5,6-tetrafluorobenzene (**3h**)

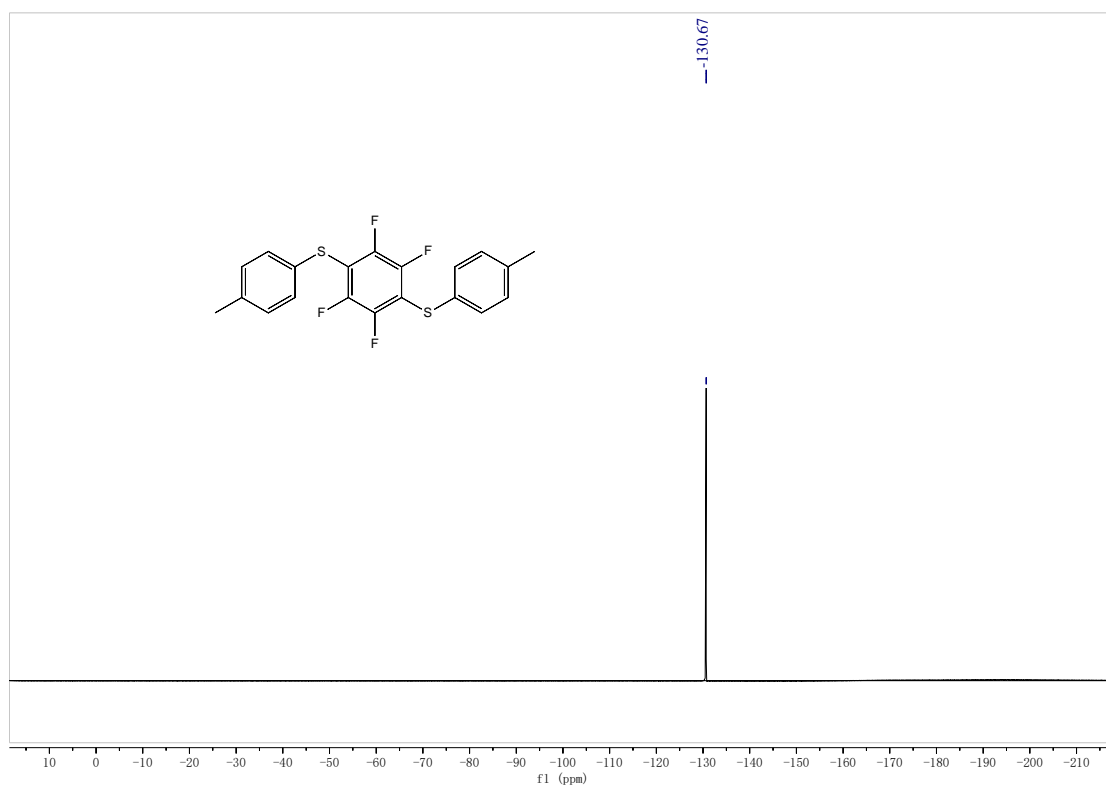

<sup>19</sup>F NMR (376 MHz, CDCl<sub>3</sub>): 1,4-bis(*p*-tolylthio)-2,3,5,6-tetrafluorobenzene (**3h**)

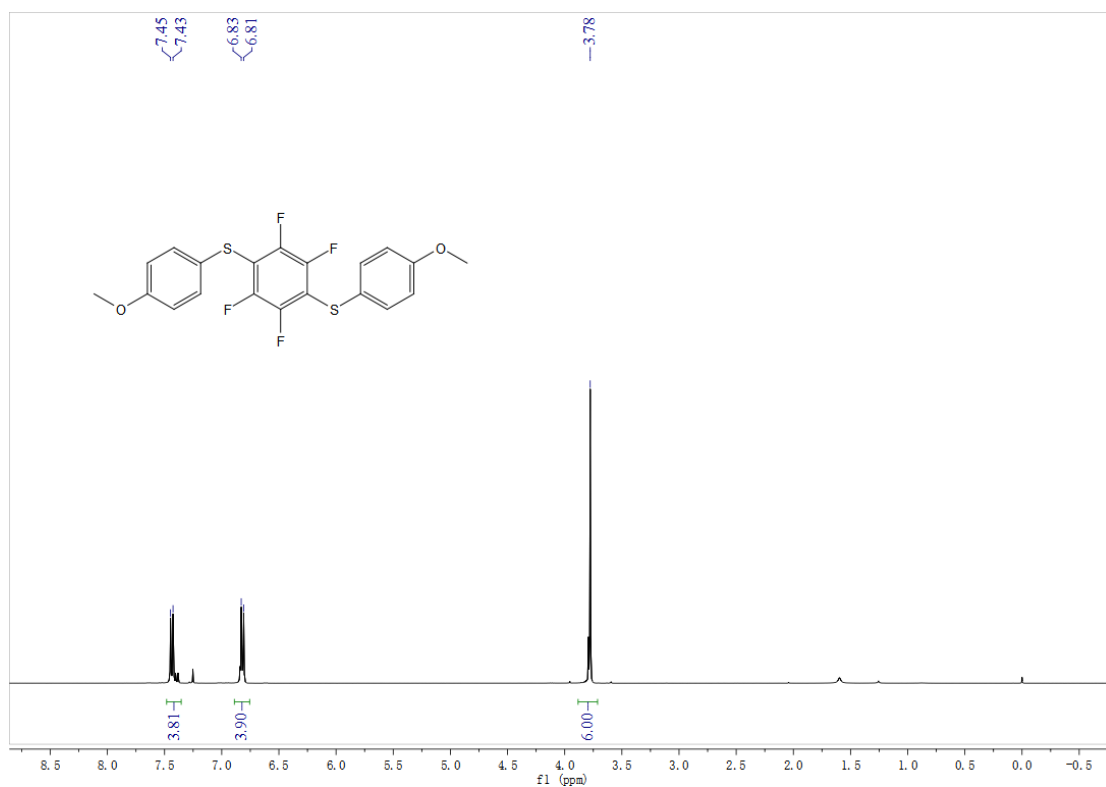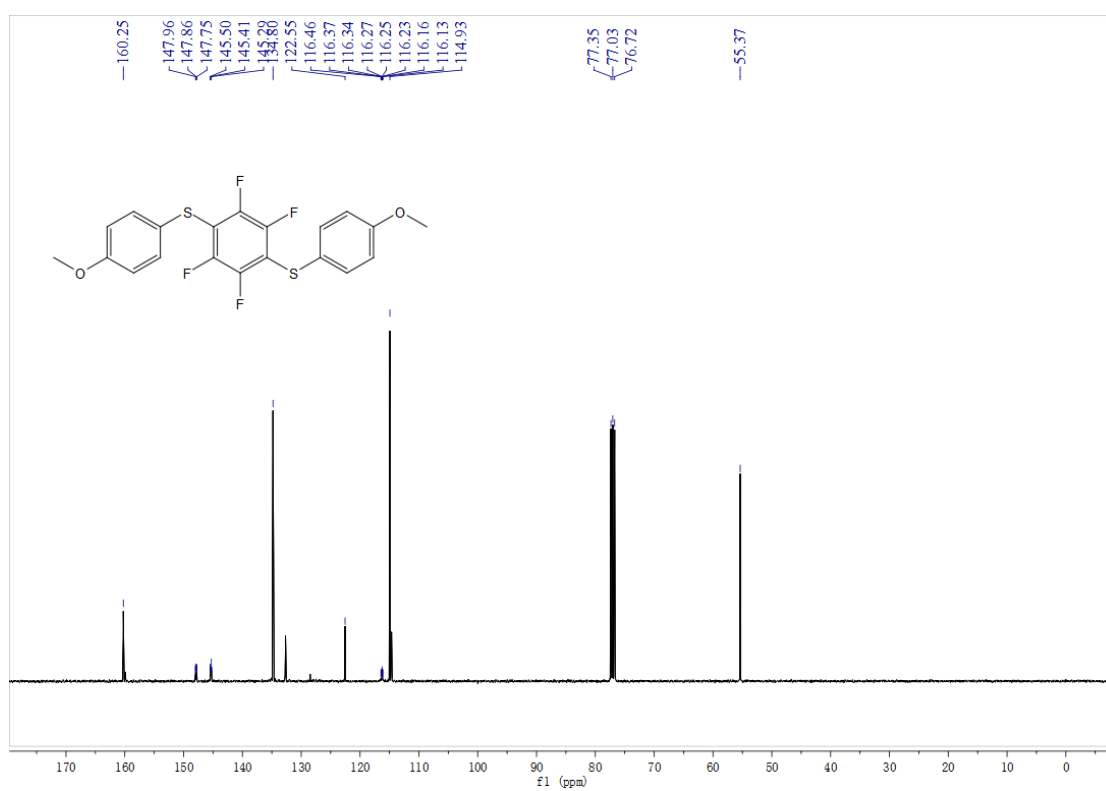

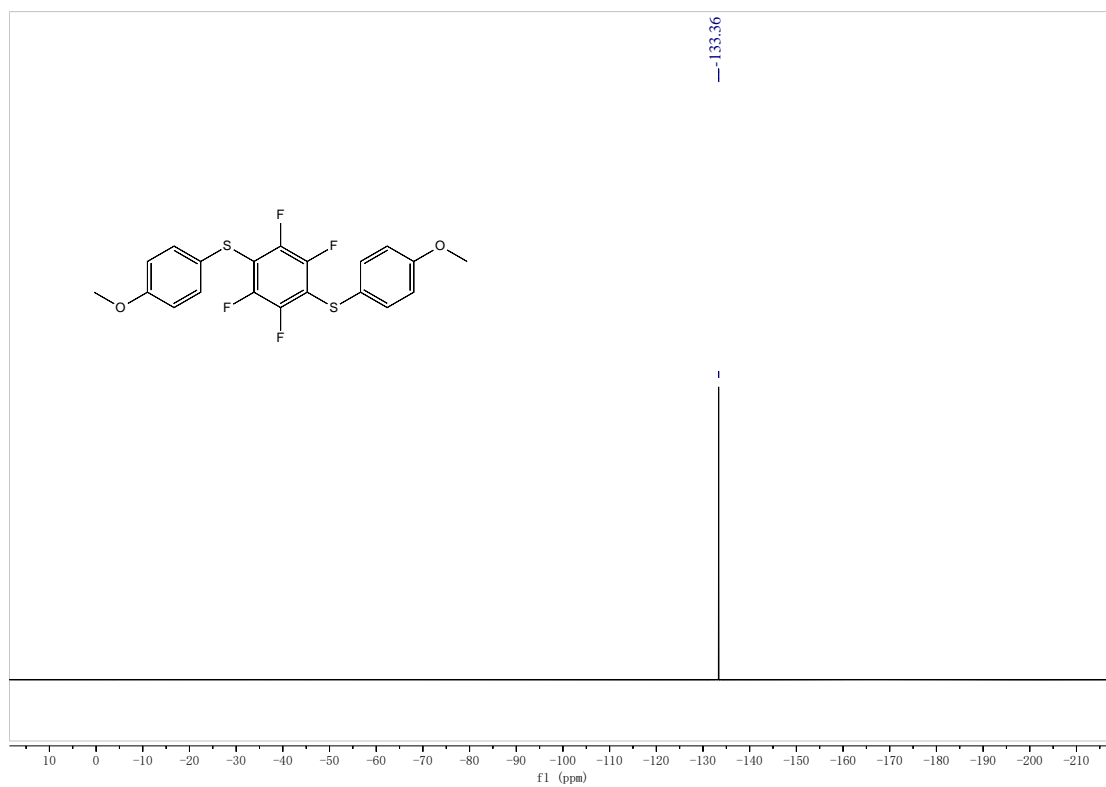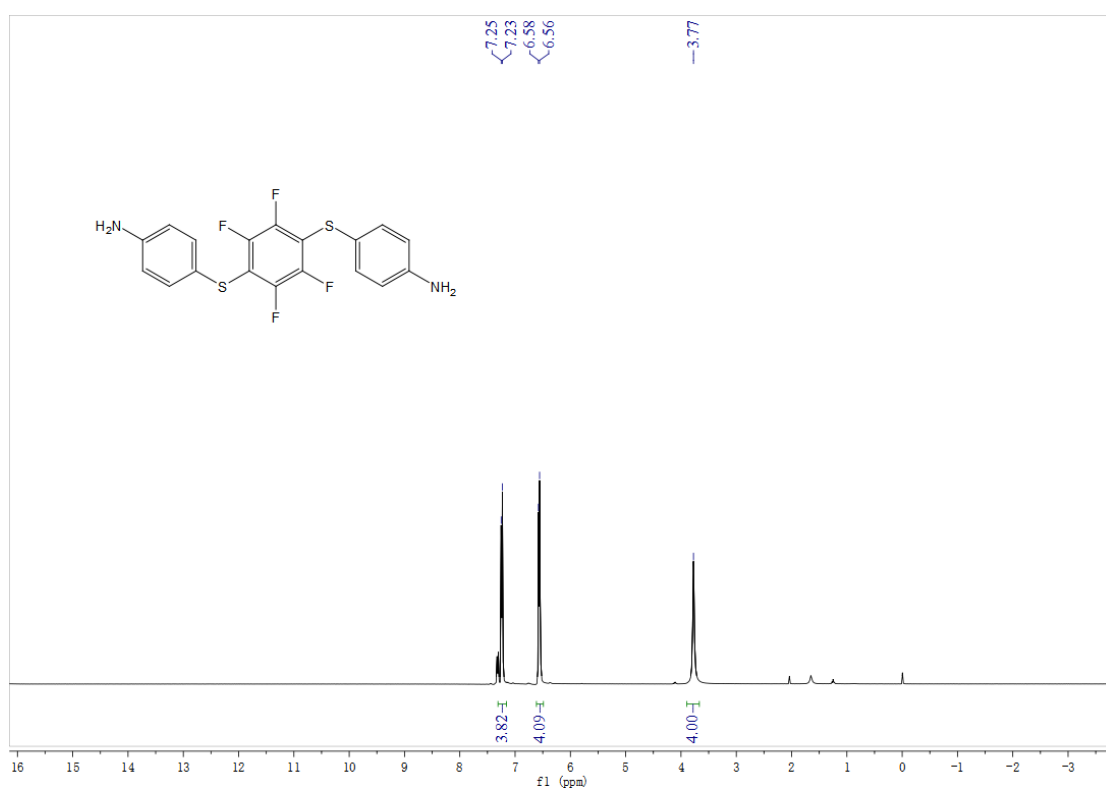

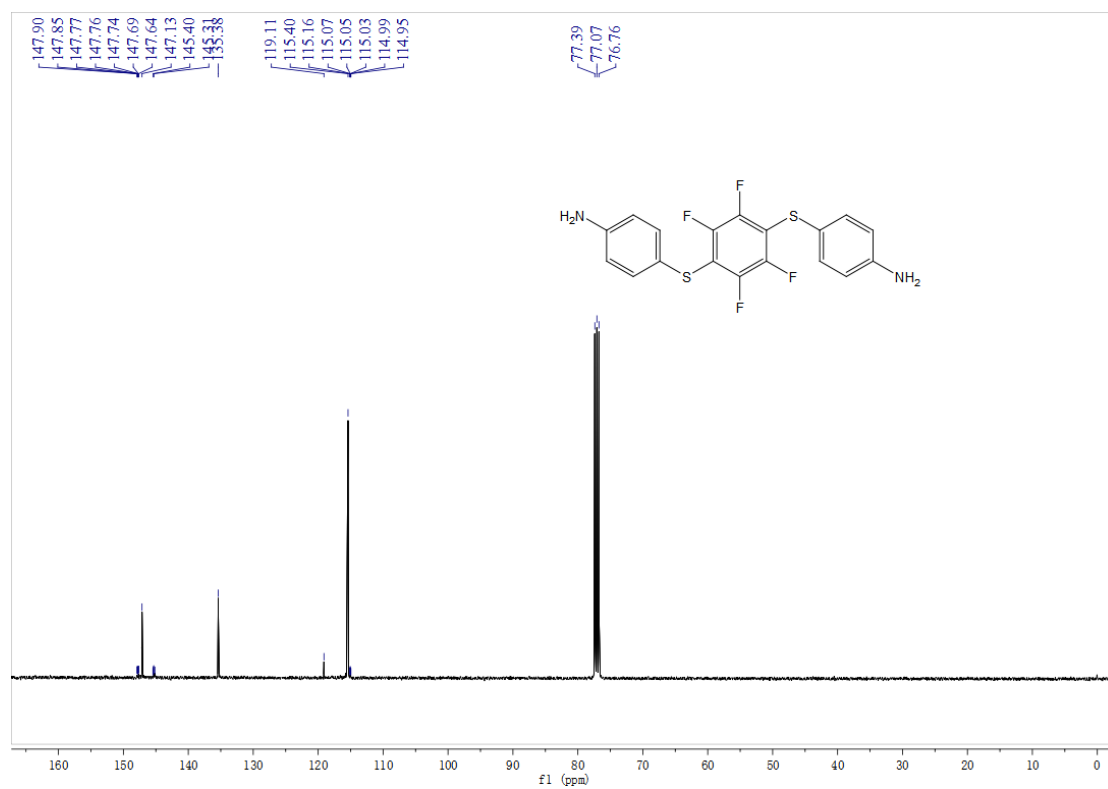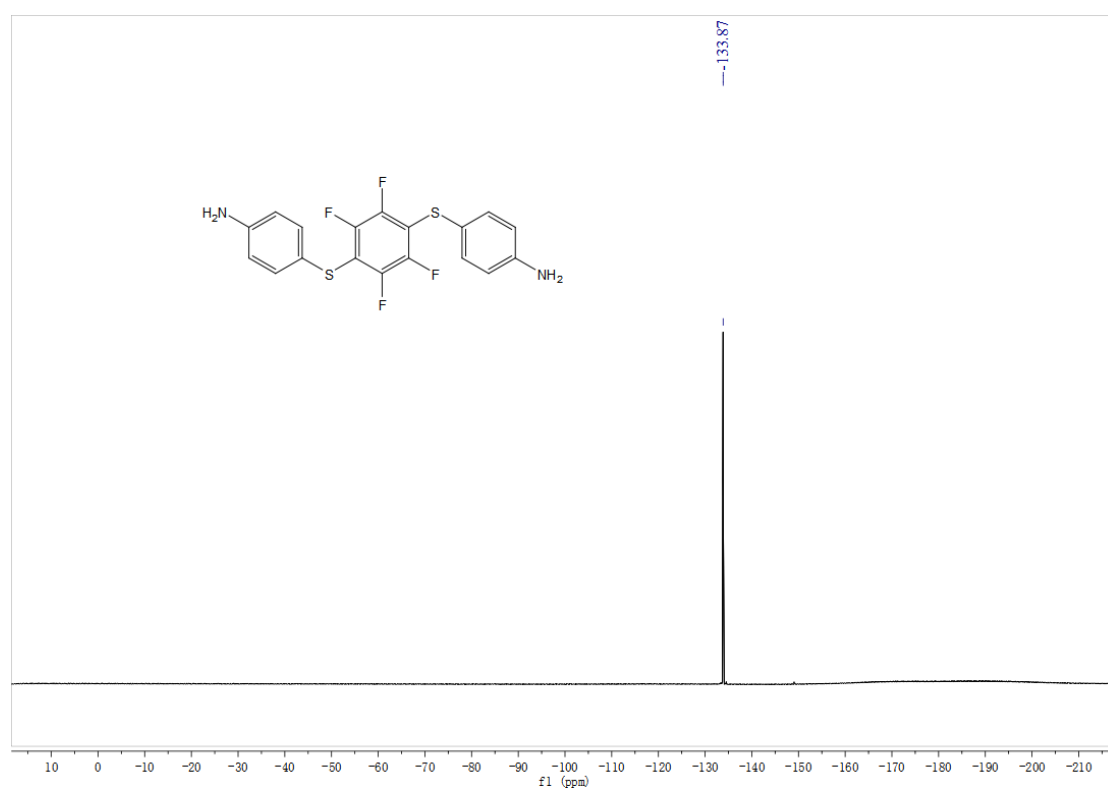

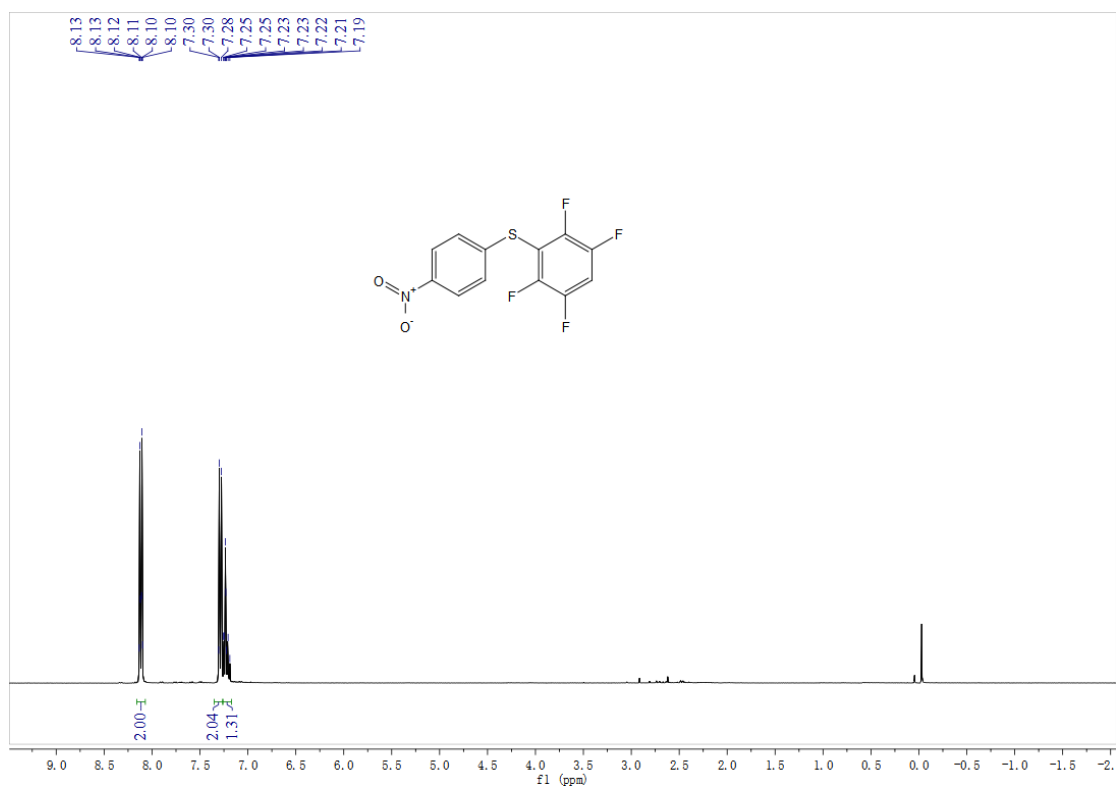

<sup>1</sup>H NMR (400 MHz, CDCl<sub>3</sub>): (4-nitrophenyl)(2,3,5,6-tetrafluorophenyl)sulfane (**3k**)

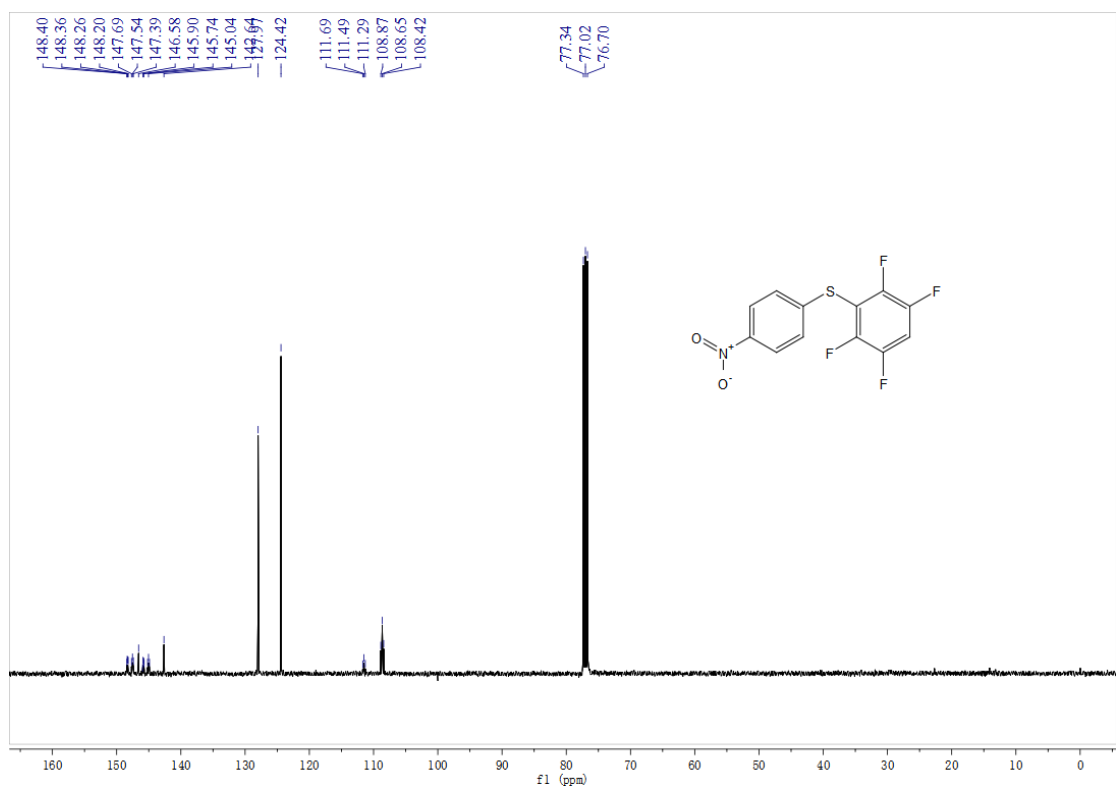

<sup>13</sup>C NMR (100 MHz, CDCl<sub>3</sub>): (4-nitrophenyl)(2,3,5,6-tetrafluorophenyl)sulfane (**3k**)



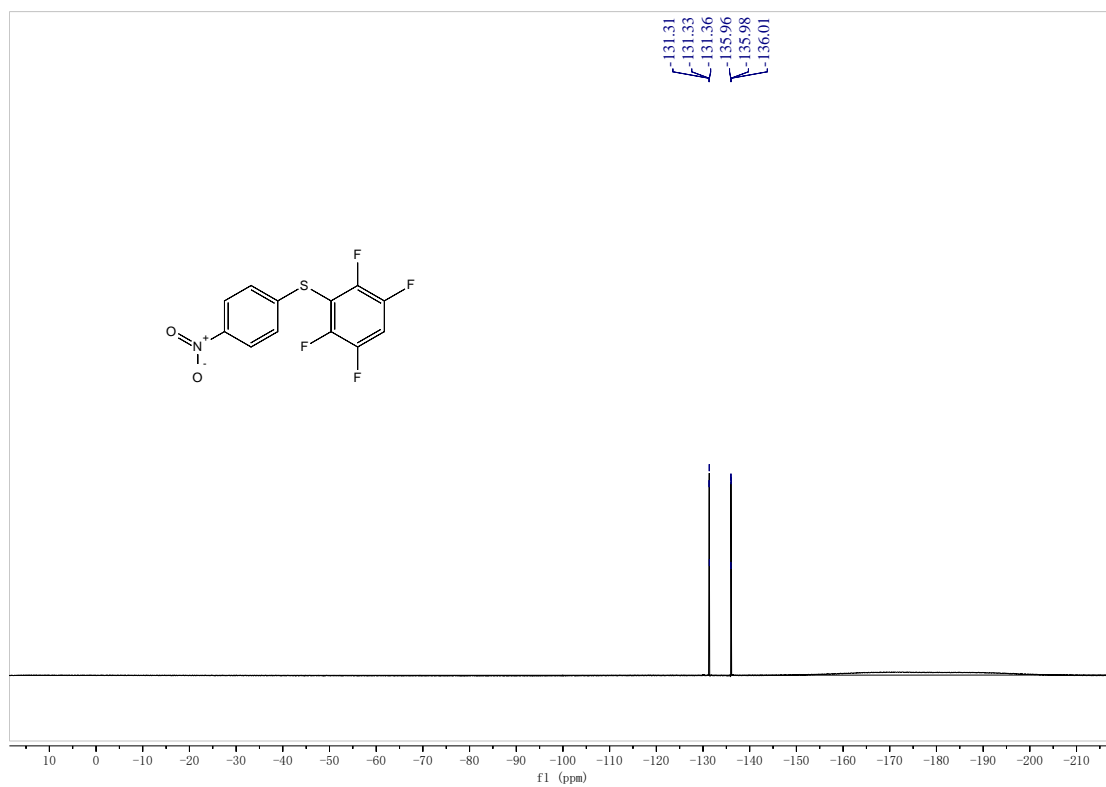

<sup>19</sup>F NMR (376 MHz, CDCl<sub>3</sub>): (4-nitrophenyl)(2,3,5,6-tetrafluorophenyl)sulfane (**3k**)

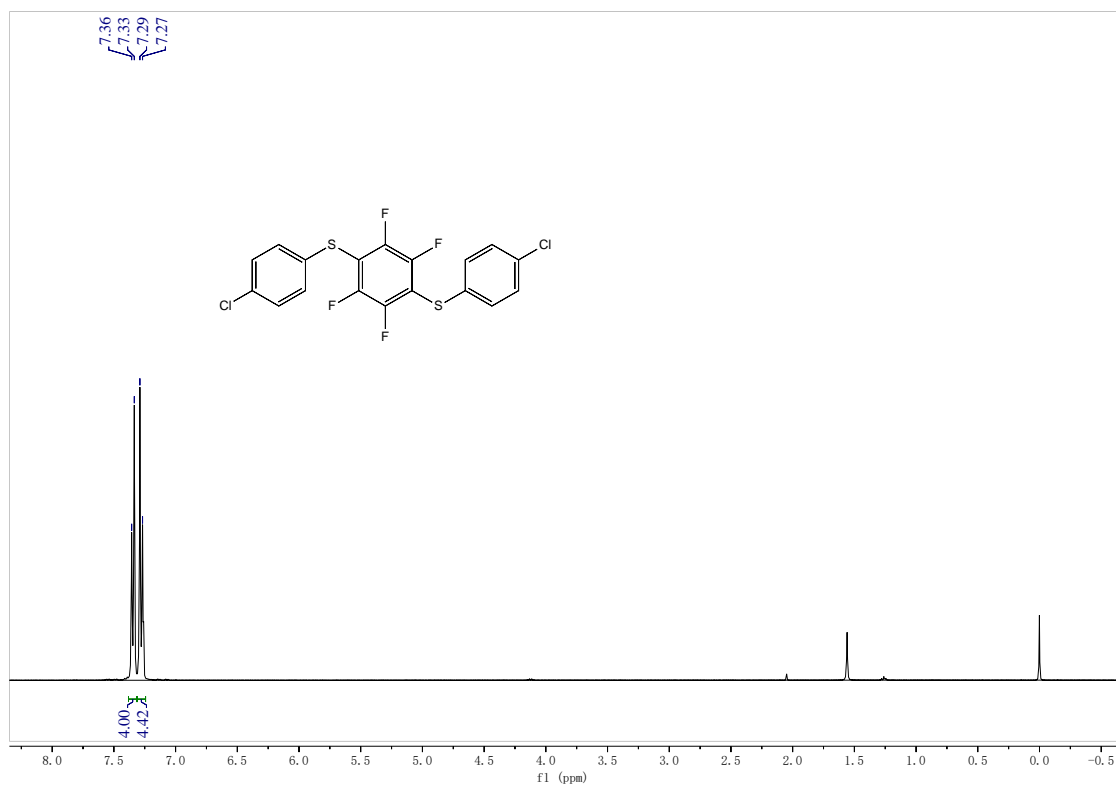

<sup>1</sup>H NMR (400 MHz, CDCl<sub>3</sub>): 1,4-bis(4-chlorophenylthio)-2,3,5,6-tetrafluoro-benzene (**3m**)

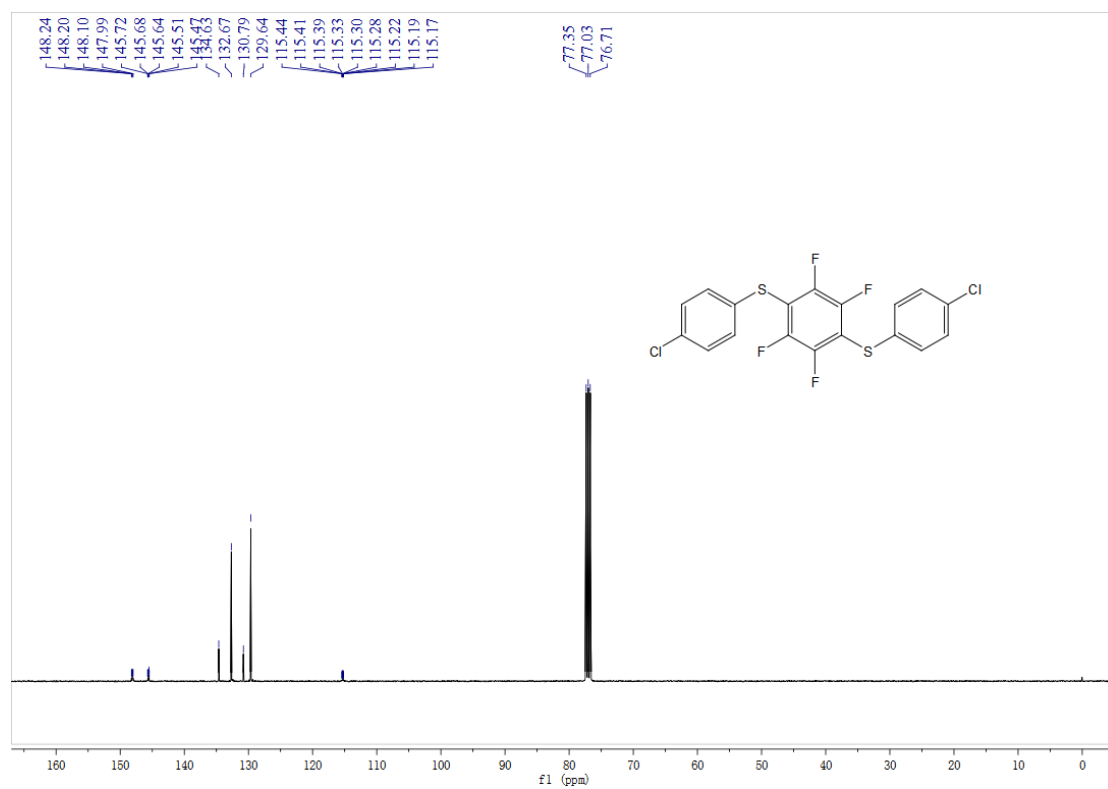

<sup>13</sup>C NMR (100 MHz, CDCl<sub>3</sub>): 1,4-bis(4-chlorophenylthio)-2,3,5,6-tetrafluoro-benzene (**3m**)

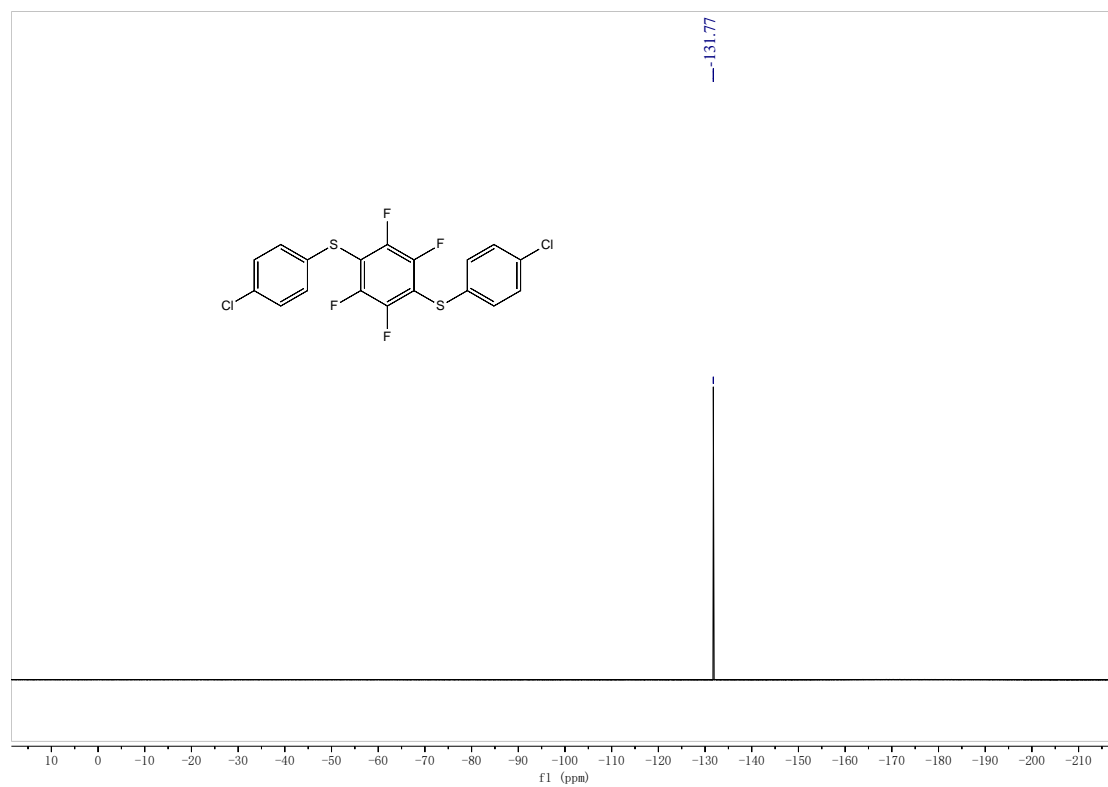

<sup>19</sup>F NMR (376 MHz, CDCl<sub>3</sub>): 1,4-bis(4-chlorophenylthio)-2,3,5,6-tetrafluoro-benzene (**3m**)

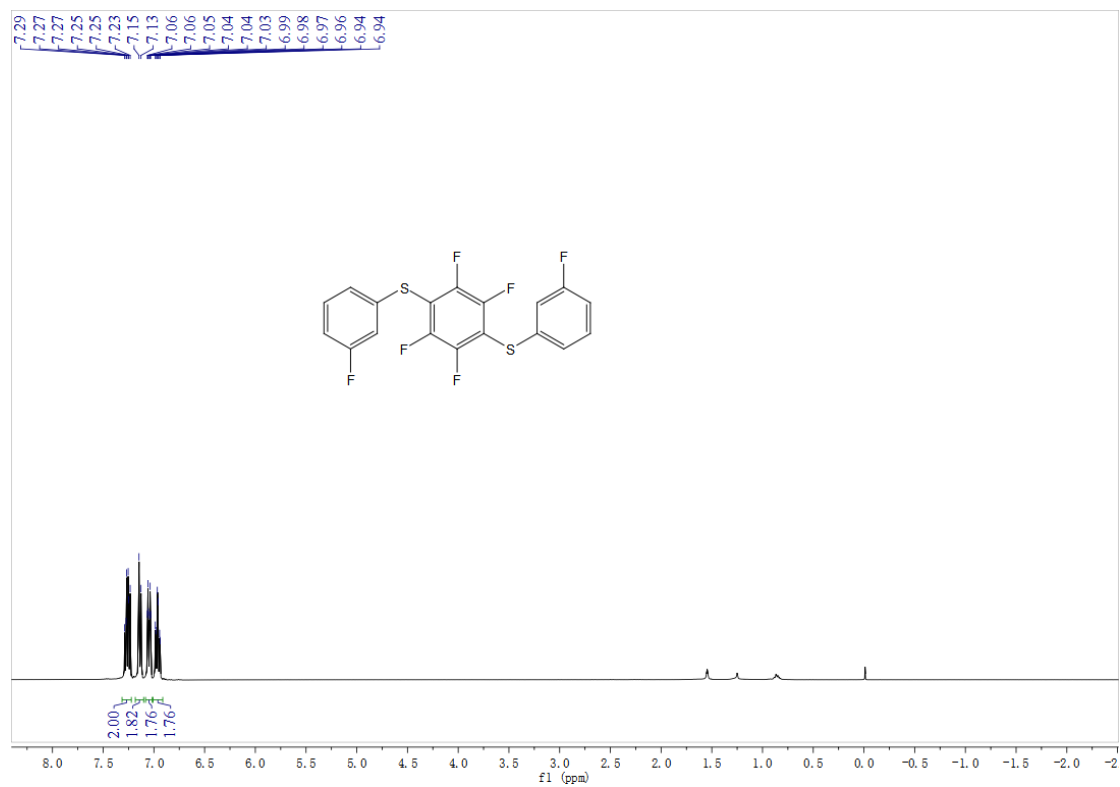

<sup>1</sup>H NMR (400 MHz, CDCl<sub>3</sub>): 1,4-bis(3-fluorophenylthio)-2,3,5,6-tetrafluorobenzene (**3n**)

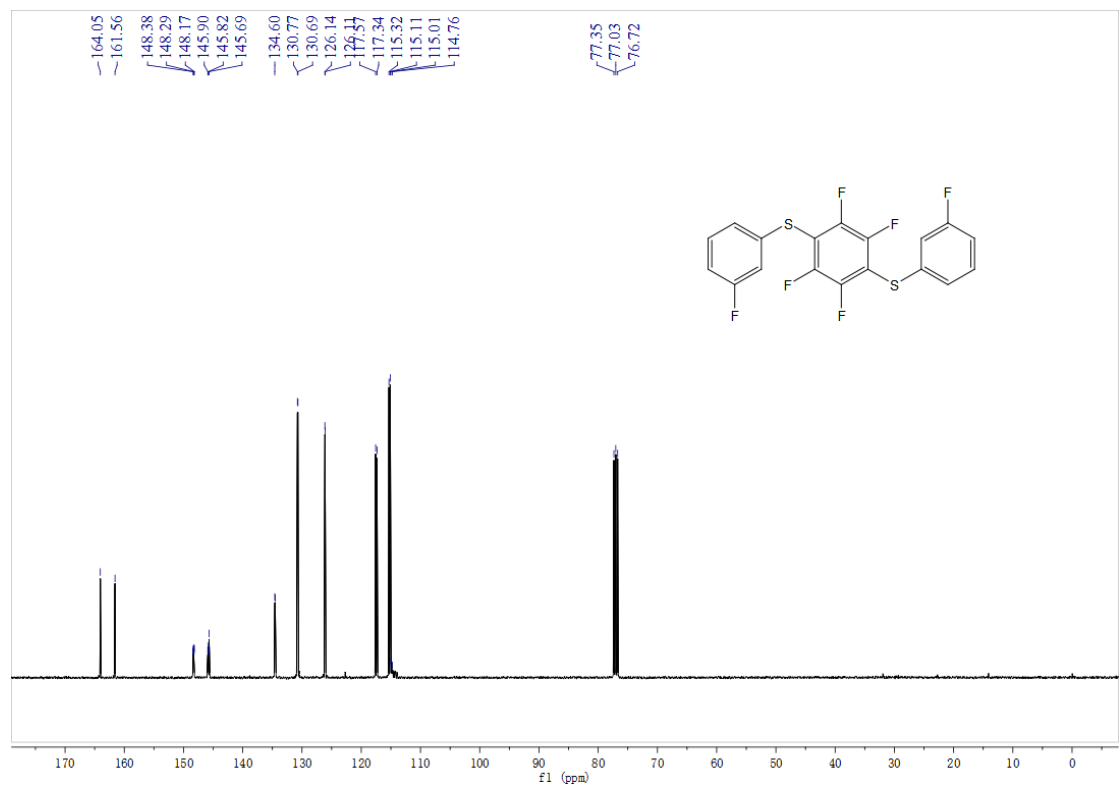

<sup>13</sup>C NMR (100 MHz, CDCl<sub>3</sub>): 1,4-bis(3-fluorophenylthio)-2,3,5,6-tetrafluorobenzene (**3n**)

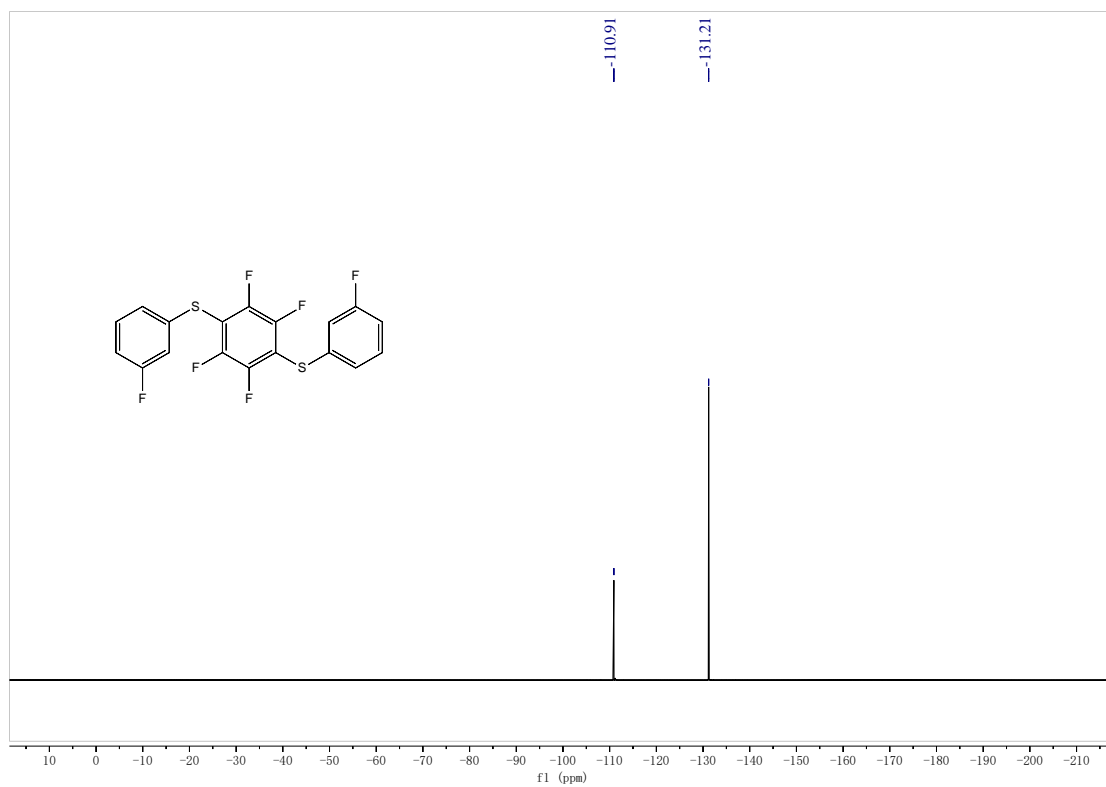

$^{19}\text{F}$  NMR (376 MHz,  $\text{CDCl}_3$ ): 1,4-bis(3-fluorophenylthio)-2,3,5,6-tetrafluorobenzene (**3n**)

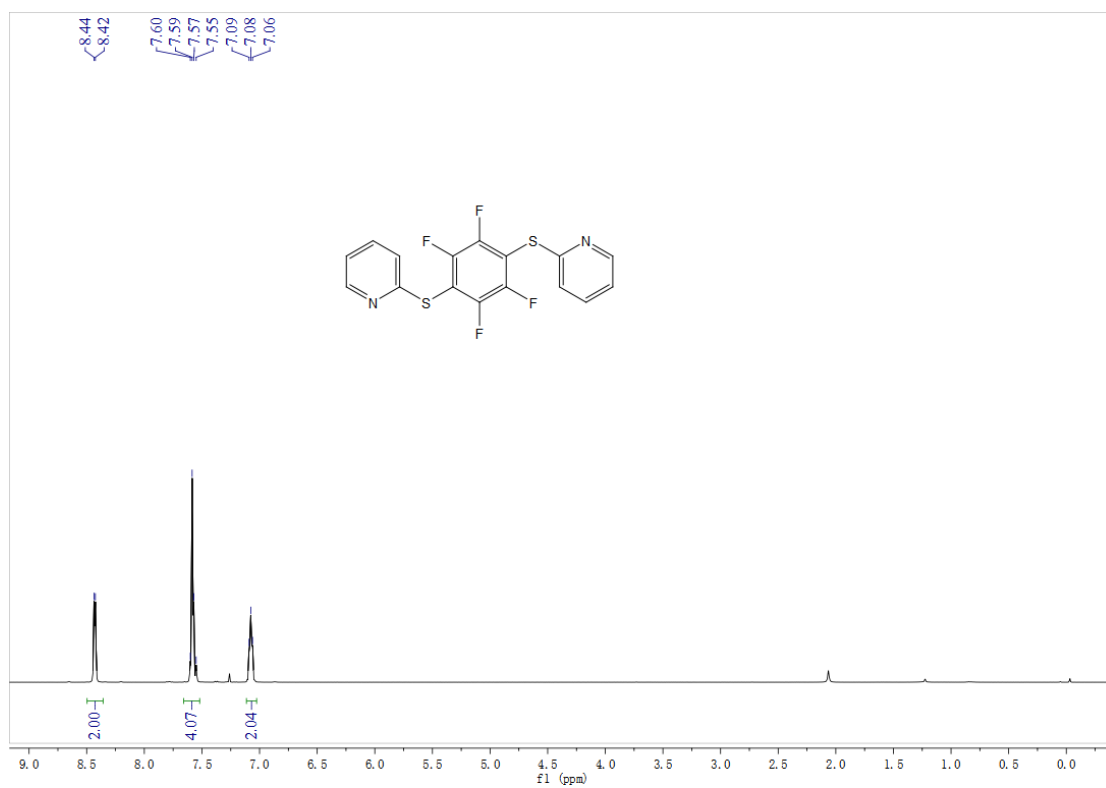

$^1\text{H}$  NMR (400 MHz,  $\text{CDCl}_3$ ): 2,3,5,6-tetrafluoro-1,4-bis(2-pyridylsulfenyl)benzene (**3o**)

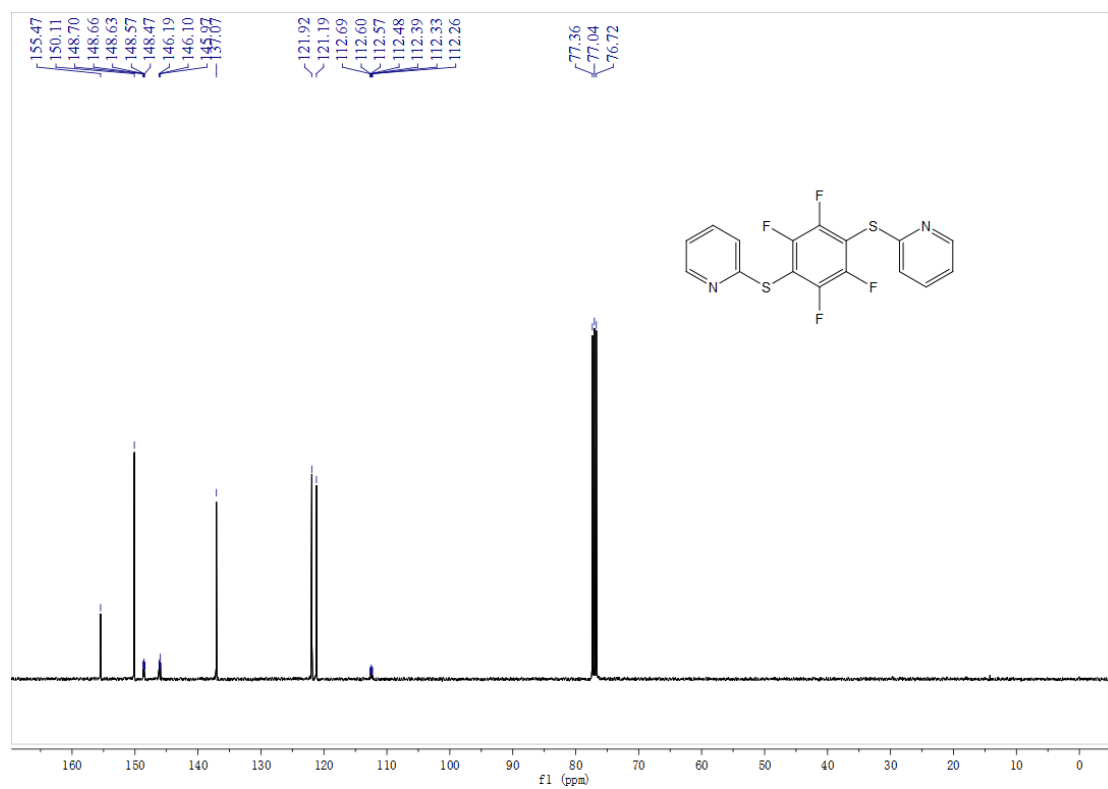

<sup>13</sup>C NMR (100 MHz, CDCl<sub>3</sub>): 2,3,5,6-tetrafluoro-1,4-bis(2-pyridylsulfenyl)benzene (**30**)

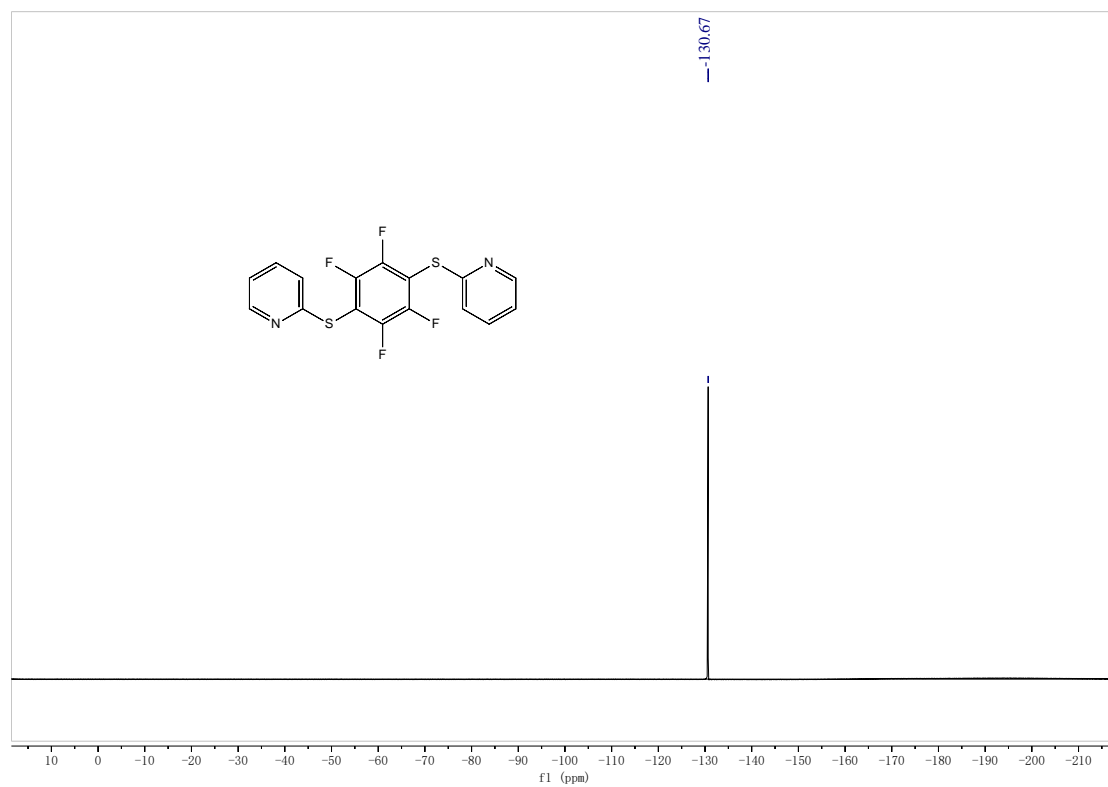

<sup>19</sup>F NMR (376 MHz, CDCl<sub>3</sub>): 2,3,5,6-tetrafluoro-1,4-bis(2-pyridylsulfenyl)benzene (**30**)

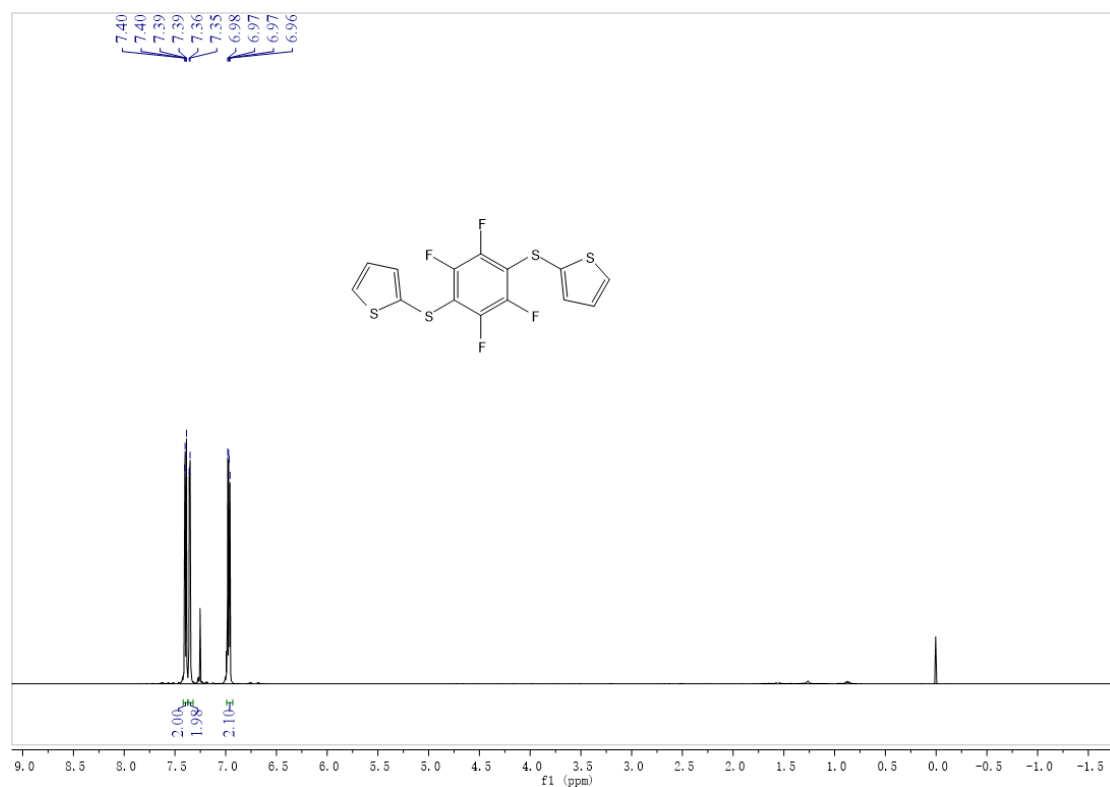

<sup>1</sup>H NMR (400 MHz, CDCl<sub>3</sub>): 2,3,5,6-tetrafluoro-1,4-bis(2-thienylsulfenyl)benzene (**3p**)

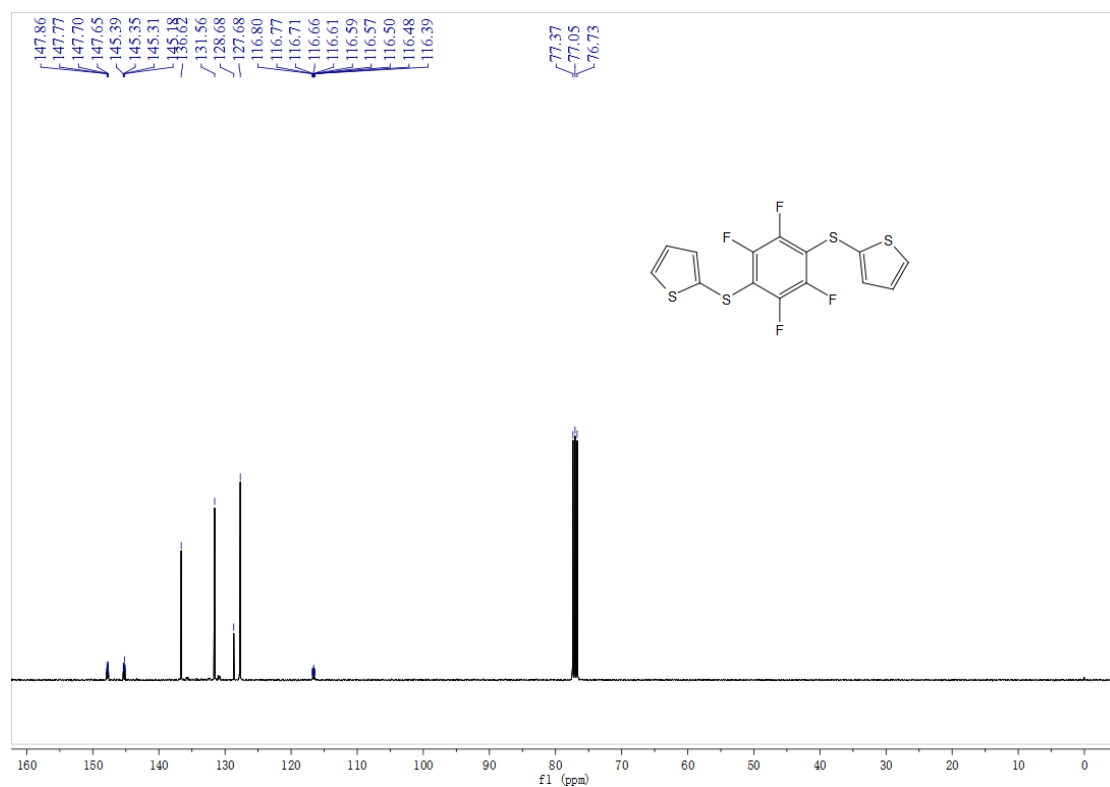

<sup>13</sup>C NMR (100 MHz, CDCl<sub>3</sub>): 2,3,5,6-tetrafluoro-1,4-bis(2-thienylsulfenyl)benzene (**3p**)

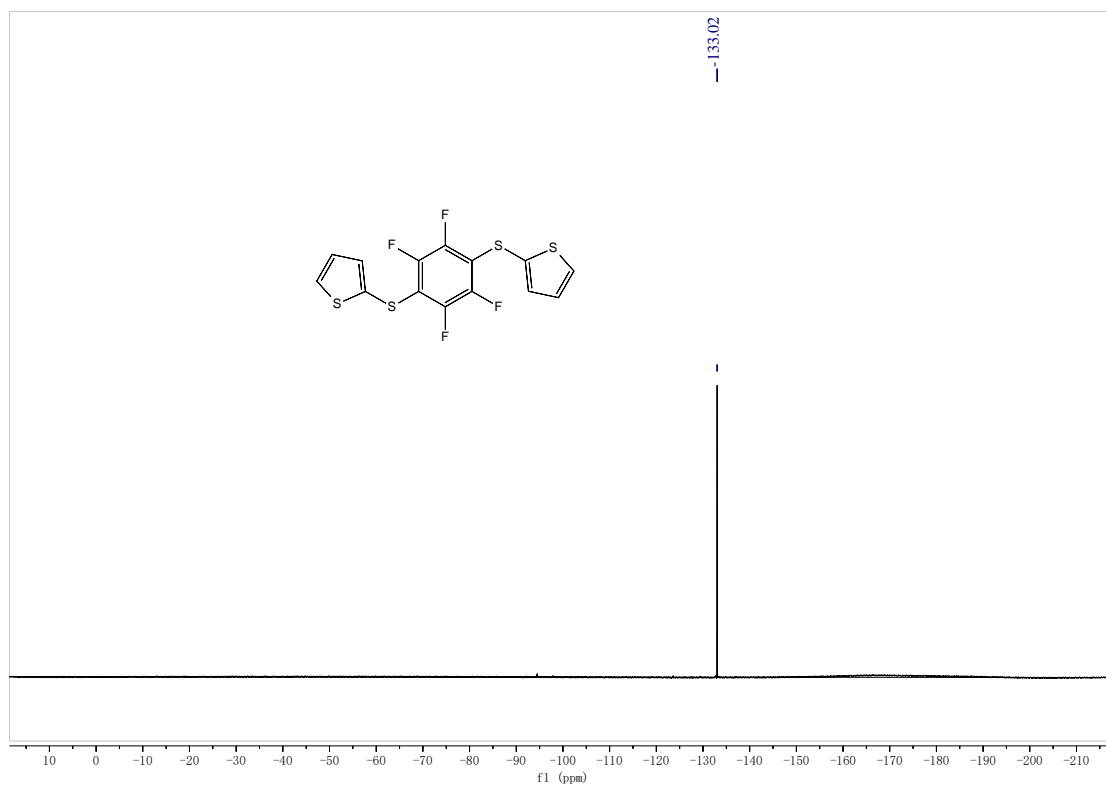

$^{19}\text{F}$  NMR (376 MHz,  $\text{CDCl}_3$ ): 2,3,5,6-tetrafluoro-1,4-bis(2-thienylsulfenyl)benzene (**3p**)

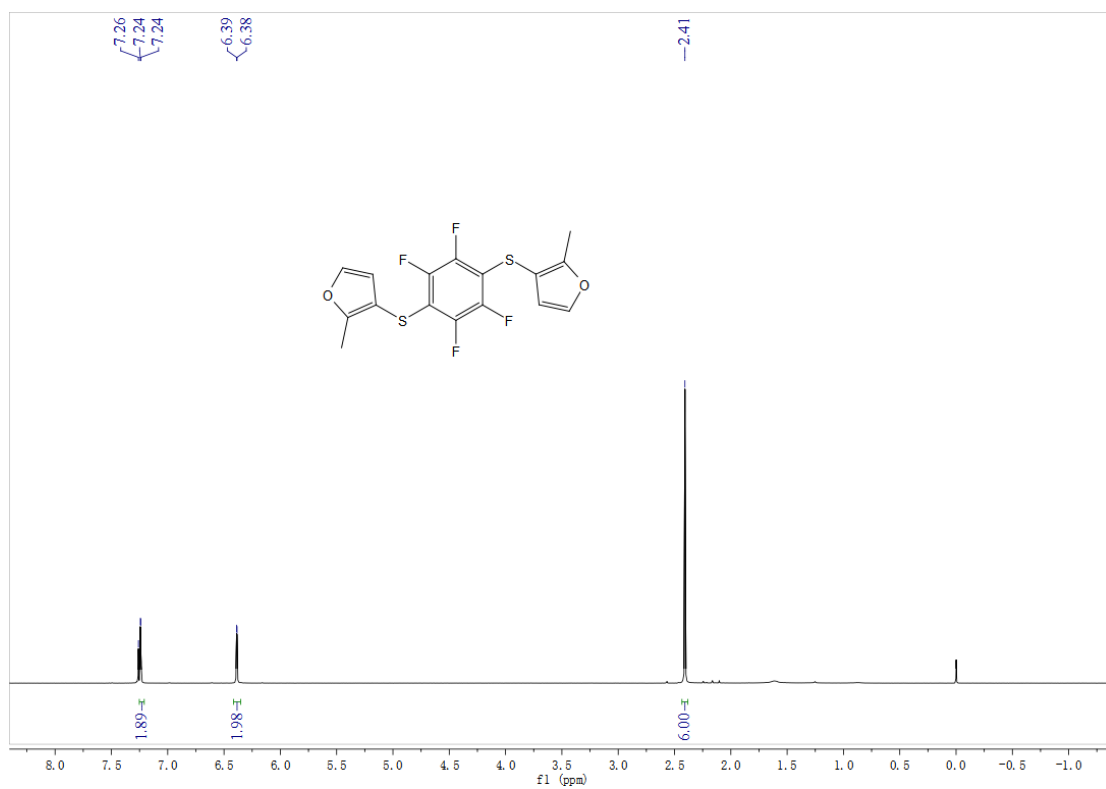

$^1\text{H}$  NMR (400 MHz,  $\text{CDCl}_3$ ): 2,3,5,6-tetrafluoro-1,4-bis(2-methyl-3-furyl)benzene (**3q**)

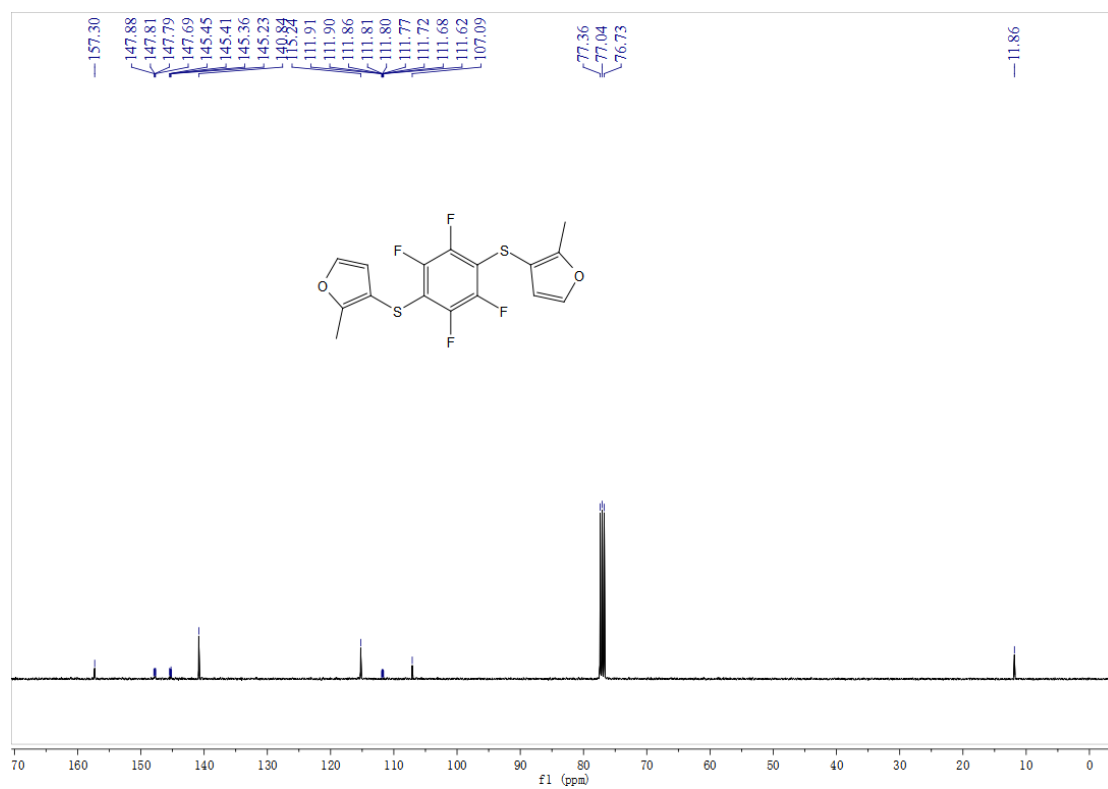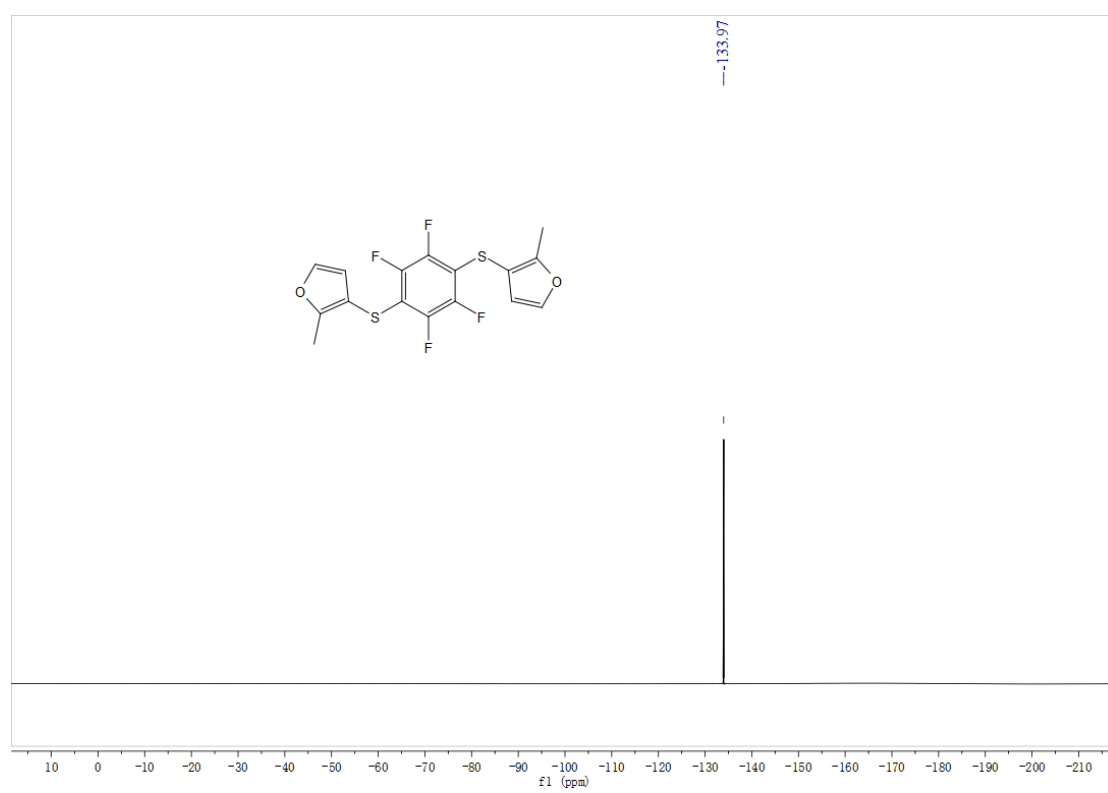



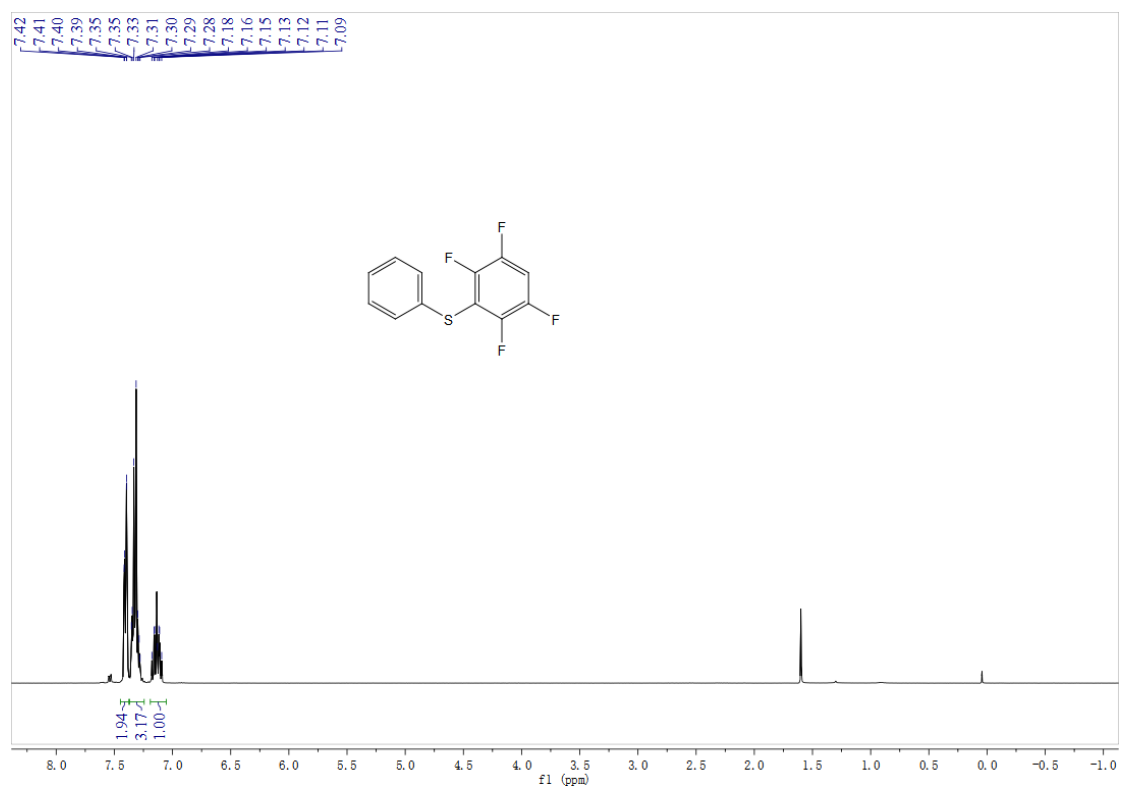

$^1\text{H}$  NMR (400 MHz,  $\text{CDCl}_3$ ): 1-phenylthio-2,3,5,6-tetrafluorobenzene (**7a**)

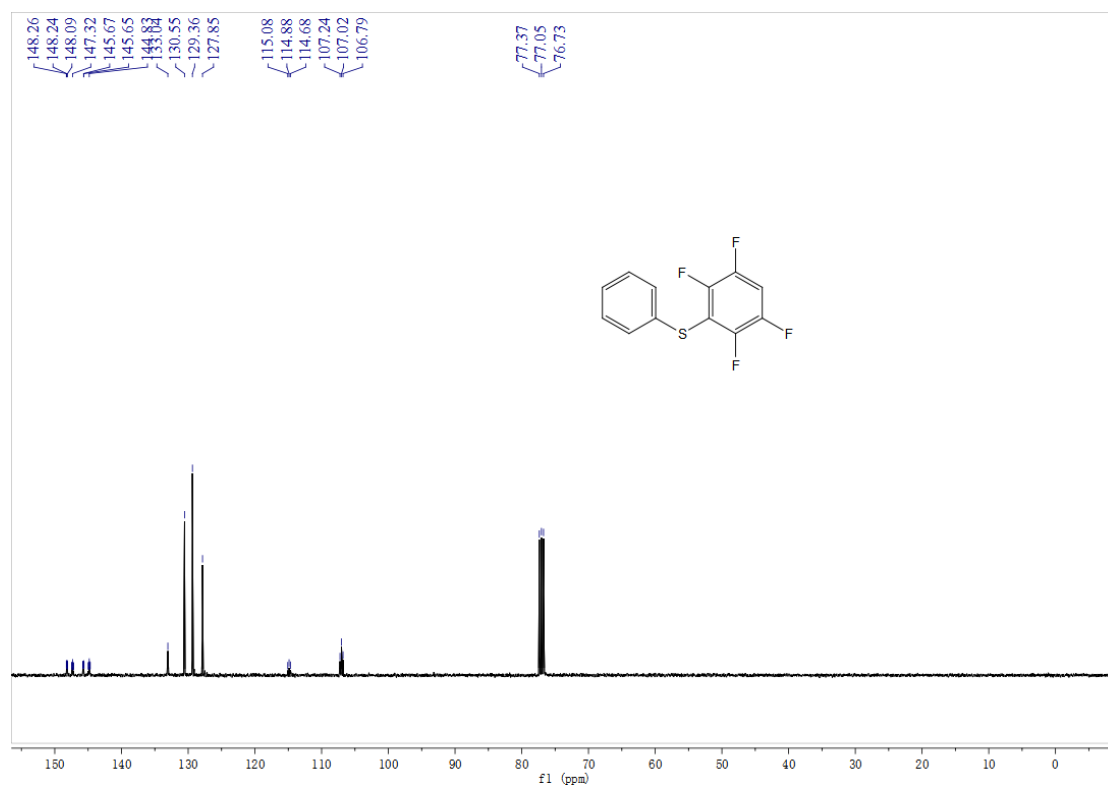

$^{13}\text{C}$  NMR (100 MHz,  $\text{CDCl}_3$ ): 1-phenylthio-2,3,5,6-tetrafluorobenzene (**7a**)

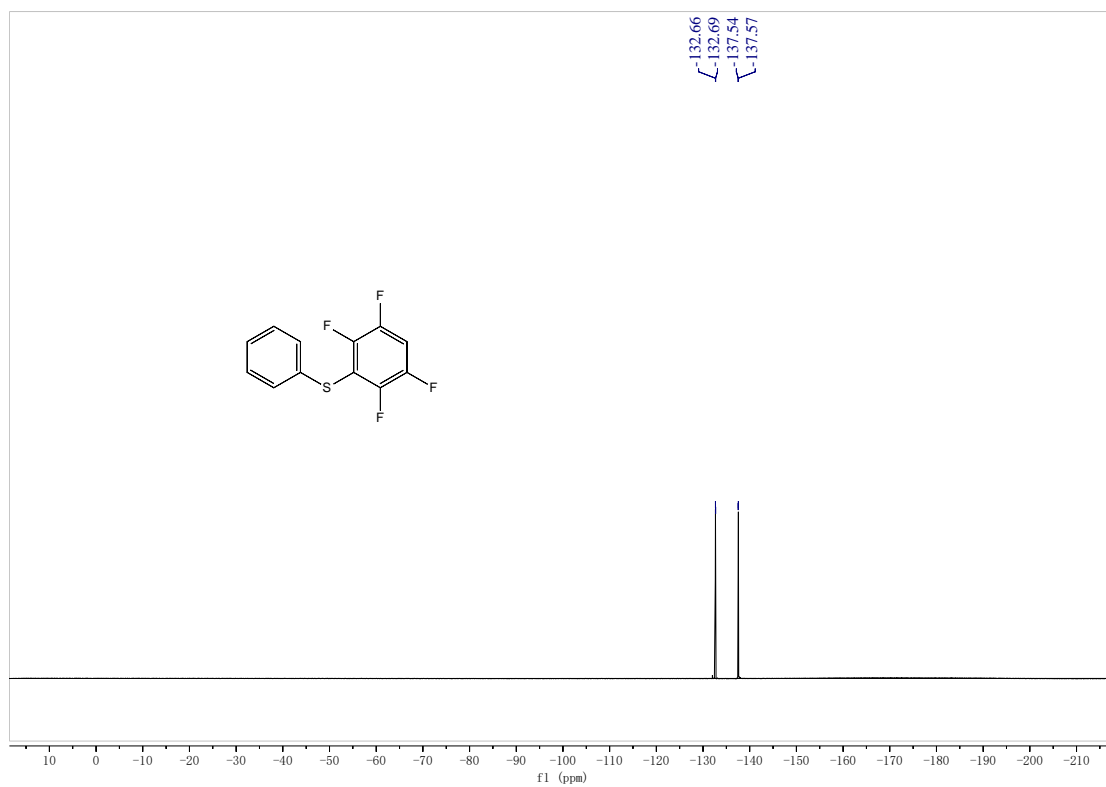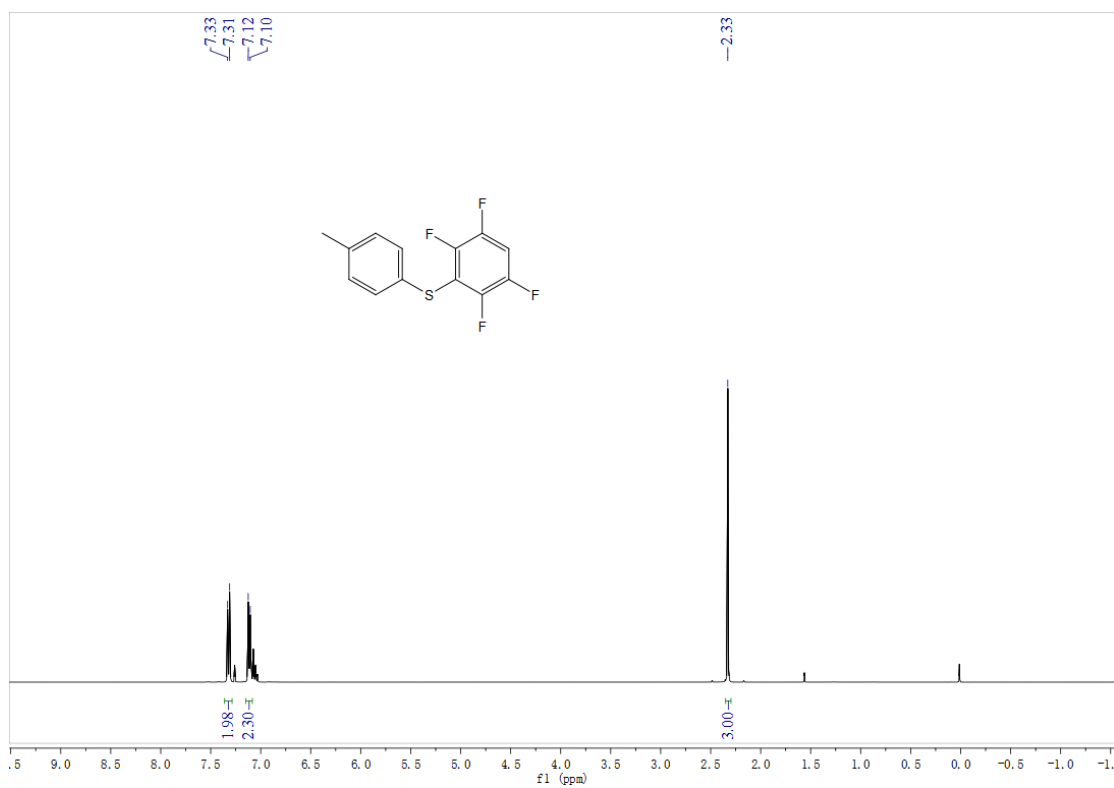

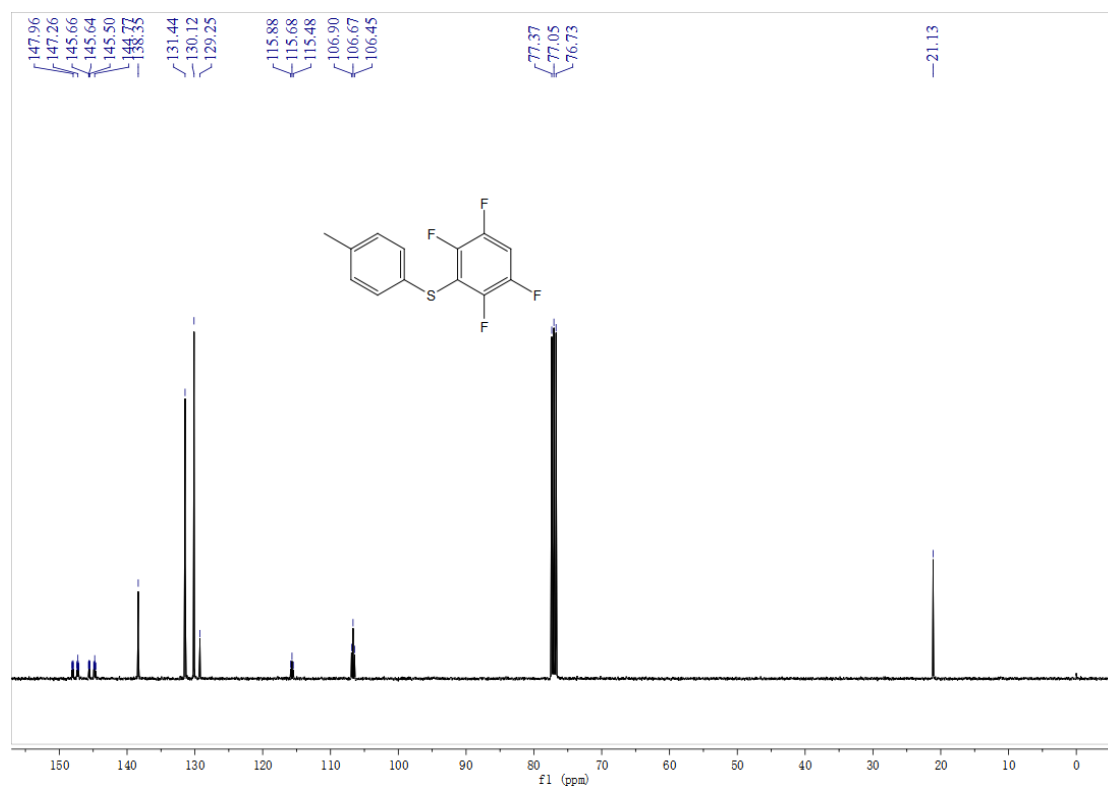

<sup>13</sup>C NMR (100 MHz, CDCl<sub>3</sub>): 2,3,5,6-tetrafluoro-1-(*p*-tolylthio)benzene (**7b**)

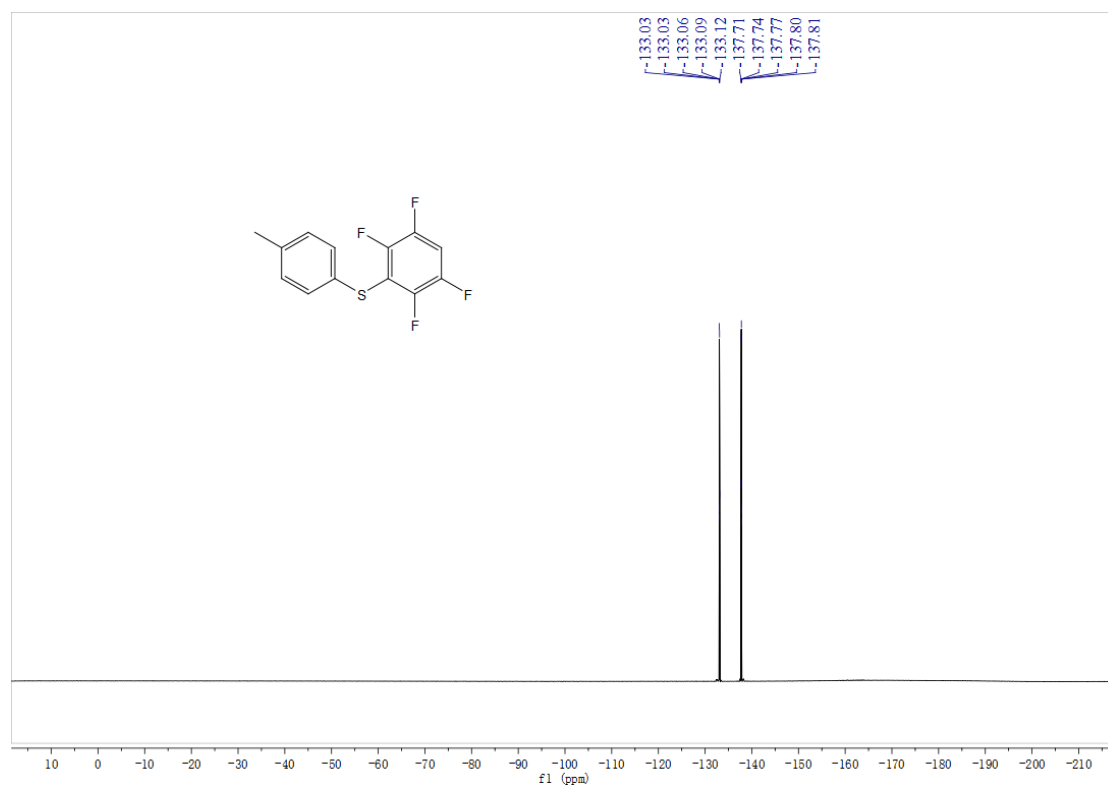

<sup>19</sup>F NMR (376 MHz, CDCl<sub>3</sub>): 2,3,5,6-tetrafluoro-1-(*p*-tolylthio)benzene (**7b**)

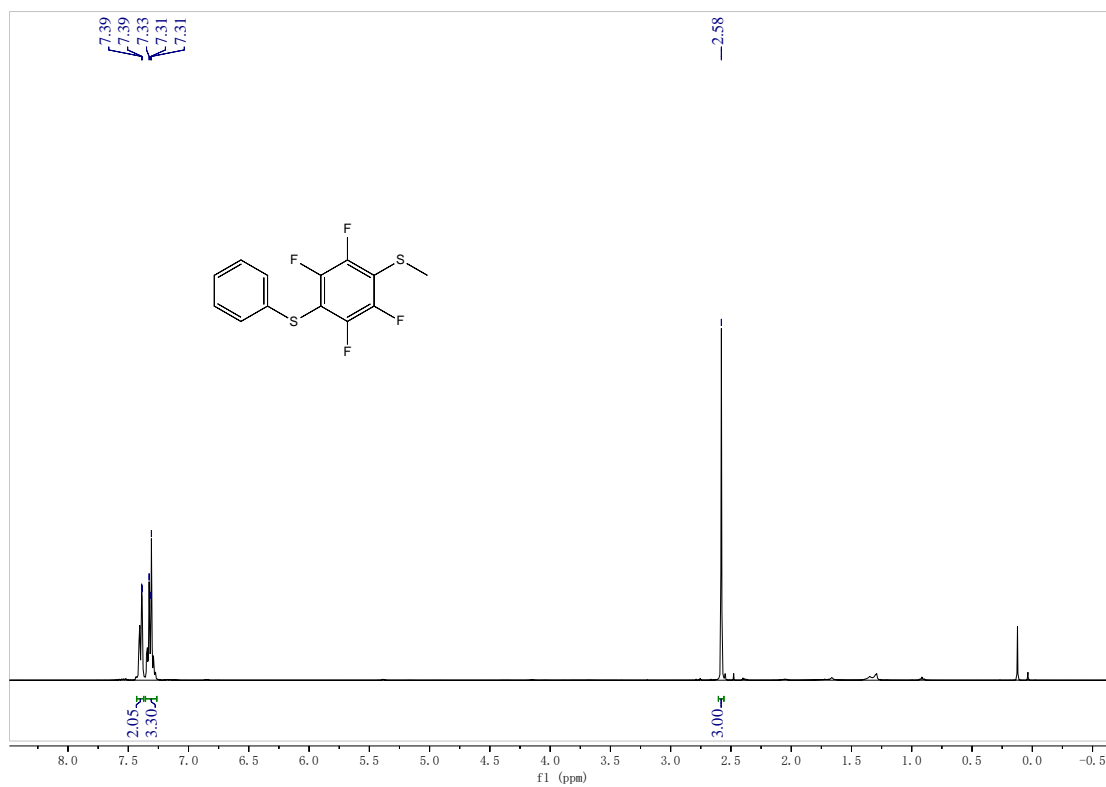

<sup>1</sup>H NMR (400 MHz, CDCl<sub>3</sub>): 1-methylmercapto-4-phenylmercapto-2,3,5,6-tetrafluor-benzol (**5b**)

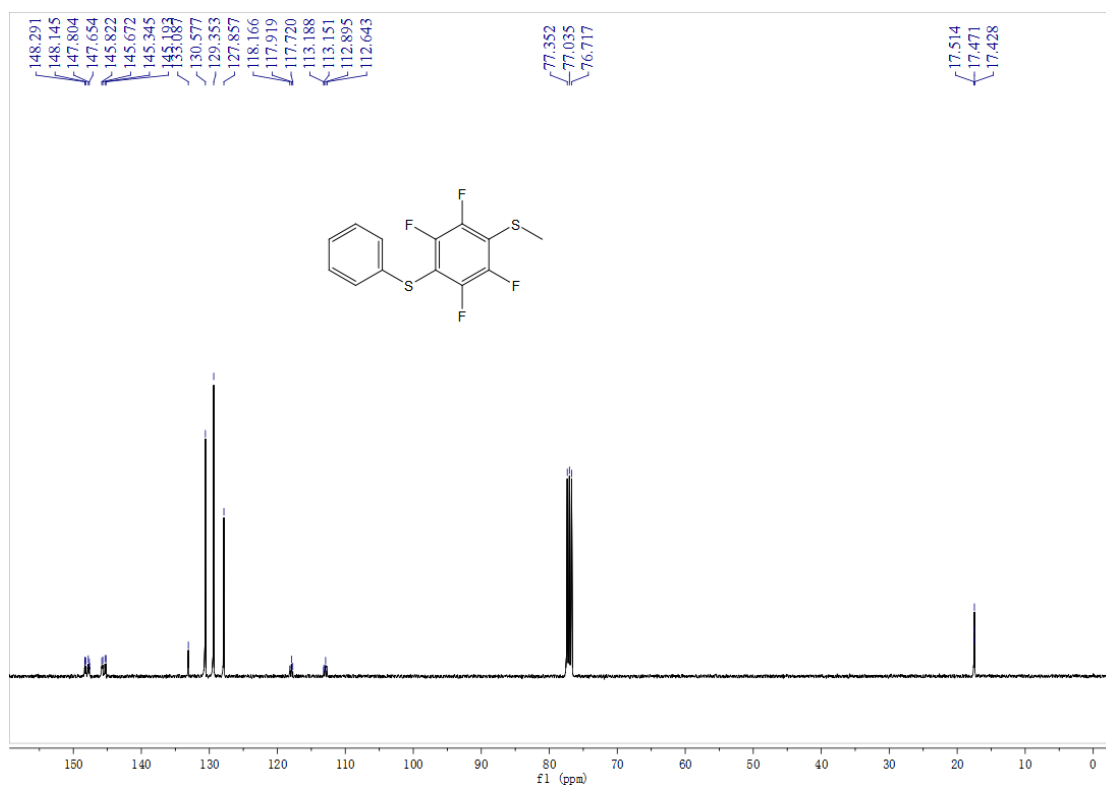

<sup>13</sup>C NMR (100 MHz, CDCl<sub>3</sub>): 1-methylmercapto-4-phenylmercapto-2,3,5,6-tetrafluor-benzol (**5b**)

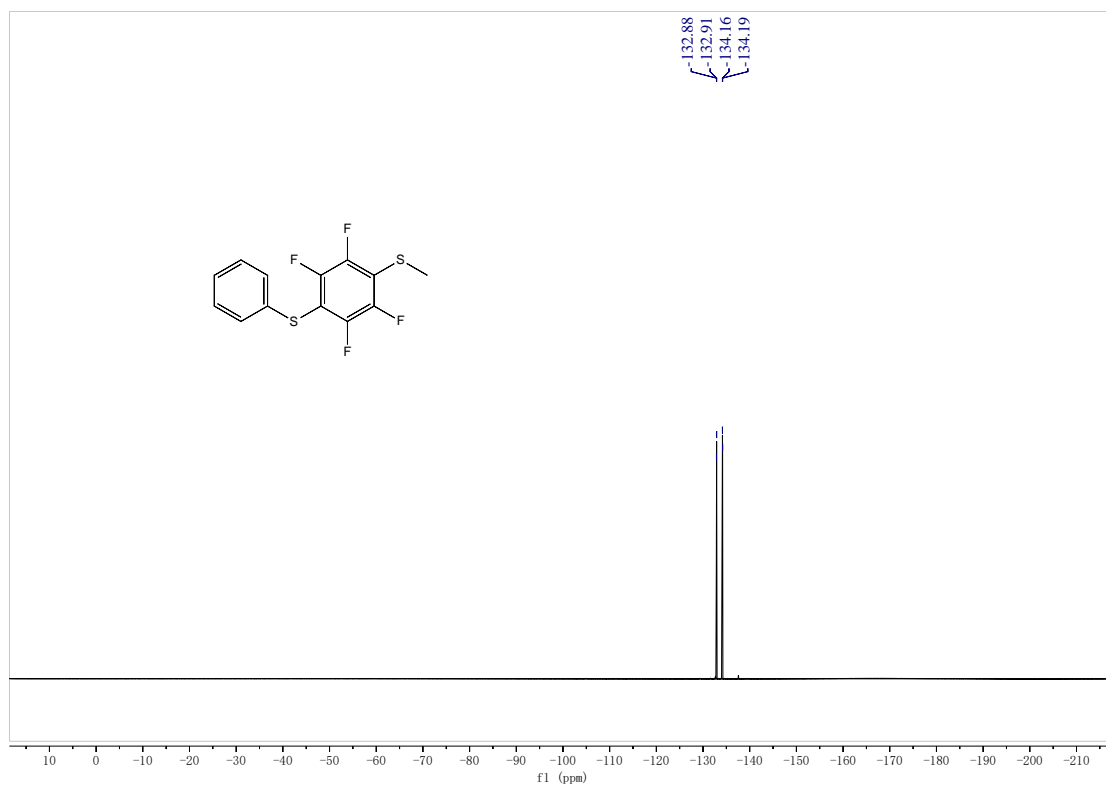

$^{19}\text{F}$  NMR (376 MHz,  $\text{CDCl}_3$ ): 1-methylmercapto-4-phenylmercapto-2,3,5,6-tetrafluor-benzol (**5b**)

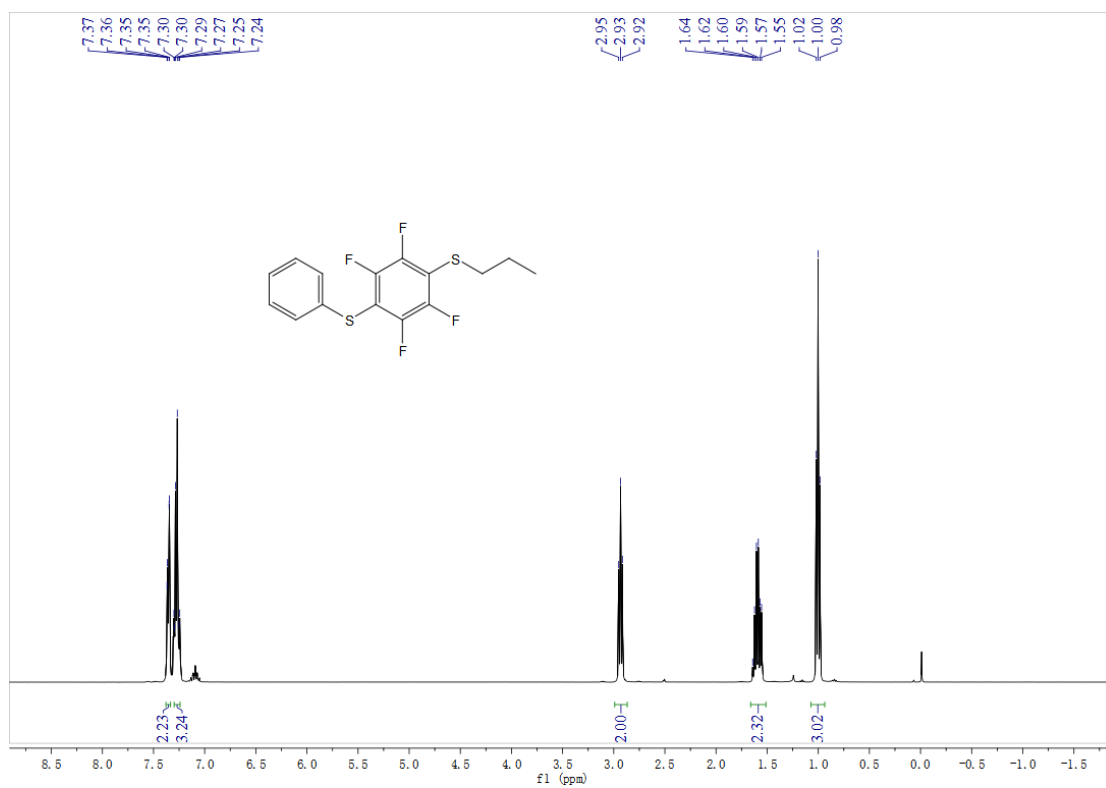

$^1\text{H}$  NMR (400 MHz,  $\text{CDCl}_3$ ): phenyl(2,3,5,6-tetrafluoro-4-(propylthio)phenyl)sulfane (**5c**)

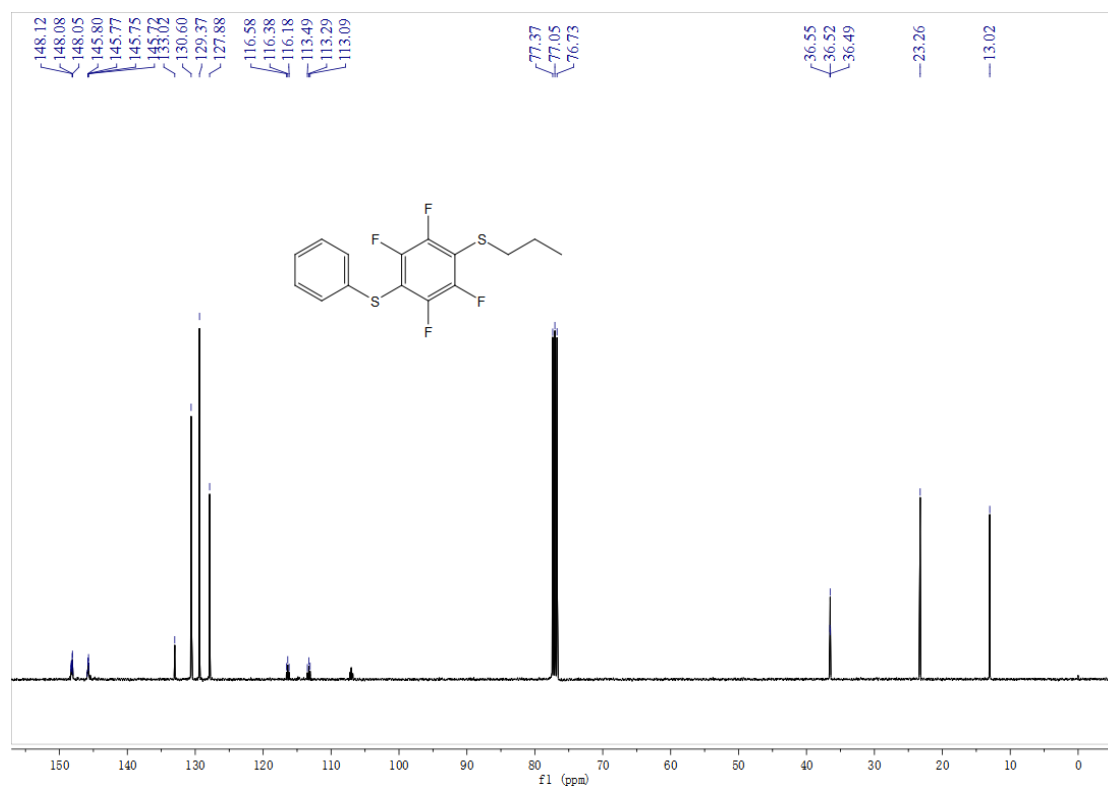

<sup>13</sup>C NMR (100 MHz, CDCl<sub>3</sub>): phenyl(2,3,5,6-tetrafluoro-4-(propylthio)phenyl)sulfane (**5c**)

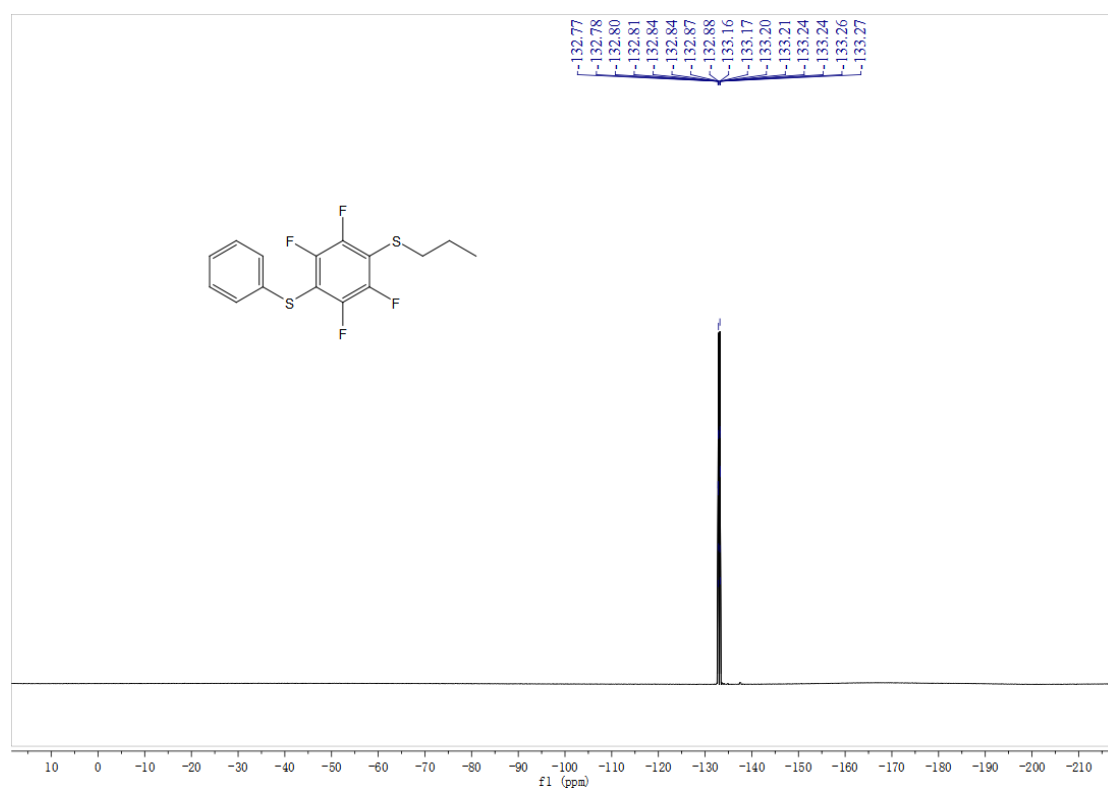

<sup>19</sup>F NMR (376 MHz, CDCl<sub>3</sub>): phenyl(2,3,5,6-tetrafluoro-4-(propylthio)phenyl)sulfane (**5c**)

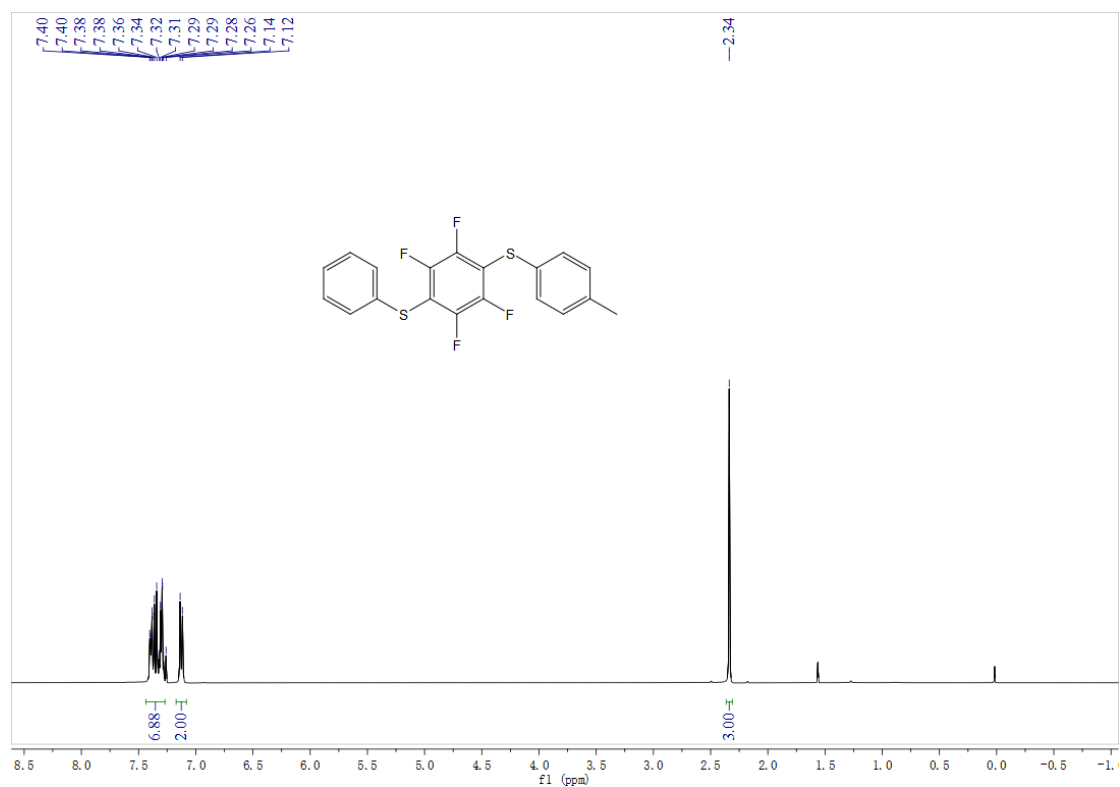

<sup>1</sup>H NMR (400 MHz, CDCl<sub>3</sub>): phenyl(2,3,5,6-tetrafluoro-4-(*p*-tolylthio)phenyl)sulfane (**5d**)

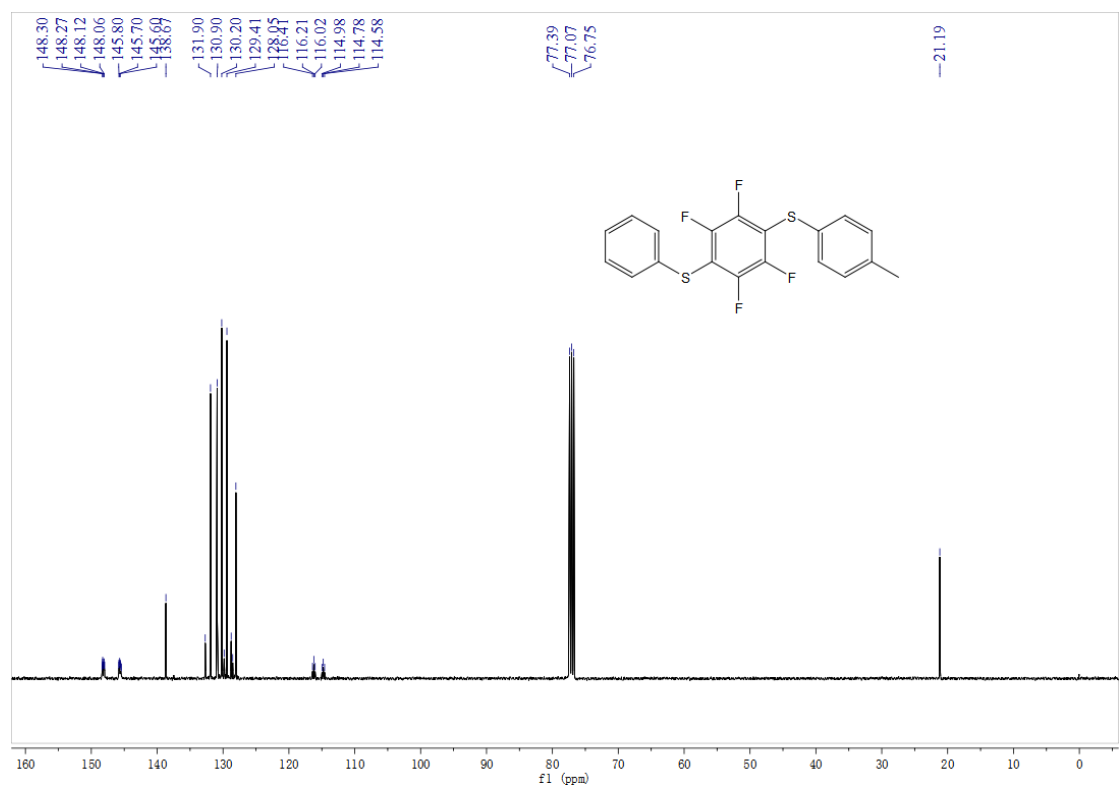

<sup>13</sup>C NMR (100 MHz, CDCl<sub>3</sub>): phenyl(2,3,5,6-tetrafluoro-4-(*p*-tolylthio)phenyl)sulfane (**5d**)

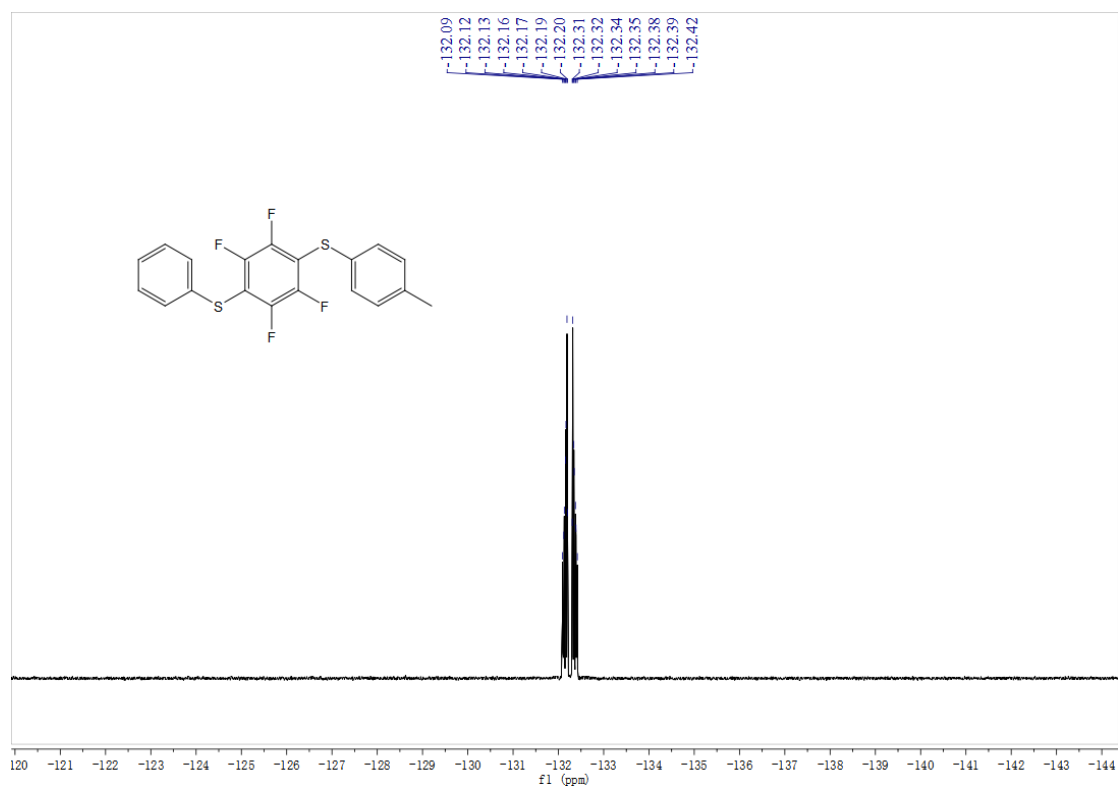

$^{19}\text{F}$  NMR (376 MHz,  $\text{CDCl}_3$ ): phenyl(2,3,5,6-tetrafluoro-4-(p-tolylthio)phenyl)sulfane (**5d**)

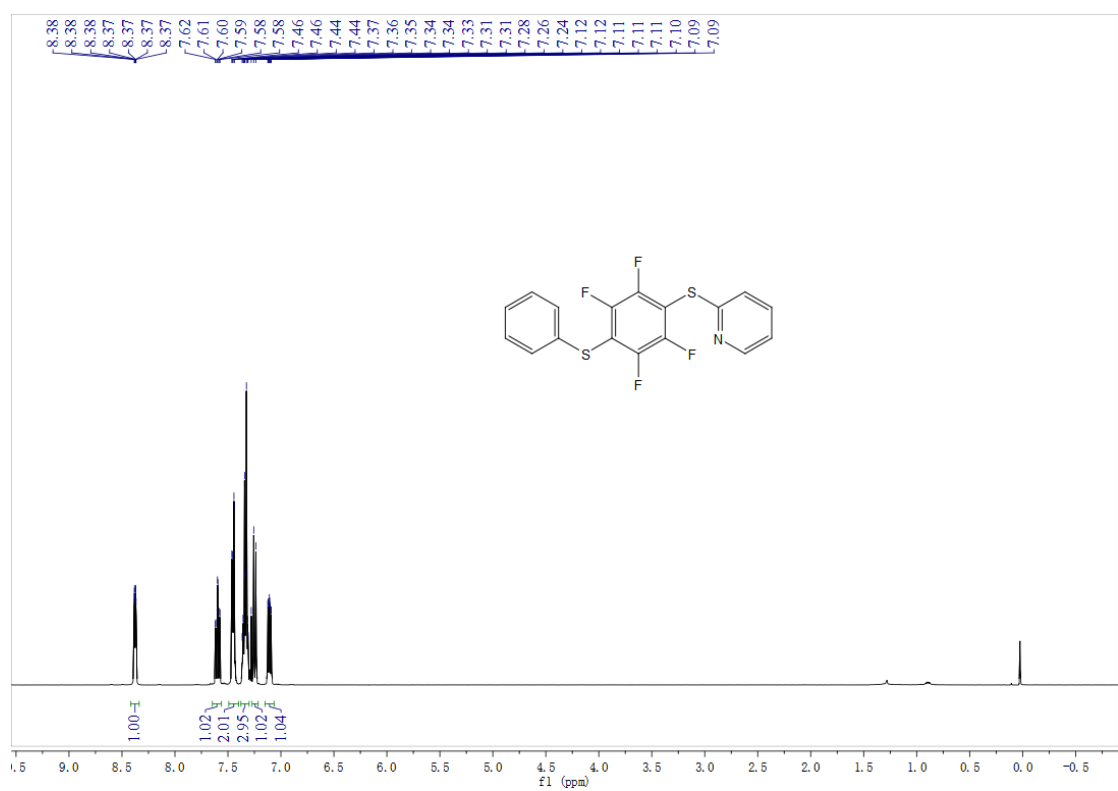

$^1\text{H}$  NMR (400 MHz,  $\text{CDCl}_3$ ): 2-((2,3,5,6-tetrafluoro-4-(phenylthio)phenyl)thio)pyridine (**5e**)



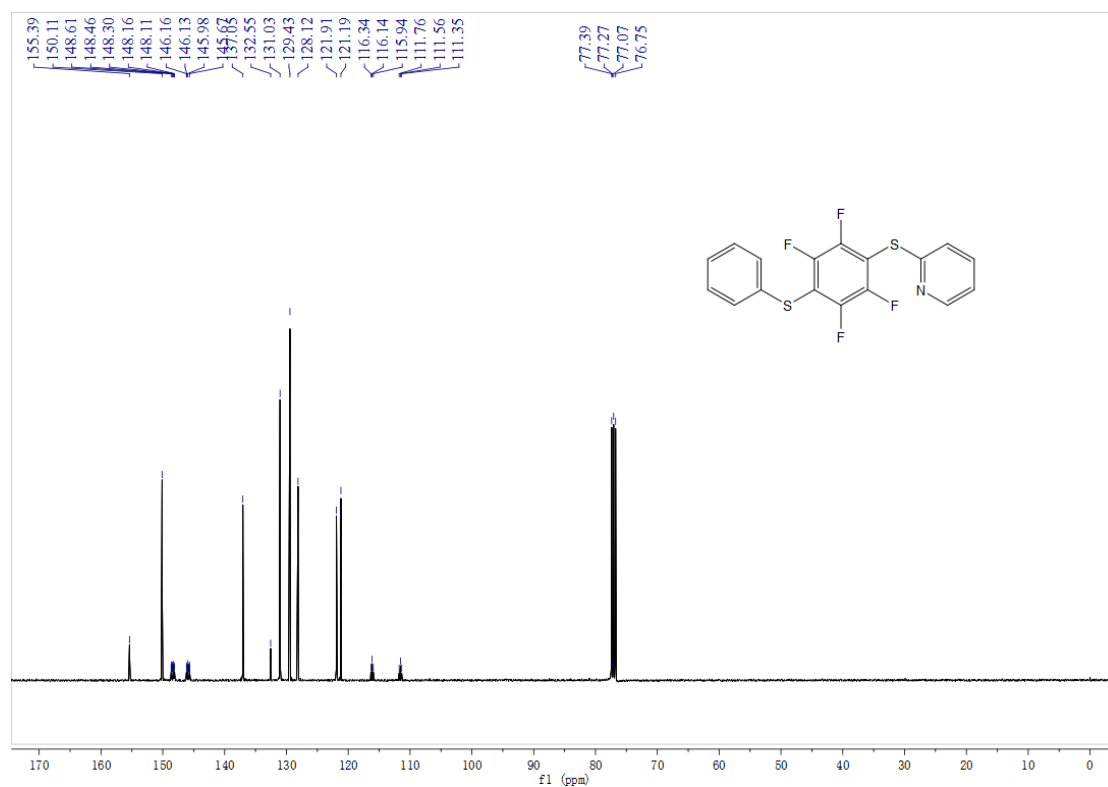

<sup>13</sup>C NMR (100 MHz, CDCl<sub>3</sub>): 2-((2,3,5,6-tetrafluoro-4-(phenylthio)phenyl)thio)pyridine(5e)

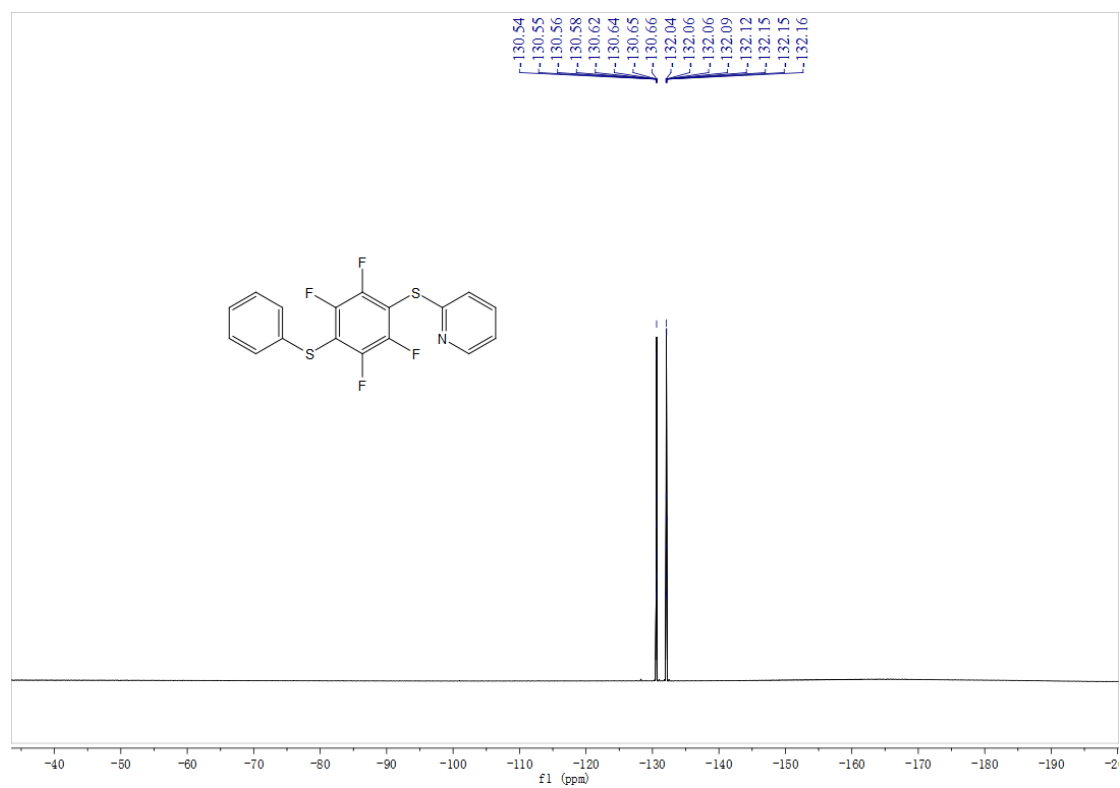

<sup>19</sup>F NMR (376 MHz, CDCl<sub>3</sub>): 2-((2,3,5,6-tetrafluoro-4-(phenylthio)phenyl)thio)pyridine(5e)

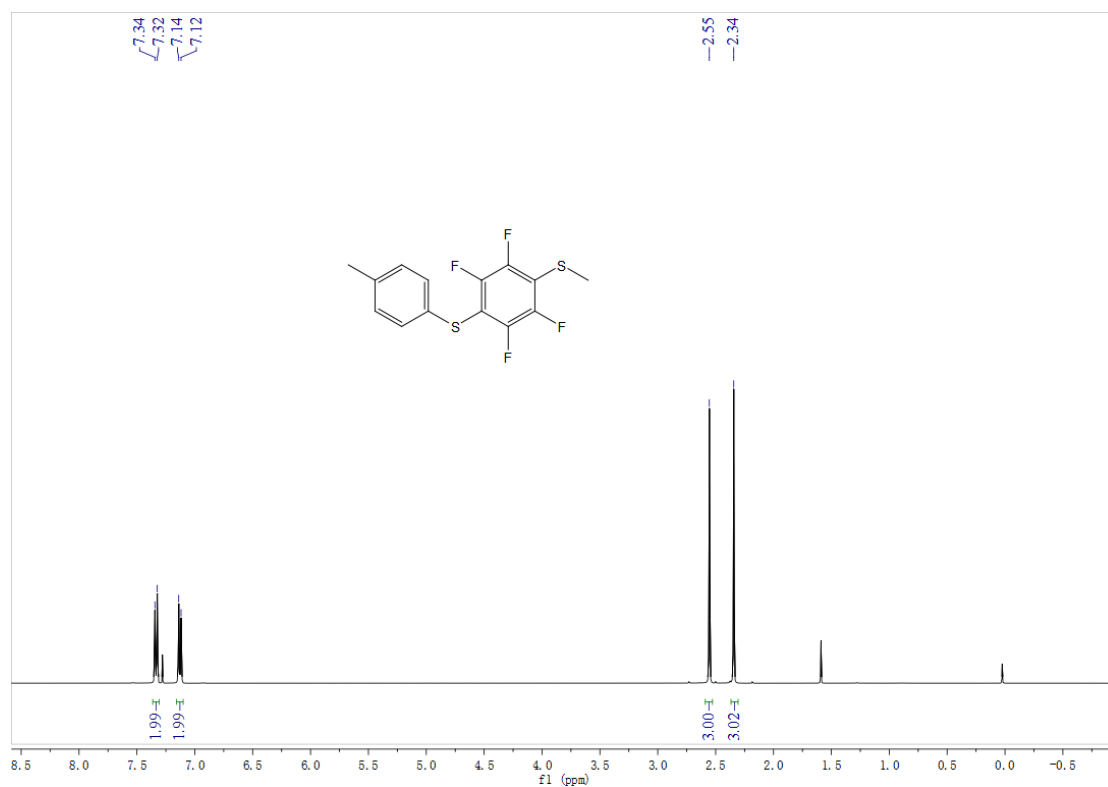

<sup>1</sup>H NMR (400 MHz, CDCl<sub>3</sub>): methyl(2,3,5,6-tetrafluoro-4-(p-tolylthio)phenyl)sulfane (**5f**)

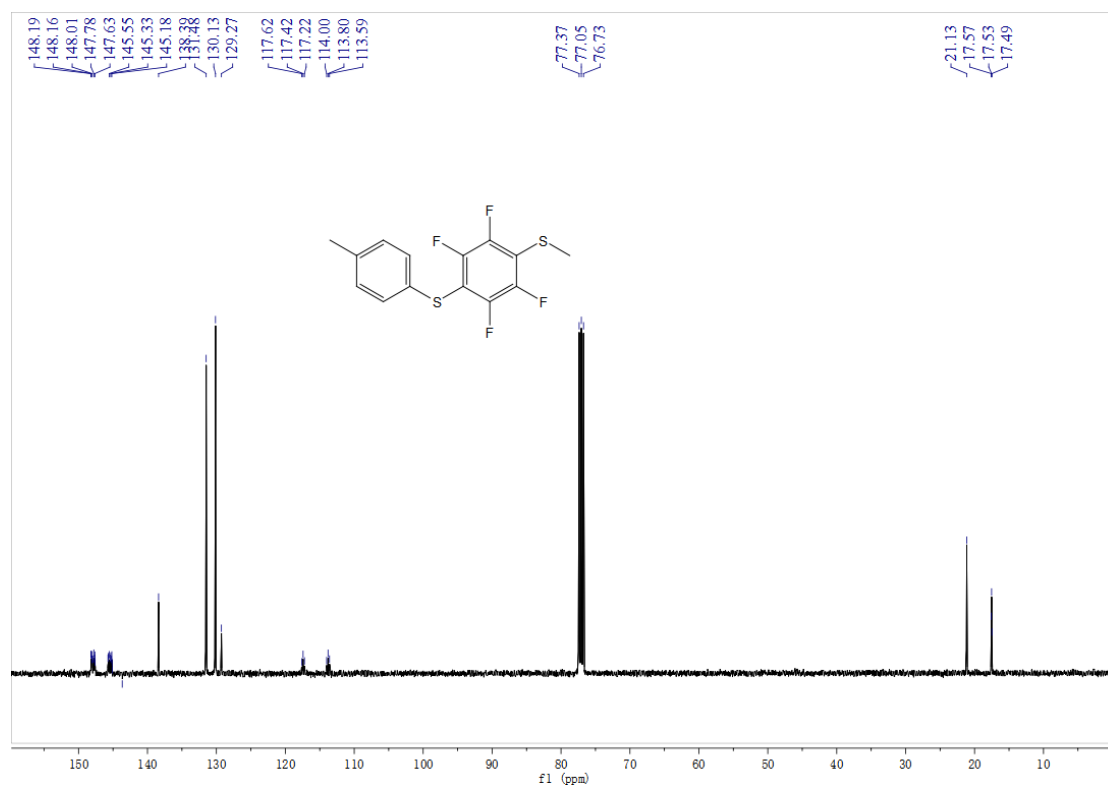

<sup>13</sup>C NMR (100 MHz, CDCl<sub>3</sub>): methyl(2,3,5,6-tetrafluoro-4-(p-tolylthio)phenyl)sulfane (**5f**)

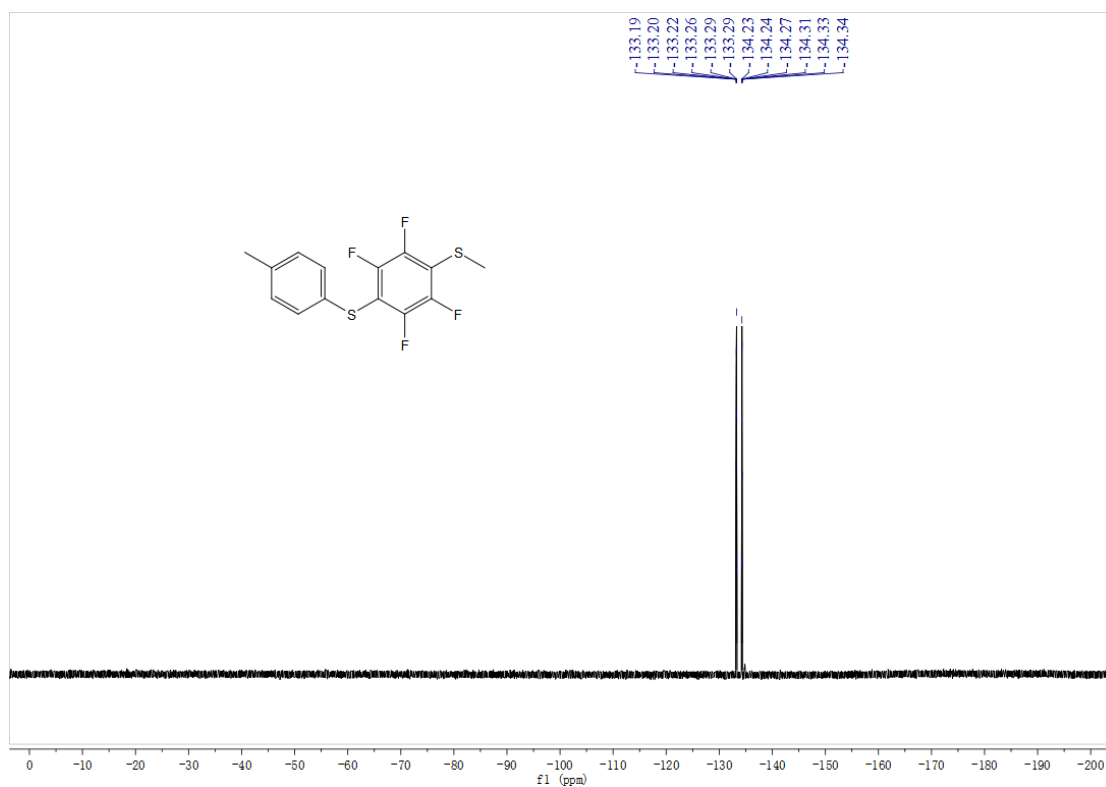

$^{19}\text{F}$  NMR (376 MHz,  $\text{CDCl}_3$ ): methyl(2,3,5,6-tetrafluoro-4-(p-tolylthio)phenyl)sulfane (5f)

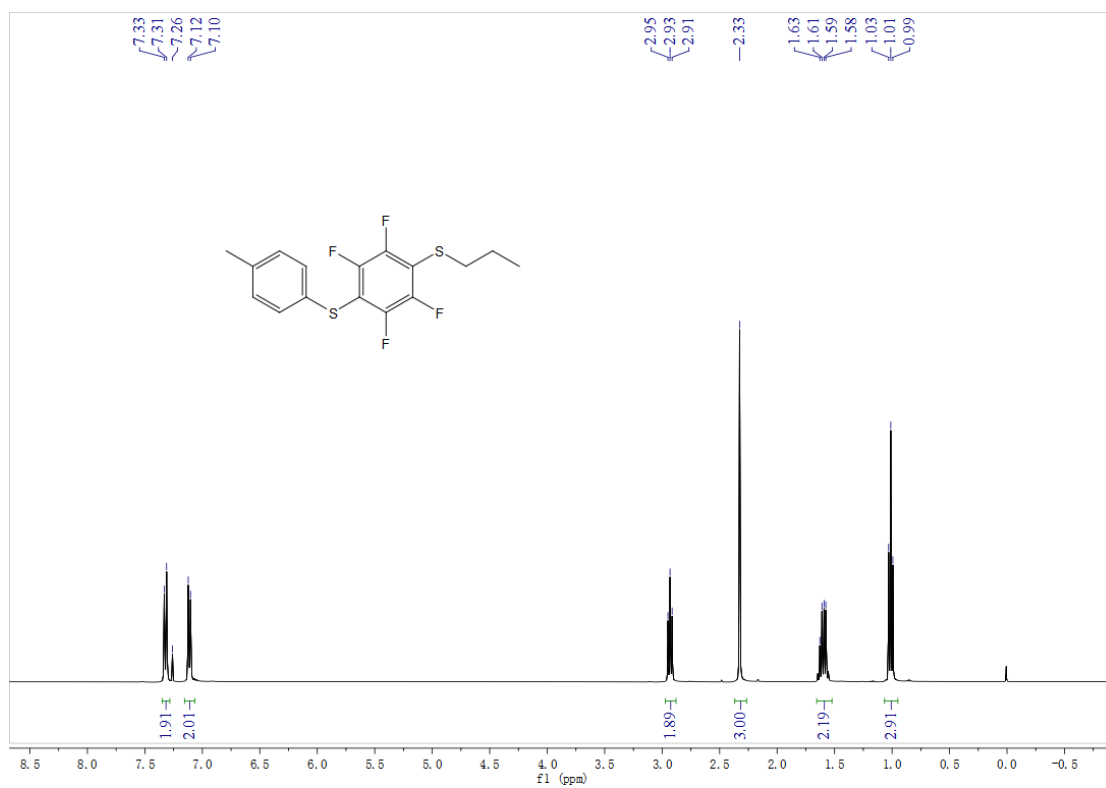

$^1\text{H}$  NMR (400 MHz,  $\text{CDCl}_3$ ): propyl(2,3,5,6-tetrafluoro-4-(p-tolylthio)phenyl)sulfane (5g)

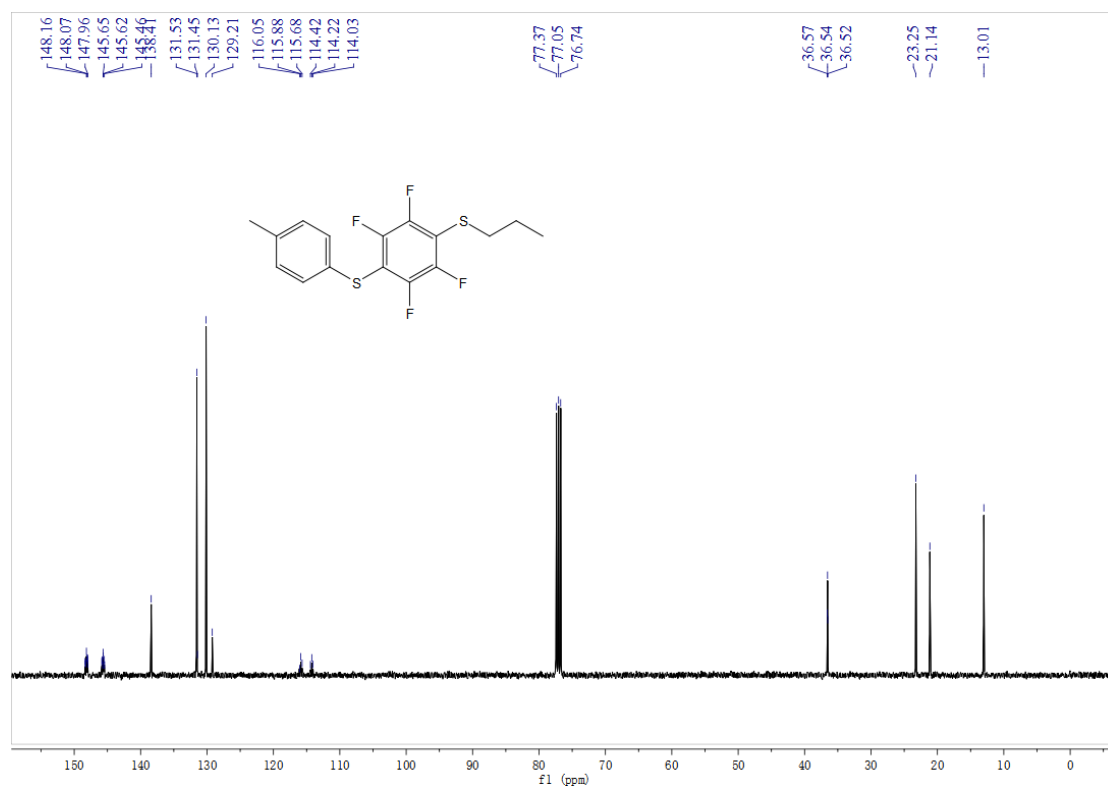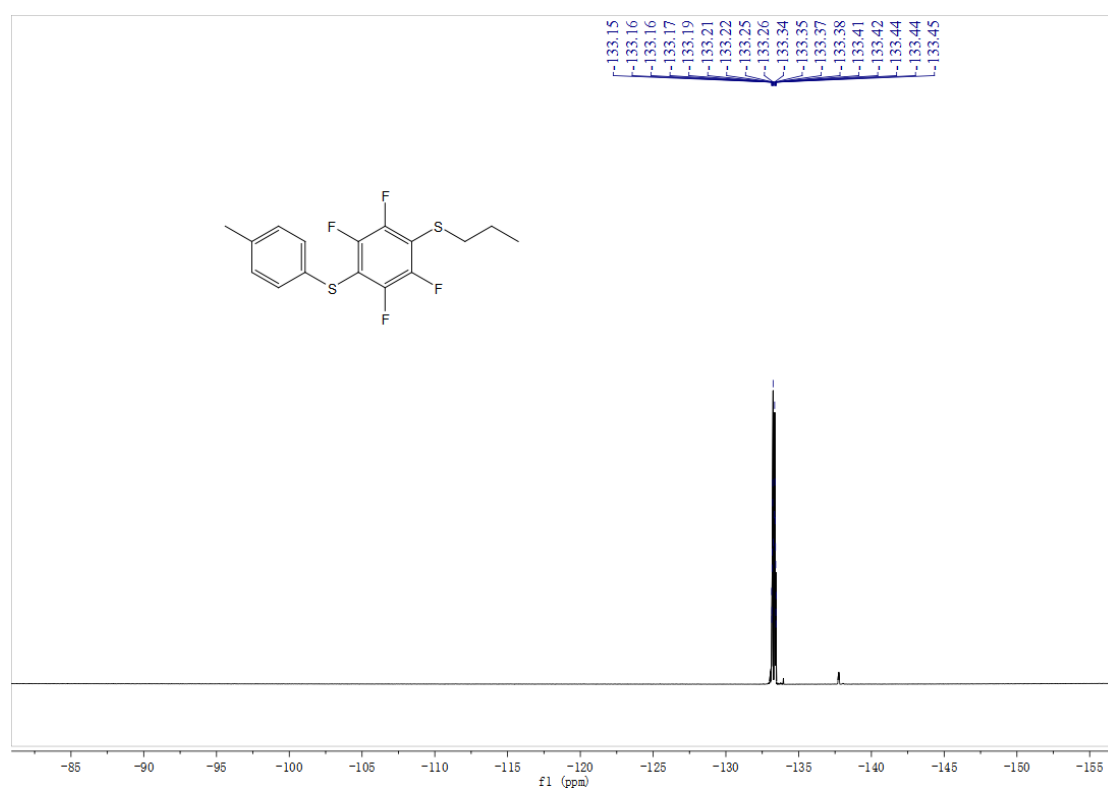

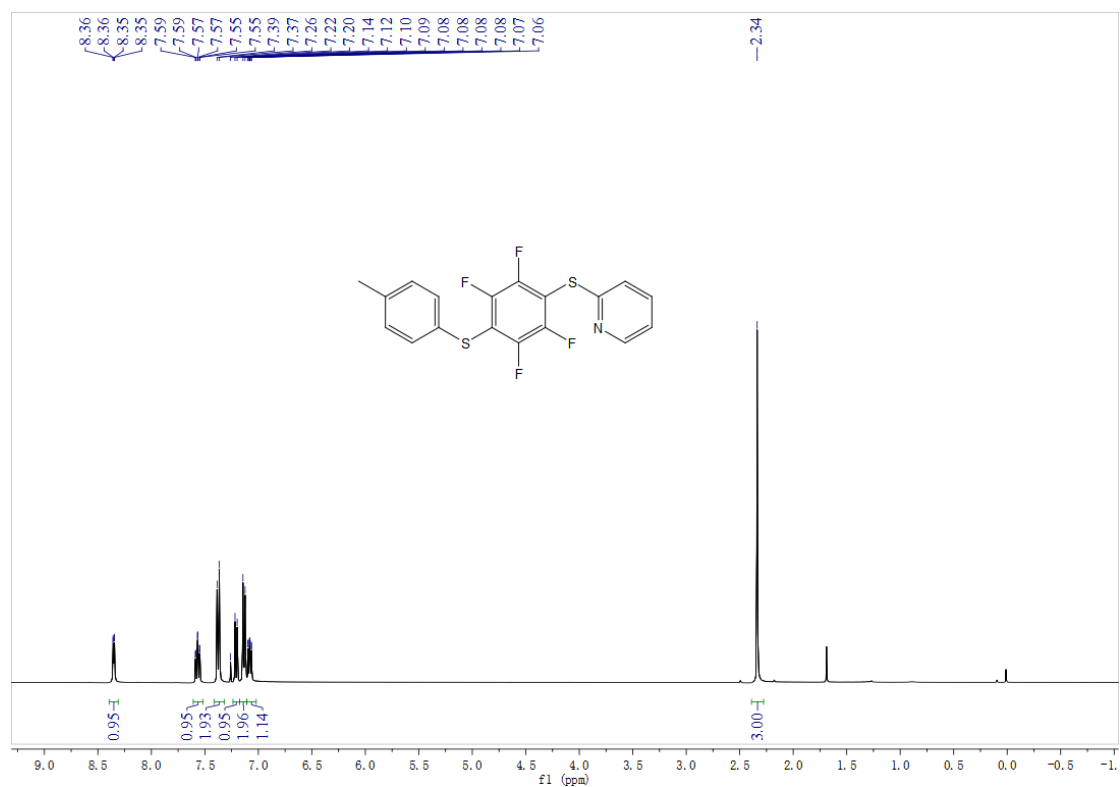

<sup>1</sup>H NMR (400 MHz, CDCl<sub>3</sub>): 2-((2,3,5,6-tetrafluoro-4-(p-tolylthio)phenyl)thio)pyridine (**5h**)

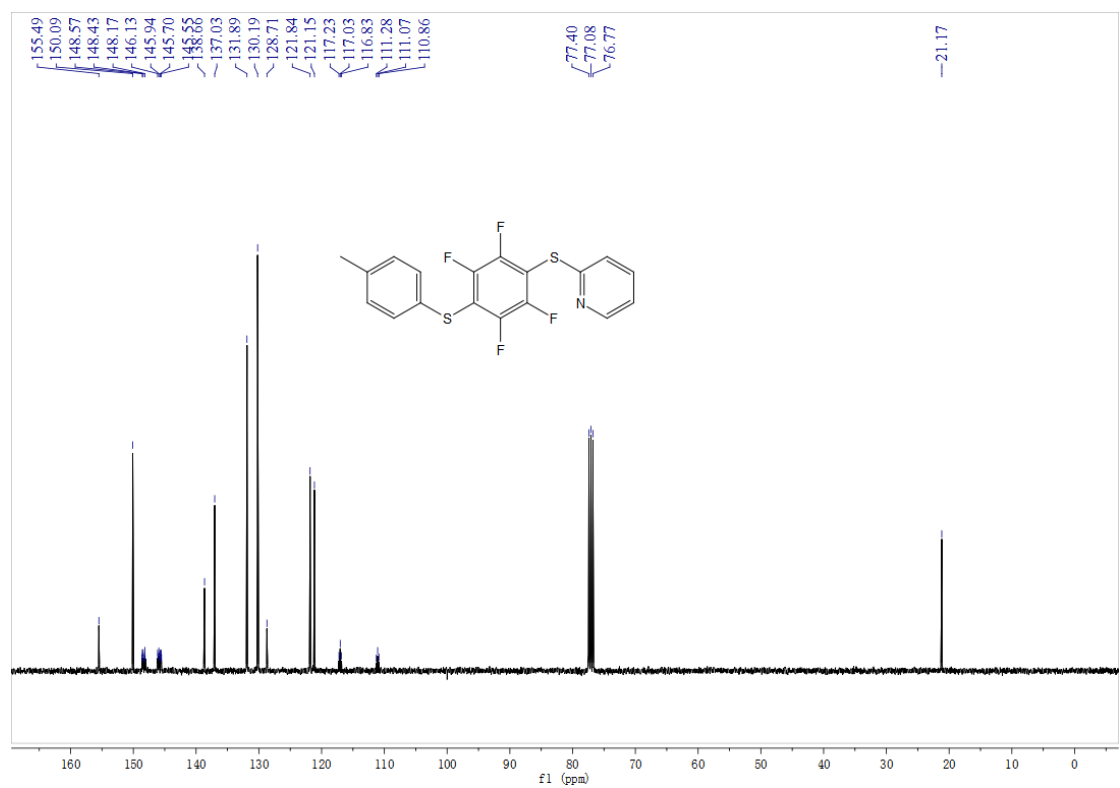

<sup>13</sup>C NMR (100 MHz, CDCl<sub>3</sub>): 2-((2,3,5,6-tetrafluoro-4-(p-tolylthio)phenyl)thio)pyridine (**5h**)

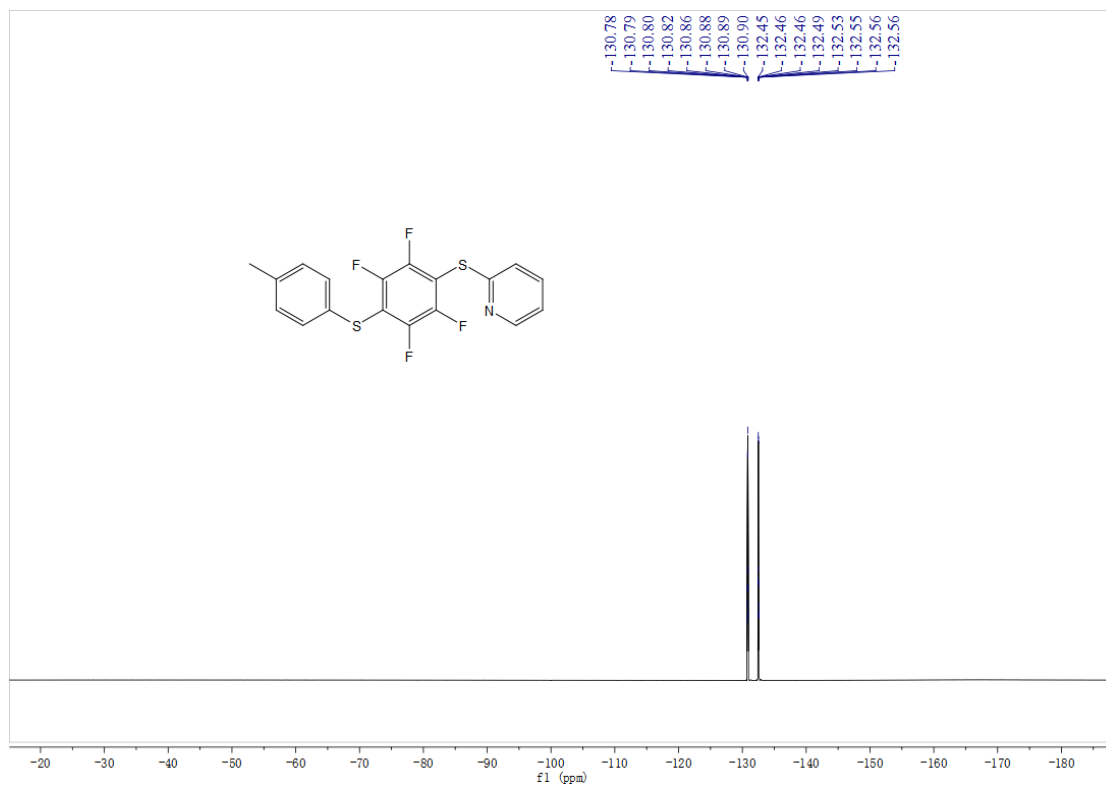

<sup>19</sup>F NMR (376 MHz, CDCl<sub>3</sub>): 2-((2,3,5,6-tetrafluoro-4-(p-tolylthio)phenyl)thio)pyridine (**5h**)

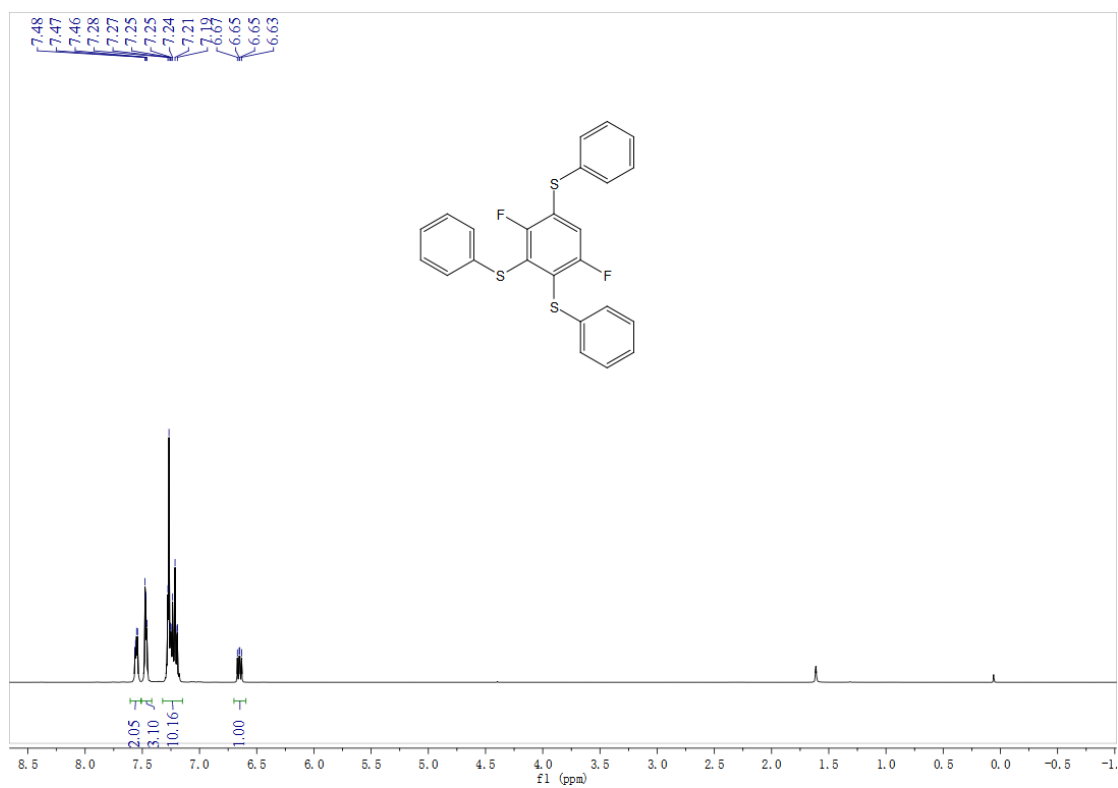

<sup>1</sup>H NMR (400 MHz, CDCl<sub>3</sub>): 1,2,4-tris(phenylthio)-3,6-difluorobenzene (**8**)

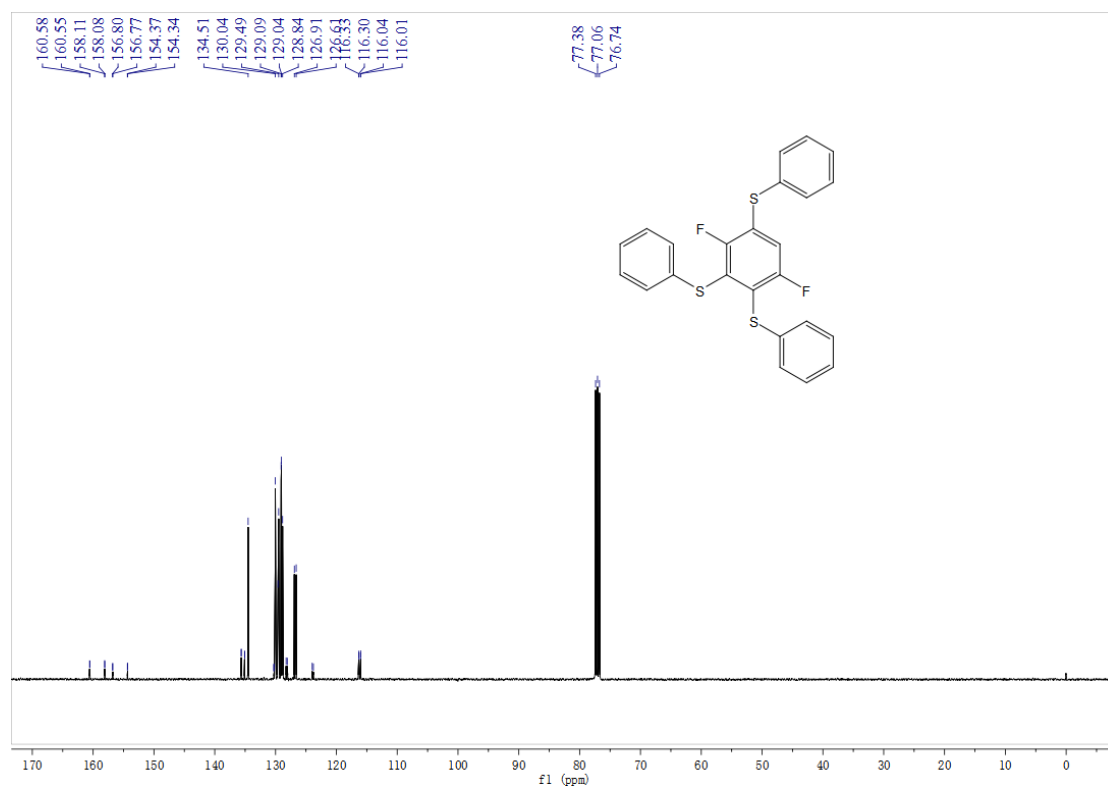

<sup>13</sup>C NMR (100 MHz, CDCl<sub>3</sub>): 1,2,4-tris(phenylthio)-3,6-difluorobenzene (**8**)

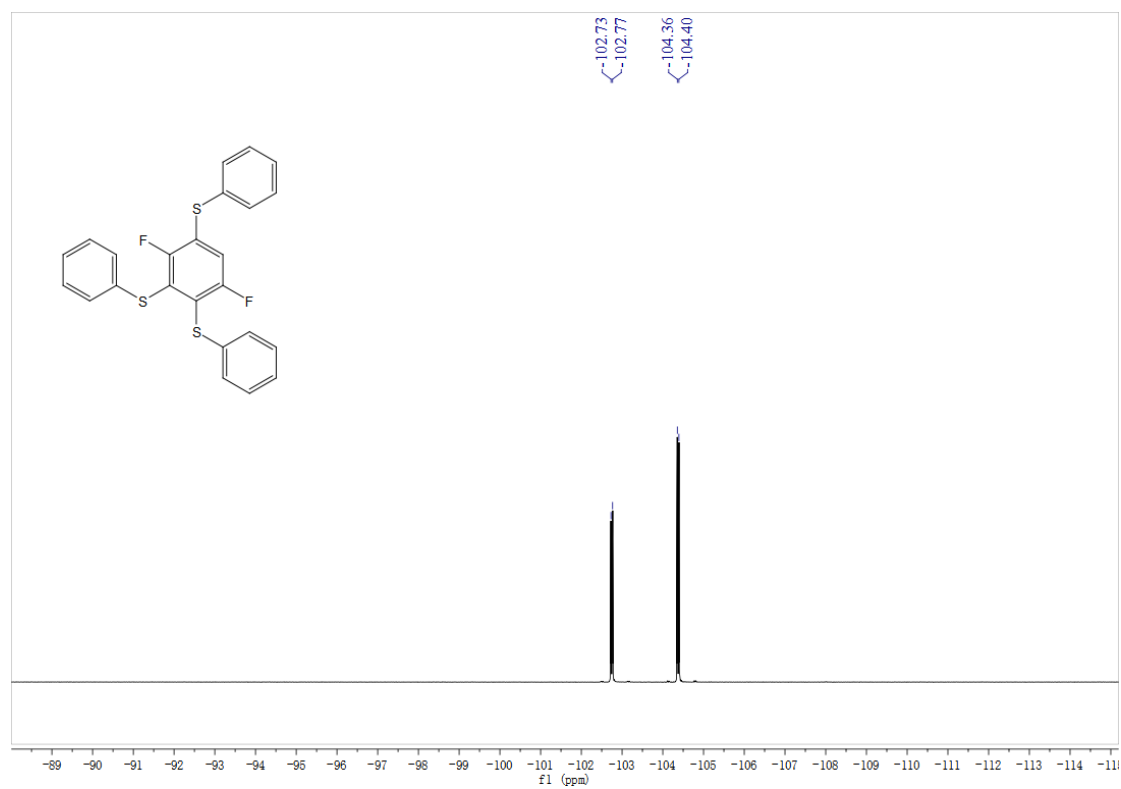

<sup>19</sup>F NMR (376 MHz, CDCl<sub>3</sub>): 1,2,4-tris(phenylthio)-3,6-difluorobenzene (**8**)

1. K. R. Langille and M. E. Peach, *J. Fluorine Chem.*, 1972, **1**, 407-414.
2. W. E. Ward, S. Sicree, B. Chen and C. Tamborski, *J. Fluorine Chem.*, 1995, **73**, 73-77.
3. S. Niembro, A. Vallribera and M. Moreno-Manas, *New J. Chem.*, 2008, **32**, 94-98.
4. C. Yu, C. Zhang and X. Shi, *Eur. J. Org. Chem.*, 2012, **2012**, 1953-1959.
5. M. Arisawa, T. Ichikawa and M. Yamaguchi, *Tetrahedron Lett.*, 2013, **54**, 4327-4329.
6. M. E. Peach and K. C. Smith, *J. Fluorine Chem.*, 1985, **27**, 105-114.
